# Supplementary material for: Chalcogen-doped, (seco)-hexabenzocoronene-based nanographenes: synthesis, properties, and chalcogen extrusion conversion
Source: Royal Society of Chemistry journal article supplement (doi:10.1039/d3sc02595k), 2023-01-01
Supplement: d3sc02595k1.pdf [file d3sc02595k1.pdf]

Supplementary Information for

**Chalcogen-Doped, (Seco)-Hexabenzocoronene-Based Nanographenes: Synthesis, Properties, and Chalcogen Extrusion Conversion**

*Ranran Li, Bin Ma, Shengtao Li, Chongdao Lu, and Peng An\**

School of Chemical Science and Technology & Key Laboratory of Medicinal Chemistry for Natural Resource,  
Ministry of Education, Yunnan University, Kunming 650500, P. R. China.

**Table of Contents**

|                                                                                                                                                                                                                                                      |     |
|------------------------------------------------------------------------------------------------------------------------------------------------------------------------------------------------------------------------------------------------------|-----|
| <b>General Information</b> .....                                                                                                                                                                                                                     | S2  |
| <b>Synthesis</b> .....                                                                                                                                                                                                                               | S2  |
| Scheme S1 Synthesis of nanographene <b>5<sub>O</sub></b> .....                                                                                                                                                                                       | S2  |
| Scheme S2 Synthesis of sulfur-doped nanographenes .....                                                                                                                                                                                              | S4  |
| Scheme S3 Synthesis of selenium-doped nanographenes .....                                                                                                                                                                                            | S8  |
| Scheme S4 Attempts to synthesize tellurium-doped nanographene .....                                                                                                                                                                                  | S12 |
| Scheme S5 Synthesis of nanographenes <b>29<sub>seco-HBC</sub></b> and <b>30<sub>HBC</sub></b> .....                                                                                                                                                  | S13 |
| Scheme S6 Attempts to synthesize fully cyclized nanographene <b>31<sub>S</sub></b> .....                                                                                                                                                             | S14 |
| Supplementary Figures and Tables                                                                                                                                                                                                                     |     |
| Figure S1 2D ROESY and 2D H-H COSY spectra of compound <b>16<sub>S</sub></b> .....                                                                                                                                                                   | S15 |
| Figure S2 2D ROESY and 2D H-H COSY spectra of compound <b>18<sub>se</sub></b> .....                                                                                                                                                                  | S16 |
| Figure S3 2D ROESY and 2D H-H COSY spectra of compound <b>24<sub>SO</sub></b> .....                                                                                                                                                                  | S17 |
| Table S1. Details of the crystal structure analyses of compounds <b>5<sub>O</sub></b> , <b>17<sub>S</sub></b> , and <b>18<sub>se</sub></b> .....                                                                                                     | S18 |
| Table S2. Details of the crystal structure analyses of compounds <b>21</b> , <b>23</b> , <b>24<sub>SO</sub></b> , and <b>30<sub>HBC</sub></b> .....                                                                                                  | S19 |
| Figure S4. X-ray crystallography of compound <b>5<sub>O</sub></b> .....                                                                                                                                                                              | S20 |
| Figure S5. X-ray crystallography of compound <b>17<sub>S</sub></b> .....                                                                                                                                                                             | S20 |
| Figure S6. X-ray crystallography of compounds <b>18<sub>se</sub></b> .....                                                                                                                                                                           | S21 |
| Figure S7. X-ray crystallography of compound <b>24<sub>SO</sub></b> .....                                                                                                                                                                            | S21 |
| Table S3. Photophysical properties summary .....                                                                                                                                                                                                     | S22 |
| Figure S8. UV-vis spectroscopy of all nanographenes.....                                                                                                                                                                                             | S22 |
| Figure S9. Fluorescence spectroscopy of compounds <b>16<sub>S</sub></b> , <b>18<sub>se</sub></b> , <b>24<sub>SO</sub></b> , <b>26<sub>SeO</sub></b> , <b>29<sub>seco-HBC</sub></b> , and <b>30<sub>HBC</sub></b> .....                               | S23 |
| Figure S10. Fluorescence emission of different nanographenes in different solvents .....                                                                                                                                                             | S24 |
| Figure S11 Cyclic Voltammetry of <b>5<sub>O</sub></b> , <b>17<sub>S</sub></b> , <b>19<sub>se</sub></b> , <b>25<sub>SO</sub></b> , <b>27<sub>SeO</sub></b> , <b>28<sub>SO2</sub></b> , <b>29<sub>seco-HBC</sub></b> and <b>30<sub>HBC</sub></b> ..... | S25 |
| Figure S12 Optical resolution of compound <b>17<sub>S</sub></b> .....                                                                                                                                                                                | S27 |
| Figure S13 Optical resolution of compound <b>19<sub>se</sub></b> .....                                                                                                                                                                               | S28 |
| Figure S14 Preparation of optically pure enantiomers <b>25<sub>SO-P</sub></b> and <b>25<sub>SO-M</sub></b> .....                                                                                                                                     | S29 |
| Figure S15. CPL dissymmetry factor spectra of <b>17<sub>S-P/17<sub>S-M</sub></sub></b> and <b>25<sub>SO-P/25<sub>SO-M</sub></sub></b> .....                                                                                                          | S30 |
| Figure S16 Thermal enantiomerization study of <b>17<sub>S-P</sub></b> .....                                                                                                                                                                          | S31 |
| Figure S17 Thermal enantiomerization study of <b>19<sub>se-P</sub></b> .....                                                                                                                                                                         | S34 |
| Figure S18. UV-vis spectroscopy changes of <b>5<sub>O</sub></b> upon heating .....                                                                                                                                                                   | S37 |
| Figure S19. HPLC-based thermal study of <b>25<sub>SO</sub></b> .....                                                                                                                                                                                 | S38 |
| Figure S20. HPLC-based thermal study of <b>19<sub>se</sub></b> .....                                                                                                                                                                                 | S39 |
| Figure S21. HPLC-based thermal study of <b>27<sub>SeO</sub></b> .....                                                                                                                                                                                | S40 |
| Figure S22. HPLC-based stability study of <b>27<sub>SeO</sub></b> in acid .....                                                                                                                                                                      | S41 |
| Figure S23. UV-vis absorption changes of <b>5<sub>O</sub></b> (a), <b>17<sub>S</sub></b> (b), <b>19<sub>se</sub></b> (c), <b>25<sub>SO</sub></b> (d) in acid.....                                                                                    | S42 |
| Figure S24. UV-vis absorption changes of <b>27<sub>SeO</sub></b> in methanesulfonic acid .....                                                                                                                                                       | S43 |
| Figure S25. Solubility comparison of compounds <b>27<sub>SeO</sub></b> and <b>30<sub>HBC</sub></b> in DCM and EtOH.....                                                                                                                              | S44 |
| <b>Computational Details</b> .....                                                                                                                                                                                                                   | S45 |
| Figure S26. Calculated ECD spectra of <b>17<sub>S-P/17<sub>S-M</sub></sub></b> , and <b>19<sub>se-P/19<sub>se-M</sub></sub></b> .....                                                                                                                | S45 |
| Figure S27. Isosurface of LOL- $\pi$ and calculated NICS (0) plot of the backbones .....                                                                                                                                                             | S46 |
| Figure S28. Molecular orbitals (HOMO-1–LUMO+1) with major transitions. ....                                                                                                                                                                          | S46 |
| Table S4–S9. Atomic coordinates for the DFT calculated structures.....                                                                                                                                                                               | S47 |
| Table S10–S15. Major transitions of backbones calculated by TD-DFT .....                                                                                                                                                                             | S62 |
| <b>References</b> .....                                                                                                                                                                                                                              | S69 |
| <b>Spectra</b> (Figure S29–Figure S50) .....                                                                                                                                                                                                         | S70 |

## General Information

Solvents and chemicals were purchased from commercial sources and used directly without further purification. Molecular sieves were activated in an oven and solvents for reaction was stored with molecular sieves. Petroleum ether (PE) used had a boiling range of 60–90 °C. Reactions were monitored by TLC on silica gel GF 254 plates. Column chromatography was generally performed through silica gel (200–300 mesh). All reactions were run open to air unless specifically described. NMR spectra were recorded with Bruker-400, 500 or 600 MHz spectrometers. Unless specified otherwise, the NMR spectra were recorded at 22 °C; they were calibrated using the residual solvent signal ( $^1\text{H}$ ) or solvent signal ( $^{13}\text{C}$ ). Chemical shifts were reported in parts per million (ppm). Chemical shifts were reported in ppm using TMS or deuterated solvents as internal standards (for  $^1\text{H}$  NMR:  $\text{CDCl}_3$ , 7.26; for  $^{13}\text{C}$  NMR:  $\text{CDCl}_3$ , 77.0). Multiplicity was reported as follows: s = singlet, d = doublet, t = triplet, q = quartet, m = multiplet, brs = broad. Coupling constants (J) are reported in Hertz (Hz). UV-Vis absorption spectra were recorded using a 1-cm quartz cuvette on a Shimadzu-UV-2600 spectrometer. Fluorescence spectra were recorded using a 1-cm quartz cuvette or powder form on a Gangdong F-320 spectrofluorometer at 25 °C. High-resolution mass spectrometry was performed on a Thermo LTQ-Orbitrap XL mass spectrometer equipped with collision cells for collision-induced dissociation or Bruker MALDI-TOF MS RapifleX. Fluorescent decay was recorded in the HORIBA FL-3 instrument. Crystallographic data were collected on a Bruker D8 Venture diffractometer.

## Syntheses

### Scheme S1. Synthesis of nanographene **5<sub>0</sub>**.

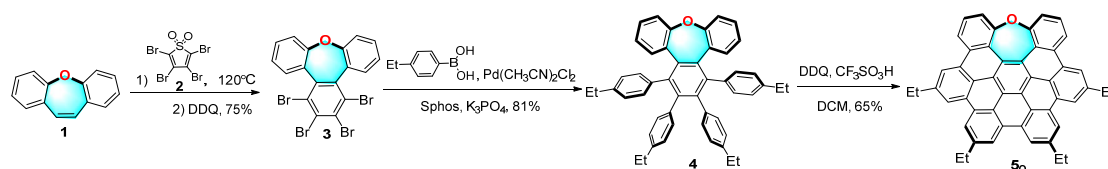

**1,2,3,4-Tetrabromotribenzo[b,d,f]oxepine (3)**: A mixture of dibenzo[b,f]oxepine **1** (194 mg, 1.0 mmol, 1.0 equiv), tetrabromothiophene-S,S-dioxide **2**<sup>[S1]</sup> (647 mg, 1.5 mmol, 1.5 equiv) in toluene (5 mL) in the sealed tube was heated to 110–120 °C until no dibenzo[b,f]oxepine **1** left (around 12 hours, checked by TLC: silica, PE: DCM = 4:1, UV). Then the solvent was removed under reduced pressure, after the residue was dissolved in dichloromethane (15 mL), 2,3-dichloro-5,6-dicyano-1,4-benzoquinone (340 mg, 1.5 mmol, 1.5 equiv) was added and the mixture was stirred at room temperature for around 30 minutes. The reaction mixture was concentrated under reduced pressure and purified by silica gel flash chromatography (10–20% DCM in PE) to give the compound **3** (420 mg, 75% for two steps) as a faint yellow solid: mp:

189–190 °C;  $^1\text{H}$  NMR (400 MHz,  $\text{CDCl}_3$ )  $\delta$  7.69 (dd,  $J = 8.0, 2.0$  Hz, 2H), 7.33 (td,  $J = 8.0$  Hz, 2.0 Hz, 2H), 7.26 (dd,  $J = 8.0, 2.0$  Hz, 2H), 7.15 (td,  $J = 8.0, 2.0$  Hz, 2H);  $^{13}\text{C}$  NMR (101 MHz,

CDCl<sub>3</sub>)  $\delta$  161.9, 138.3, 133.4, 130.8, 130.6, 130.4, 126.5, 123.8, 120.2; HRMS (MALDI-TOF)  $m/z$ : [M+H]<sup>+</sup> Calcd for C<sub>18</sub>H<sub>8</sub>Br<sub>4</sub>O 555.7304; Found 555.7318.

**1,2,3,4-Tetrakis(4-ethyl phenyl)tribenzo[b,d,f]oxepine (4)**: To a solution of oxepine **3** (334mg, 0.6 mmol, 1.0 equiv) in toluene (10 mL) was quickly added (4-ethyl phenyl) boronic acid (720 mg, 4.8 mmol, 8.0 equiv), palladium (II) chloride diacetonitrile complex (23 mg, 0.09 mmol, 0.15 equiv), 2-dicyclohexylphosphino-2,6-dimethoxy-1,1-biphenyl (SPhos, 74 mg, 0.18 mmol, 0.3 equiv) and potassium phosphate tribasic (2.04 g, 9.6 mmol, 16.0equiv) under argon atmosphere. Then the mixture was carefully gas exchanged to keep stirring under argon at 110°C for around 12 hours. The mixture was filtered over a silica pad and washed the filter cake with dichloromethane, the filtrate was concentrated under reduced pressure. The residue was purified by flash chromatography (silica, 10–20 % DCM in PE, UV) to give the compound **4** (320 mg, 81%) as a white solid: mp: 240–241 °C; <sup>1</sup>H NMR (400 MHz, CDCl<sub>3</sub>)  $\delta$  7.25–7.19 (m, 4H), 7.04–6.99 (m, 4H), 6.85–6.82 (m, 4H), 6.77 (d,  $J$  = 8.0 Hz, 2H), 6.68 (d,  $J$  = 8.0 Hz, 2H), 6.59 (d,  $J$  = 8.0 Hz, 2H), 6.55 (t,  $J$  = 8.0 Hz, 2H), 6.49 (d,  $J$  = 8.0 Hz, 2H), 6.32 (d,  $J$  = 8.0 Hz, 2H), 2.43–2.32 (m, 8H), 1.05 (t,  $J$  = 8.0 Hz, 6H), 0.97 (t,  $J$  = 8.0 Hz, 6H); <sup>13</sup>C NMR (101 MHz, CDCl<sub>3</sub>)  $\delta$  162.3, 142.6, 141.3, 140.9, 140.6, 138.0, 137.9, 135.1, 133.9, 132.6, 131.7, 131.3, 130.8, 130.3, 128.0, 126.5, 126.2, 125.9, 125.2, 123.1, 119.4, 28.4, 28.4, 15.7, 15.6; HRMS (ESI)  $m/z$ : [M + H]<sup>+</sup> Calcd for C<sub>50</sub>H<sub>45</sub>O 661.3465; found 661.3465.

**5,8,11,14-Tetraethyl-19-oxabenz[5',6']tetraceno [1',12',11',10':5,6,7,8,9] tetrapheno [10,11,12,1-nopqab]pleiadene (5<sub>o</sub>)**: To a solution of compound **4** (66 mg, 0.1 mmol, 1.0 equiv) in anhydrous dichloromethane (20 mL) in an oven-dried flask with a magnetic stirring bar was added 2,3-dichloro-5,6-dicyano-1,4-benzoquinone (227 mg, 1 mmol, 10.0 equiv). The mixture was carefully exchanged into an argon atmosphere and stirred in an ice-water bath. Then trifluoromethanesulfonic acid (0.1 mL, 1.3 mmol, 13 equiv) was added dropwise to the above reaction mixture and the mixture was stirred at 0 °C for around 5 minutes. Triethyl amine (1.0 mL, 7.2 mmol, 72 equiv) was added, followed by methanol (1.0 mL, 24.7 mmol, 247 equiv) to quench the reaction and the mixture was concentrated under reduced pressure. The residue was purified by flash chromatography (silica, 10–20 % DCM in PE, UV) to give the titled compound **5<sub>o</sub>** (43 mg, 65%) as a yellow solid: <sup>1</sup>H NMR (400 MHz, CDCl<sub>3</sub>)  $\delta$  8.62 (s, 2H), 8.52 (d,  $J$  = 6.0 Hz, 2H), 8.47 (s, 2H), 8.42 (s, 4H), 7.73 (t,  $J$  = 6.0 Hz, 2H), 7.60 (d,  $J$  = 6.0 Hz, 2H), 3.10 (q,  $J$  = 8.0 Hz, 4H), 3.00 (q,  $J$  = 8.0 Hz, 4H), 1.57 (t,  $J$  = 8.0 Hz, 6H), 1.49 (t,  $J$  = 8.0 Hz, 6H); <sup>13</sup>C NMR (101 MHz, CDCl<sub>3</sub>)  $\delta$  157.4, 142.3, 142.3, 132.5, 129.9, 129.9, 129.7, 128.2, 128.1, 126.2, 123.3, 122.9, 122.8, 122.4, 122.2, 121.3, 120.8, 120.4, 120.3, 119.4, 118.2, 29.9, 29.6, 16.2, 16.0 ; HRMS (MALDI-TOF)  $m/z$ : [M]<sup>+</sup> Calcd for C<sub>50</sub>H<sub>34</sub>O 650.2605; Found 650.2614.

**Scheme S2.** Synthesis of sulfur-doped nanographenes.

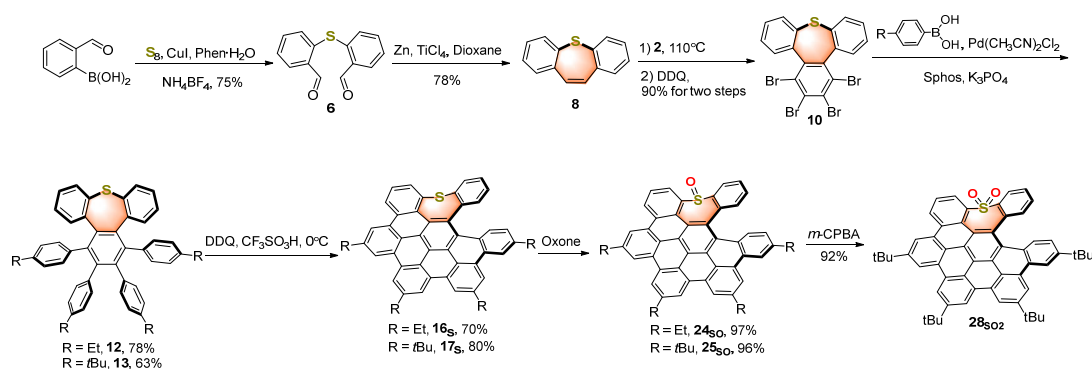

**2,2'-Thiodibenzaldehyde (6):** A mixture of sulfur  $S_8$  (192 mg, 0.75 mmol, 1.0 equiv), (2-formyl phenyl) boronic acid (2.25 g, 15.0 mmol, 20.0 equiv), CuI (114 mg, 0.6 mmol, 0.8 equiv), 1,10-phenanthroline monohydrate (120 mg, 0.6 mmol, 0.8 equiv), and  $NH_4BF_4$  (156 mg, 1.5 mmol, 2.0 equiv), in DMSO (5 mL) and  $H_2O$  (2.5 mL) was stirred at 100 °C for 18 hours. After the residue was cooled to room temperature and dissolved in EtOAc, the solution was washed with  $H_2O$  and brine and dried over anhydrous  $MgSO_4$ . The solution was concentrated under reduced pressure and purified by silica gel flash chromatography (10-20% EtOAc in PE) to give title compound **6** (1.089 g, 75%) as colorless solid. The NMR data were identical with the reported results<sup>[S2]</sup>.

**Dibenzo[b,f]thiophene (8):** To a mixture of zinc powder (1.3 g, 20 mmol, 8.0 equiv) in anhydrous THF,  $TiCl_4$  (1.1ml, 10 mmol, 4.0 equiv) was added cautiously during 10 min at 0 °C under argon atmosphere, The resulting suspension was heated at reflux for 2.5 hours. Then the mixture cooled to room temperature and 2,2'-Thiodibenzaldehyde **6** (612 mg, 2.5 mmol, 1.0 equiv) was added slowly as a dilute solution in THF over 10 minutes. After the addition was complete, the reaction mixture was heated at reflux for an additional period of 4 hours. After the mixture was cooled to room temperature, The resulting mixture was filtered over a silica pad, the filter cake was washed with EtOAc. The combined organic layers were washed with water and brine and dried with  $Na_2SO_4$ , Evaporation of the solvents in vacuo, the residue was purified by silica gel flash chromatography (PE) to give title compound **8** (410 mg, 78%) as faint yellow solid. The NMR data were identical with the reported results<sup>[S3]</sup>.

**1,2,3,4-Tetrabromotribenzo[b,d,f]thiophene (10):** A mixture of dibenzo[b,f]thiophene **8** (210 mg, 1.0 mmol, 1.0 equiv), tetrabromothiophene-S,S-dioxide **2**<sup>[S1]</sup> (647 mg, 1.5 mmol, 1.5 equiv) in toluene (5 mL) in the sealed tube was heated to 110–120 °C until no dibenzo[b,f]thiophene **8** left (around 12 hours, checked by TLC: silica, PE: DCM = 5:1, UV). Then the solvent was removed in vacuo and the residue was dissolved in dichloromethane (15 mL) and 2,3-dichloro-5,6-dicyano-1,4-benzoquinone (340 mg, 1.5 mmol, 1.5 equiv) was added, the mixture was stirred at room temperature for around 30 minutes. The reaction mixture was concentrated under reduced pressure and purified by silica gel flash chromatography (10-20% DCM in PE) to give the compound **10** (519 mg, 90% for two steps) as a colorless solid: mp: 198–199 °C; <sup>1</sup>H

NMR (400 MHz, CDCl<sub>3</sub>)  $\delta$  7.60 (dd,  $J$  = 6.0, 1.5 Hz, 2H), 7.50 (dd,  $J$  = 6.0, 1.5 Hz, 2H), 7.26–7.19 (m, 4H); <sup>13</sup>C NMR (101 MHz, CDCl<sub>3</sub>)  $\delta$  141.9, 141.4, 140.7, 132.9, 132.3, 129.6, 128.9, 127.3, 126.3; HRMS (MALDI-TOF)  $m/z$ : [M+H]<sup>+</sup> Calcd for C<sub>18</sub>H<sub>9</sub>Br<sub>4</sub>S 572.7153; Found 572.7176.

**1,2,3,4-Tetrakis(4-ethyl phenyl)tribenzo[b,d,f]thiepine (12)**: To a solution of thiepine **10** (460 mg, 0.8 mmol, 1.0 equiv) in toluene (15 mL) was quickly added (4-ethyl phenyl)boronic acid (980 mg, 6.4 mmol, 8.0 equiv), palladium(II) chloride diacetonitrile complex (31 mg, 0.12 mmol, 0.15 equiv), 2-dicyclohexylphosphino-2,6-dimethoxy-1,1-biphenyl (SPhos, 123 mg, 0.24 mmol, 0.3 equiv) and potassium phosphate tribasic (2.71 g, 12.8 mmol, 16.0equiv) under argon atmosphere. Then the mixture was carefully gas exchanged to keep stirring under argon at 110°C for around 12 hours. The mixture was filtered through a silica pad and washed the filter cake with dichloromethane, the filtrate was concentrated under reduced pressure and purified by flash chromatography (silica, 10–20 % DCM in PE, UV) to give the compound **12** (422 mg, 78%) as a white solid: mp: 300–301 °C; <sup>1</sup>H NMR (400 MHz, CDCl<sub>3</sub>)  $\delta$  7.52 (d,  $J$  = 8.0 Hz, 2H), 7.28 (d,  $J$  = 8.0 Hz, 2H), 7.01 (d,  $J$  = 8.0 Hz, 2H), 6.91–6.88 (m, 6H), 6.73 (d,  $J$  = 8.0 Hz, 2H), 6.67 (t,  $J$  = 8.0 Hz, 2H), 6.60 (d,  $J$  = 8.0 Hz, 2H), 6.51 (d,  $J$  = 8.0 Hz, 2H), 6.46 (d,  $J$  = 8.0 Hz, 2H), 6.40 (d,  $J$  = 8.0 Hz, 2H), 2.42–2.34 (m, 8H), 1.04–0.98 (m, 12H); <sup>13</sup>C NMR (101 MHz, CDCl<sub>3</sub>)  $\delta$  141.9, 141.9, 141.4, 141.0, 140.9, 140.1, 139.1, 138.1, 137.9, 133.8, 132.3, 131.9, 131.2, 130.9, 130.4, 126.5, 126.3, 126.3, 125.7, 125.3, 28.4, 15.6, 15.6; HRMS (MALDI-TOF)  $m/z$ : [M]<sup>+</sup> Calcd for C<sub>50</sub>H<sub>44</sub>S 676.3159; Found 676.3140.

**1,2,3,4-Tetrakis(4-(tert-butyl)phenyl)tribenzo[b,d,f]thiepine (13)**: To a solution of thiepine **10** (460mg, 0.8 mmol, 1.0 equiv) in xylene (15 mL) was quickly added (4-(tert-butyl)phenyl)boronic acid (1140 mg, 6.4 mmol, 8.0 equiv), palladium (II) chloride diacetonitrile complex (31 mg, 0.12 mmol, 0.15 equiv), 2-dicyclohexylphosphino-2,6-dimethoxy-1,1-biphenyl (SPhos, 99 mg, 0.24 mmol, 0.3 equiv) and potassium phosphate tribasic (2.71 g, 12.8 mmol, 16.0equiv) under argon atmosphere. Then the mixture was carefully gas exchanged to keep stirring under argon at 140°C for around 24 hours. The mixture was filtered through a silica pad and washed the filter cake with dichloromethane, the filtrate was concentrated under reduced pressure and purified by flash chromatography (silica, 10–20 % DCM in PE, UV) to give the compound **13** (397 mg, 63%) as a white solid: mp: 276–277 °C; <sup>1</sup>H NMR (400 MHz, CDCl<sub>3</sub>)  $\delta$  7.51 (d,  $J$  = 8.0 Hz, 2H), 7.28 (d,  $J$  = 8.0 Hz, 2H), 7.02–7.00 (br, 4H), 6.91–6.85 (m, 6H), 6.76 (d,  $J$  = 8.0 Hz, 2H), 6.66–6.62 (m, 4H), 6.45 (d,  $J$  = 8.0 Hz, 2H), 6.37 (d,  $J$  = 8.0 Hz, 2H), 1.10 (s, 18H), 1.07 (s, 18H); <sup>13</sup>C NMR (101 MHz, CDCl<sub>3</sub>)  $\delta$  147.8, 147.6, 141.9, 141.8, 141.4, 140.1, 139.0, 137.8, 137.6, 133.8, 132.1, 131.6, 131.2, 130.4, 130.2, 126.4, 126.3, 123.4, 123.1, 122.4, 34.1, 34.0, 31.2, 31.1; HRMS (MALDI-TOF)  $m/z$ : [M]<sup>+</sup> Calcd for C<sub>58</sub>H<sub>60</sub>S 788.4411; Found 788.4423.

**3,6,9,12-Tetraethylbenzo[f]naphtho[1',2',3',4':12,13] phenanthro[1',10',9',8':5,6,7,8] piceno[1,14-bcd]thiepine (16s)**: To a solution of compound **12** (68 mg, 0.1 mmol, 1.0 equiv) in anhydrous dichloromethane (15 mL) in an oven-dried flask with a magnetic stirring bar was

added 2,3-dichloro-5,6-dicyano-1,4-benzoquinone (227 mg, 1 mmol, 10.0 equiv). The mixture was carefully exchanged into an argon atmosphere and stirred in an ice-water bath. Then trifluoromethanesulfonic acid (0.1 mL, 1.3 mmol, 13 equiv) was added dropwise to the above reaction mixture and the mixture was stirred at 0 °C for around 3 minutes. Triethyl amine (1.0 mL, 7.2 mmol, 72 equiv) was added, followed by methanol (1.0 mL, 24.7 mmol, 247 equiv) to quench the reaction and the mixture was concentrated under reduced pressure and purified by flash chromatography (silica, 10–20 % DCM in PE, UV) to give the title compound **16s** (48 mg, 70%) as a yellow solid: <sup>1</sup>H NMR (400 MHz, CDCl<sub>3</sub>) δ 8.91 (s, 2H), 8.84 (s, 1H), 8.82 (s, 1H), 8.79 (d, *J* = 6.0 Hz, 1H), 8.78 (s, 1H), 8.65 (s, 1H), 8.57 (s, 1H), 8.16 (d, *J* = 6.0 Hz, 1H), 8.09 (d, *J* = 8.0 Hz, 1H), 7.88 (d, *J* = 6.0 Hz, 1H), 7.68 (t, *J* = 6.0 Hz, 1H), 7.29 (t, *J* = 6.0 Hz, 1H), 7.12 (d, *J* = 6.0 Hz, 1H), 6.88 (t, *J* = 6.0 Hz, 1H), 6.27 (d, *J* = 6.0 Hz, 1H), 3.27–3.14 (m, 6H), 2.87 (q, *J* = 8.0 Hz, 2H), 1.62 (t, *J* = 8.0 Hz, 6H), 1.55 (t, *J* = 8.0 Hz, 3H), 1.40 (t, *J* = 8.0 Hz, 3H); <sup>13</sup>C NMR (101 MHz, CDCl<sub>3</sub>) δ 149.3, 142.5, 142.3, 142.2, 142.2, 137.9, 137.5, 134.7, 133.4, 133.2, 132.8, 132.3, 131.5, 131.4, 130.7, 130.4, 130.3, 130.2, 130.1, 129.8, 129.8, 129.1, 128.3, 128.1, 127.8, 127.1, 126.7, 126.3, 124.6, 123.3, 123.0, 123.0, 122.9, 122.7, 122.5, 121.9, 121.7, 121.4, 121.2, 121.1, 120.8, 30.0, 29.8, 29.8, 29.1, 16.5, 16.3, 15.6; HRMS (MALDI-TOF) *m/z*: [M]<sup>+</sup> Calcd for C<sub>50</sub>H<sub>36</sub>S 668.2533; Found 668.2552.

**3,6,9,12-tetra-*tert*-butylbenzo[*f*]naphtha [1',2',3',4':12,13]phenanthro [1',10',9',8':5,6,7,8]piceno[1,14-*bcd*]thiepine (17s)**: To a solution of compound **13** (80 mg, 0.1 mmol, 1.0 equiv) in anhydrous dichloromethane (10 mL) in an oven-dried flask with a magnetic stirring bar was added 2,3-dichloro-5,6-dicyano-1,4-benzoquinone (227 mg, 1.0 mmol, 10.0 equiv). The mixture was carefully exchanged into an argon atmosphere and stirred in an ice-water bath. Then trifluoromethanesulfonic acid (0.1 mL, 1.3 mmol, 13 equiv) was added dropwise to the above reaction mixture and the mixture was stirred at 0 °C for around 2 minutes. Triethyl amine (1.0 mL, 7.2 mmol, 72 equiv) was added, followed by methanol (1.0 mL, 24.7 mmol, 247 equiv) to quench the reaction and the mixture was concentrated under reduced pressure and purified by flash chromatography (silica, 10–20 % DCM in PE, UV) to give the title compound **17s** (63 mg, 80%) as a yellow solid: <sup>1</sup>H NMR (400 MHz, CDCl<sub>3</sub>) δ 9.22 (s, 1H), 9.18 (s, 1H), 9.13 (s, 1H), 9.09 (s, 1H), 9.03 (s, 1H), 8.91 (s, 1H), 8.83 (d, *J* = 6.0 Hz, 1H), 8.78 (s, 1H), 8.19 (d, *J* = 6.0 Hz, 1H), 8.09 (d, *J* = 8.0 Hz, 1H), 7.89 (d, *J* = 6.0 Hz, 1H), 7.72 (t, *J* = 6.0 Hz, 1H), 7.33–7.29 (m, 2H), 6.90 (t, *J* = 6.0 Hz, 1H), 6.31 (d, *J* = 6.0 Hz, 1H), 1.79 (s, 9H), 1.77 (s, 9H), 1.71 (s, 9H), 1.50 (s, 9H); <sup>13</sup>C NMR (101 MHz, CDCl<sub>3</sub>) δ 149.3, 149.2, 149.1, 149.1, 137.8, 135.1, 133.6, 133.5, 132.8, 132.6, 131.3, 131.1, 130.8, 130.5, 130.4, 130.4, 130.2, 130.1, 129.9, 128.9, 128.5, 128.3, 127.9, 127.3, 127.0, 124.8, 124.2, 123.6, 123.2, 123.1, 123.0, 122.7, 121.3, 119.9, 119.1, 119.0, 118.3, 35.7, 35.7, 35.60, 35.0, 32.0, 31.9, 31.9, 31.4; HRMS (MALDI-TOF) *m/z*: [M+H]<sup>+</sup> Calcd for C<sub>58</sub>H<sub>53</sub>S 781.3862; Found 781.3881.

**(17R)-3,6,9,12-Tetraethylbenzo[*f*]naphtha [1',2',3',4':12,13]phenanthro [1',10',9',8':5,6,7,8]piceno[1,14-*bcd*]thiepine 17-oxide (24<sub>SO</sub>)**: To a solution of compound **16s** (34 mg, 0.05 mmol, 1.0 equiv) in anhydrous dichloromethane (5 mL) in an oven-dried flask

with a magnetic stirring bar was added 2KHSO<sub>5</sub>.KHSO<sub>4</sub>.K<sub>2</sub>SO<sub>4</sub>, (Oxone, 307 mg, 0.5 mmol, 10.0 equiv). The mixture was stirred for 2 hours in room temperature. 10% aqueous sodium sulfite solution (1.4 mL, 1.0 mmol, 20 equiv) was added to quench the reaction and the mixture was concentrated under reduced pressure and purified by flash chromatography (silica, 30-50 % PE in DCM, UV) to give the title compound **24<sub>SO</sub>** (33 mg, 97%) as a yellow solid: <sup>1</sup>H NMR (400 MHz, CDCl<sub>3</sub>) δ 8.82 (d, *J* = 6.0 Hz, 1H), 8.78 (s, 1H), 8.76 (s, 1H), 8.70 (s, 1H), 8.68 (s, 1H), 8.61 (s, 1H), 8.58 (s, 2H), 8.43 (d, *J* = 6.0 Hz, 1H), 8.04 (d, *J* = 6.0 Hz, 1H), 8.01 (d, *J* = 6.0 Hz, 1H), 7.95 (t, *J* = 6.0 Hz, 1H), 7.52–7.48 (m, 1H), 7.14 (d, *J* = 6.0 Hz, 1H), 6.93 (t, *J* = 6.0 Hz, 1H), 6.19 (d, *J* = 6.0 Hz, 1H), 3.22 (q, *J* = 8.0 Hz, 2H), 3.15 (q, *J* = 8.0 Hz, 2H), 2.98 (q, *J* = 8.0 Hz, 2H), 2.92 (q, *J* = 8.0 Hz, 6H), 1.62 (t, *J* = 8.0 Hz, 3H), 1.52 (t, *J* = 8.0 Hz, 6H), 1.44 (t, *J* = 8.0 Hz, 3H); <sup>13</sup>C NMR (101 MHz, CDCl<sub>3</sub>) δ 145.5, 144.6, 143.1, 143.0, 142.8, 136.3, 133.2, 132.4, 131.6, 131.1, 130.6, 130.4, 130.2, 130.0, 129.5, 129.2, 128.6, 128.4, 127.8, 126.5, 125.0, 124.9, 124.7, 123.2, 122.6, 122.3, 122.2, 122.1, 121.9, 121.5, 121.4, 121.1, 118.9, 118.5, 30.1, 29.9, 29.7, 29.1, 16.4, 16.2, 16.2, 15.6; HRMS (MALDI-TOF) *m/z*: [M+H]<sup>+</sup> Calcd for C<sub>50</sub>H<sub>37</sub>OS 685.2560; Found 685.2543.

**(17R)-3,6,9,12-Tetra-*tert*-butylbenzo[f]naphtha [1',2',3',4':12,13]phenanthro [1',10',9',8':5,6,7,8] piceno [1,14-bcd]thiepine 17-oxide (25<sub>SO</sub>)**: To a solution of compound **17<sub>S</sub>** (38 mg, 0.05 mmol, 1.0 equiv) in anhydrous dichloromethane (5 mL) in an oven-dried flask with a magnetic stirring bar was added 2KHSO<sub>5</sub>.KHSO<sub>4</sub>.K<sub>2</sub>SO<sub>4</sub>, (Oxone, 307 mg, 0.5 mmol, 10.0 equiv). The mixture was stirred for 2 hours in room temperature. 10% aqueous sodium sulfite solution (1.4 mL, 1.0 mmol, 20 equiv) was added to quench the reaction and the mixture was concentrated under reduced pressure and purified by flash chromatography (silica, 30-50 % PE in DCM, UV) to give the title compound **25<sub>SO</sub>** (38 mg, 96%) as a yellow solid: <sup>1</sup>H NMR (400 MHz, CDCl<sub>3</sub>) δ 9.24 (s, 1H), 9.21 (s, 1H), 9.17 (s, 1H), 9.15 (s, 1H), 9.07 (s, 1H), 8.99 (s, 1H), 8.98 (d, *J* = 6.0 Hz, 1H), 8.82 (s, 1H), 8.49 (d, *J* = 6.0 Hz, 1H), 8.11–8.08 (m, 2H), 8.03 (t, *J* = 8.0 Hz, 1H), 7.57 (t, *J* = 6.0 Hz, 1H), 7.35 (d, *J* = 6.0 Hz, 1H), 7.02 (t, *J* = 6.0 Hz, 1H), 6.38 (d, *J* = 6.0 Hz, 1H), 1.80 (s, 9H), 1.77 (s, 9H), 1.72 (s, 9H), 1.51 (s, 9H); <sup>13</sup>C NMR (101 MHz, CDCl<sub>3</sub>) δ 150.0, 149.7, 145.5, 145.0, 136.2, 133.2, 132.9, 131.5, 130.7, 130.7, 130.6, 130.5, 130.4, 130.2, 129.9, 129.6, 129.2, 128.8, 128.6, 128.2, 128.0, 125.3, 125.0, 124.5, 123.5, 123.3, 122.8, 122.4, 122.3, 120.4, 119.4, 119.3, 119.2, 119.2, 119.1, 119.0, 118.7, 118.6, 35.7, 35.7, 35.7, 35.0, 31.9, 31.9, 31.8, 31.3; HRMS (ESI) *m/z*: [M + H]<sup>+</sup> Calcd for C<sub>58</sub>H<sub>53</sub>OS 797.3812; found 797.3833.

**3,6,9,12-Tetra-*tert*-butylbenzo[f]naphtha [1',2',3',4':12,13]phenanthro [1',10',9',8':5,6,7,8] piceno[1,14-bcd]thiepine 17,17-dioxide (28<sub>SO2</sub>)**: To a solution of compound **25<sub>SO</sub>** (40 mg, 0.05 mmol, 1.0 equiv) in anhydrous dichloromethane (5 mL) in an oven-dried flask with a magnetic stirring bar was added *m*-chloroperbenzoic acid (*m*-CPBA, 34 mg, 0.2 mmol, 4.0 equiv). The mixture was stirred for 24 hours in room temperature. 10% aqueous sodium sulfite solution (0.6 mL, 0.4 mmol, 8.0 equiv) was added to quench the reaction and the mixture was concentrated under reduced pressure and purified by flash chromatography (silica, 30-50 % PE in DCM, UV)

to give the title compound **28**<sub>SeO<sub>2</sub></sub> (37 mg, 92%) as a yellow solid: <sup>1</sup>H NMR (600 MHz, CDCl<sub>3</sub>) δ 9.22 (s, 1H), 9.19 (d, *J* = 6.0 Hz, 1H), 9.17 (s, 2H), 9.15 (s, 1H), 9.03 (s, 1H), 8.96 (s, 1H), 8.76 (d, *J* = 6.0 Hz, 1H), 8.74 (s, 1H), 8.37 (d, *J* = 6.0 Hz, 1H), 8.17 (d, *J* = 8.0 Hz, 1H), 7.95 (t, *J* = 8.0 Hz, 1H), 7.55 (t, *J* = 8.0 Hz, 1H), 7.29 (d, *J* = 6.0 Hz, 1H), 7.17 (d, *J* = 6.0 Hz, 1H), 6.63 (d, *J* = 6.0 Hz, 1H), 1.80 (s, 9H), 1.76 (s, 9H), 1.72 (s, 9H), 1.48 (s, 9H); <sup>13</sup>C NMR (151 MHz, CDCl<sub>3</sub>) δ 149.8, 149.7, 149.5, 149.5, 141.7, 141.3, 140.2, 135.7, 134.6, 133.6, 132.4, 132.0, 131.5, 131.0, 130.5, 130.4, 130.2, 130.0, 129.3, 128.8, 128.7, 128.6, 128.1, 127.2, 126.9, 126.2, 124.3, 124.3, 124.1, 123.8, 123.3, 123.0, 122.2, 121.8, 120.9, 119.4, 119.2, 119.2, 119.1, 119.0, 118.4, 35.7, 35.7, 35.6, 34.9, 31.9, 31.9, 31.8, 31.3; HRMS (ESI) *m/z*: [M + H]<sup>+</sup> Calcd for C<sub>58</sub>H<sub>53</sub>O<sub>2</sub>S 813.3761; found 813.3762.

**Scheme S3.** Synthesis of selenium-doped nanographenes.

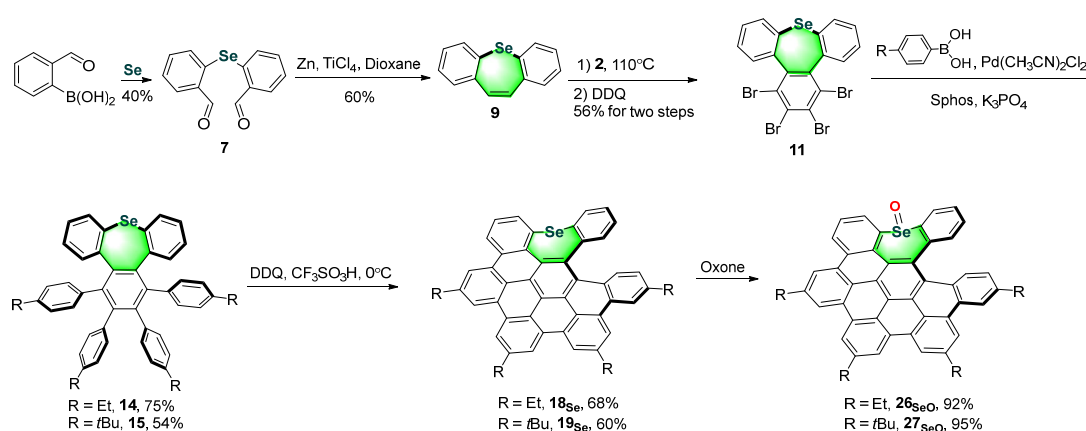

**2,2'-Selenodibenzaldehyde (7):** A mixture of selenium Se (474 mg, 6.0 mmol, 1.0 equiv), (2-2-formyl phenyl)boronic acid (2.25 g, 15.0 mmol, 2.5 equiv), CuI (114 mg, 0.6 mmol, 0.1 equiv), 1,10-phenanthroline monohydrate (120 mg, 0.6 mmol, 0.1 equiv), and NH<sub>4</sub>BF<sub>4</sub> (156 mg, 1.5 mmol, 0.25 equiv), in DMSO (0.2 mL) and H<sub>2</sub>O (0.1 mL) was stirred at 100 °C for 18 hours. After the residue was dissolved in EtOAc, the solution was washed with H<sub>2</sub>O and brine and dried over MgSO<sub>4</sub>. The solution was concentrated under reduced pressure. The residue was purified by silica gel flash chromatography (10-20% EtOAc in PE) to give the title compound **7** (693 mg, 40%) as colorless solid. The NMR data were identical with the reported results<sup>[S2]</sup>.

**Dibenzo[*b,f*]selenepine (9):** To a mixture of zinc powder (1.30 g, 20 mmol, 8.0 equiv) in anhydrous THF, TiCl<sub>4</sub> (1.1 ml, 10.0 mmol, 4.0 equiv) was added cautiously during 10 min at 0°C under argon atmosphere, The resulting suspension was heated at reflux for 2.5 h. Then the mixture cooled to room temperature and 2,2'-selenodibenzaldehyde **7** (723 mg, 2.5 mmol, 1.0 equiv) was added slowly as a dilute solution in THF over 10 minutes. After the addition was completed, the reaction mixture was heated at reflux for an additional period of 4 h. After the mixture was cooled to room temperature, The resulting mixture was filtered over a silica pad and washed filter cake with EtOAc. The combined organic layers were washed with water and brine and dried over Na<sub>2</sub>SO<sub>4</sub>. Evaporation of the solvents in vacuo, the residue was purified by



silica gel flash chromatography (PE) to give title compound **9** (385 mg, 60%) as a faint yellow solid. The NMR data were identical with the reported results<sup>[S4]</sup>.

**1,2,3,4-Tetrabromotribenzo[b,d,f]selenepine (11)**: A mixture of dibenzo[b,f]selenepine **9** (257 mg, 1.0 mmol, 1.0 equiv), tetrabromothiophene-S,S-dioxide **2**<sup>[S1]</sup> (647 mg, 1.5 mmol, 1.5 equiv) in xylene (5 mL) in the sealed tube was heated to 140 °C until no dibenzo[b,f]selenepine **9** left (around 12 hours, checked by TLC: silica, PE: DCM = 5:1, UV). Then the mixture was cooled to room temperature and 2,3-Dichloro-5,6-dicyano-1,4-benzoquinone (340 mg, 1.5 mmol, 1.5 equiv) was added, the mixture was heated to 90 °C and stirred for around 30 minutes. The reaction mixture was concentrated under reduced pressure and purified by silica gel flash chromatography (10-20% DCM in PE) to give the compound **11** (348 mg, 56% for two steps) as a colorless solid: mp: 210–211 °C; <sup>1</sup>H NMR (400 MHz, CDCl<sub>3</sub>) δ 7.73 (d, *J* = 6.0 Hz, 2H), 7.43 (d, *J* = 6.0 Hz, 2H), 7.24 (t, *J* = 6.0 Hz, 2H), 7.15 (t, *J* = 6.0 Hz, 2H); <sup>13</sup>C NMR (101 MHz, CDCl<sub>3</sub>) δ 143.2, 141.3, 137.3, 134.0, 132.5, 129.4, 128.5, 127.5, 126.4; HRMS (MALDI-TOF) *m/z*: [M+H]<sup>+</sup> Calcd for C<sub>18</sub>H<sub>9</sub>Br<sub>4</sub>Se 620.6597; Found 620.6584.

**1,2,3,4-Tetrakis(4-ethylphenyl)tribenzo[b,d,f]selenepine (14)**: To a solution of selenepine **11** (498mg, 0.8 mmol, 1.0 equiv) in toluene (15 mL) was quickly added (4-ethyl phenyl)boronic acid (980 mg, 6.4 mmol, 8.0 equiv), palladium(II) chloride diacetonitrile complex (31 mg, 0.12 mmol, 0.15 equiv), 2-dicyclohexylphosphino-2,6-dimethoxy-1,1-biphenyl (SPhos, 99 mg, 0.24 mmol, 0.3 equiv) and potassium phosphate tribasic (2.71 g, 12.8 mmol, 16.0equiv) under argon atmosphere. Then the mixture was carefully gas exchanged to keep stirring under argon at 110°C for around 12 hours. The mixture was filtered through a silica pad and washed the filter cake with dichloromethane, the filtrate was concentrated under reduced pressure and purified by flash chromatography (silica, 10–20 % DCM in PE, UV) to give the compound **14** (434 mg, 75%) as a white solid: <sup>1</sup>H NMR (600 MHz, CDCl<sub>3</sub>) δ 7.55 (d, *J* = 8.0 Hz, 2H), 7.18 (d, *J* = 8.0 Hz, 2H), 6.91 (d, *J* = 8.0 Hz, 2H), 6.82 (d, *J* = 8.0 Hz, 2H), 6.75 (d, *J* = 8.0 Hz, 2H), 6.72 (t, *J* = 8.0 Hz, 2H), 6.63 (d, *J* = 8.0 Hz, 2H), 6.58 (t, *J* = 8.0 Hz, 2H), 6.49 (d, *J* = 8.0 Hz, 2H), 6.42 (d, *J* = 8.0 Hz, 2H), 6.36 (d, *J* = 8.0 Hz, 2H), 6.32 (d, *J* = 8.0 Hz, 2H), 2.30–2.25 (m, 8H), 0.93–0.89 (m, 12H); <sup>13</sup>C NMR (151 MHz, CDCl<sub>3</sub>) δ 141.8, 141.6, 140.8, 140.8, 140.2, 139.9, 138.1, 138.0, 137.9, 133.6, 132.8, 132.2, 131.8, 130.8, 130.4, 126.6, 126.2, 126.2, 126.0, 125.6, 125.3, 28.33, 15.56, 15.51; HRMS (MALDI-TOF) *m/z*: [M]<sup>+</sup> Calcd for C<sub>50</sub>H<sub>44</sub>Se 724.2603; Found 724.2570.

**1,2,3,4-Tetrakis(4-(tert-butyl)phenyl)tribenzo[b,d,f]selenepine (15)**: To a solution of selenepine **11** (498 mg, 0.8 mmol, 1.0 equiv) in xylene (15 mL) was quickly added (4-(tert-butyl)phenyl)boronic acid (1.14 g, 6.4 mmol, 8.0 equiv), palladium(II) chloride diacetonitrile complex (31 mg, 0.12 mmol, 0.15 equiv), 2-dicyclohexylphosphino-2,6-dimethoxy-1,1-biphenyl (SPhos, 99 mg, 0.24 mmol, 0.3 equiv) and potassium phosphate tribasic (2.71 g, 12.8 mmol, 16.0 equiv) under argon atmosphere. Then the mixture was carefully gas exchanged to keep stirring under argon at 140°C for around 24 hours. The mixture was filtered through a silica pad and washed the filter cake with dichloromethane, the filtrate was concentrated under

reduced pressure and purified by flash chromatography (silica, 10–20 % DCM in PE, UV) to give the compound **15** (361 mg, 54%) as a white solid:  $^1\text{H NMR}$  (600 MHz,  $\text{CDCl}_3$ )  $\delta$  7.63 (d,  $J = 8.0$  Hz, 2H), 7.27 (d,  $J = 8.0$  Hz, 2H), 6.99 (t,  $J = 8.0$  Hz, 4H), 6.90 (d,  $J = 8.0$  Hz, 2H), 6.83 (d,  $J = 8.0$  Hz, 2H), 6.78 (t,  $J = 8.0$  Hz, 2H), 6.75 (d,  $J = 8.0$  Hz, 2H), 6.67–6.63 (m, 4H), 6.44 (d,  $J = 8.0$  Hz, 2H), 6.38 (d,  $J = 8.0$  Hz, 2H), 1.09 (s, 18H), 1.07 (s, 18H);  $^{13}\text{C NMR}$  (101 MHz,  $\text{CDCl}_3$ )  $\delta$  147.7, 147.6, 141.7, 141.6, 140.1, 140.0, 138.0, 137.7, 137.6, 133.7, 132.8, 132.0, 131.6, 130.3, 130.2, 126.5, 126.0, 123.4, 123.3, 123.0, 122.4, 34.0, 34.0, 31.2, 31.1; HRMS (MALDI-TOF)  $m/z$ :  $[\text{M}]^+$  Calcd for  $\text{C}_{58}\text{H}_{60}\text{Se}$  836.3855 Found 836.3827.

**3,6,9,12-Tetraethylbenzo[f]naphtho [1',2',3',4':12,13] phenanthro [1',10',9',8':5,6,7,8] piceno [1,14-bcd]selenepine (18<sub>se</sub>)**: To a solution of compound **14** (73 mg, 0.1 mmol, 1.0 equiv) in anhydrous dichloromethane (15 mL) in an oven-dried flask with a magnetic stirring bar was added 2,3-dichloro-5,6-dicyano-1,4-benzoquinone (227 mg, 1.0 mmol, 10.0 equiv). The mixture was carefully exchanged into an argon atmosphere and stirred in an ice-water bath. Then trifluoromethanesulfonic acid (0.1 mL, 1.3 mmol, 13 equiv) was added dropwise to the above reaction mixture and the mixture was stirred at 0 °C for around 3 minutes. Triethyl amine (1.0 mL, 7.2 mmol, 72 equiv) was added, followed by methanol (1.0 mL, 24.7 mmol, 247 equiv) to quench the reaction and the mixture was concentrated under reduced pressure and purified by flash chromatography (silica, 10–20 % DCM in PE, UV) to give the title compound **18<sub>se</sub>** (48 mg, 68%) as a yellow solid:  $^1\text{H NMR}$  (400 MHz,  $\text{CDCl}_3$ )  $\delta$  8.80 (s, 1H), 8.75 (s, 1H), 8.73 (s, 1H), 8.66 (d,  $J = 6.0$  Hz, 1H), 8.65 (s, 2H), 8.55 (s, 1H), 8.49 (s, 1H), 8.23 (d,  $J = 6.0$  Hz, 1H), 8.17 (d,  $J = 6.0$  Hz, 1H), 7.94 (d,  $J = 6.0$  Hz, 1H), 7.51 (t,  $J = 6.0$  Hz, 1H), 7.19 (t,  $J = 6.0$  Hz, 1H), 7.11 (dd,  $J = 6.0, 1.5$  Hz, 1H), 6.81 (t,  $J = 6.0$  Hz, 1H), 6.12 (d,  $J = 6.0$  Hz, 1H), 3.21 (q,  $J = 8.0$  Hz, 2H), 3.11–3.03 (m, 4H), 2.88 (q,  $J = 8.0$  Hz, 2H), 1.60 (t,  $J = 8.0$  Hz, 3H), 1.54 (t,  $J = 8.0$  Hz, 3H), 1.49 (t,  $J = 8.0$  Hz, 3H), 1.41 (t,  $J = 8.0$  Hz, 3H);  $^{13}\text{C NMR}$  (101 MHz,  $\text{CDCl}_3$ )  $\delta$  150.1, 142.5, 142.3, 142.3, 142.2, 135.4, 134.7, 134.6, 134.0, 133.3, 133.2, 132.5, 131.5, 131.4, 131.3, 130.7, 130.5, 130.4, 130.1, 129.9, 129.8, 129.1, 128.1, 128.0, 127.8, 127.7, 127.1, 126.3, 124.6, 123.4, 123.0, 123.0, 122.8, 122.6, 121.9, 121.7, 121.5, 121.4, 121.1, 120.9, 120.8, 30.0, 29.8, 29.8, 29.1, 16.5, 16.3, 15.6; HRMS (MALDI-TOF)  $m/z$ :  $[\text{M}+\text{H}]^+$  Calcd for  $\text{C}_{50}\text{H}_{37}\text{Se}$  717.2055 Found 717.2069.

**3,6,9,12-tetra-tert-butylbenzo[f]naphtho[1',2',3',4':12,13] phenanthro[1',10',9',8':5,6,7,8] piceno[1,14-bcd]selenepine (19<sub>se</sub>)**: To a solution of compound **15** (84 mg, 0.1 mmol, 1.0 equiv) in anhydrous dichloromethane (10 mL) in an oven-dried flask with a magnetic stirring bar was added 2,3-dichloro-5,6-dicyano-1,4-benzoquinone (227 mg, 1 mmol, 10.0 equiv). The mixture was carefully exchanged into an argon atmosphere and stirred in an ice-water bath. Then trifluoromethanesulfonic acid (0.1 mL, 1.3 mmol, 13.0 equiv) was added dropwise to the above reaction mixture and the mixture was stirred at 0 °C for around 2 minutes. Triethyl amine (1.0 mL, 7.2 mmol, 72 equiv) was added, followed by methanol (1.0 mL, 24.7 mmol, 247 equiv) to quench the reaction and the mixture was concentrated under reduced pressure and purified by flash chromatography (silica, 10–20 % DCM in PE, UV) to give the title compound **16<sub>s</sub>** (50

mg, 60%) as yellow solid:  $^1\text{H}$  NMR (400 MHz,  $\text{CDCl}_3$ )  $\delta$  9.22 (s, 1H), 9.18 (s, 1H), 9.12 (s, 1H), 9.07 (s, 1H), 9.04 (s, 1H), 8.91 (s, 1H), 8.83 (d,  $J = 6.0$  Hz, 1H), 8.80 (s, 1H), 8.34 (d,  $J = 6.0$  Hz, 1H), 8.19 (d,  $J = 8.0$  Hz, 1H), 8.00 (d,  $J = 6.0$  Hz, 1H), 7.65 (t,  $J = 6.0$  Hz, 1H), 7.33 (d,  $J = 6.0$  Hz, 1H), 7.26 (t,  $J = 6.0$  Hz, 1H), 6.88 (t,  $J = 6.0$  Hz, 1H), 6.24 (d,  $J = 6.0$  Hz, 1H), 1.80 (s, 9H), 1.77 (s, 9H), 1.71 (s, 9H), 1.50 (s, 9H);  $^{13}\text{C}$  NMR (101 MHz,  $\text{CDCl}_3$ )  $\delta$  149.9, 149.2, 149.1, 149.1, 135.7, 134.8, 134.4, 133.7, 133.3, 132.9, 131.6, 131.4, 130.9, 130.8, 130.5, 130.3, 130.1, 129.9, 129.0, 128.3, 128.2, 127.8, 127.3, 124.9, 124.2, 123.6, 123.2, 123.1, 122.8, 121.1, 120.0, 119.1, 119.0, 119.0, 118.9, 118.3, 35.7, 35.7, 35.6, 34.9, 32.0, 31.9, 31.9, 31.4; HRMS (MALDI-TOF)  $m/z$ :  $[\text{M}+\text{H}]^+$  Calcd for  $\text{C}_{58}\text{H}_{53}\text{Se}$  829.3307 Found 829.3304.

### 3,6,9,12-

**Tetraethylbenzo[f]naphtho[1',2',3',4':12,13]phenanthro[1',10',9',8':5,6,7,8]piceno[1,14-bcd]selenepine 17-oxide (26<sub>SeO</sub>):** To a solution of compound **18<sub>Se</sub>** (36 mg, 0.05 mmol, 1.0 equiv) in anhydrous dichloromethane (10 mL) in an oven-dried flask with a magnetic stirring bar was added 2KHSO<sub>5</sub>.KHSO<sub>4</sub>.K<sub>2</sub>SO<sub>4</sub> (Oxone, 307 mg, 0.5 mmol, 10.0 equiv). The mixture was stirred for 2 hours in room temperature. 10% aqueous sodium sulfite solution (1.4 mL, 1.0 mmol, 20 equiv) was added to quench the reaction and the mixture was concentrated under reduced pressure. The residue was purified by flash chromatography (silica, 30-50 % PE in EA, UV) to give the title compound **26<sub>SeO</sub>** (34 mg, 92%) as a yellow solid:  $^1\text{H}$  NMR (400 MHz,  $\text{CDCl}_3$ )  $\delta$  8.73 (s, 1H), 8.66 (d,  $J = 6.0$  Hz, 1H), 8.60 (s, 2H), 8.44 (s, 1H), 8.40 (s, 2H), 8.35 (s, 1H), 8.25 (s, 1H), 7.99 (d,  $J = 6.0$  Hz, 1H), 7.84 (d,  $J = 6.0$  Hz, 2H), 7.43 (t,  $J = 6.0$  Hz, 1H), 7.08 (d,  $J = 6.0$  Hz, 1H), 6.83 (t,  $J = 6.0$  Hz, 1H), 5.93 (d,  $J = 6.0$  Hz, 1H), 3.29–3.23 (m, 2H), 3.13 (br, 2H), 2.95 (q,  $J = 8.0$  Hz, 2H), 2.78 (q,  $J = 8.0$  Hz, 2H), 1.63 (t,  $J = 8.0$  Hz, 3H), 1.51–1.41 (m, 9H);  $^{13}\text{C}$  NMR (101 MHz,  $\text{CDCl}_3$ )  $\delta$  143.1, 142.9, 142.7, 142.5, 133.3, 131.6, 130.5, 130.3, 130.2, 129.8, 129.8, 129.5, 128.8, 128.1, 127.7, 126.6, 126.2, 125.3, 123.0, 122.9, 122.3, 122.2, 122.1, 122.0, 122.0, 121.9, 121.2, 121.1, 121.0, 120.3, 30.0, 29.8, 29.5, 29.1, 16.4, 16.1, 16.0, 15.6; HRMS (MALDI-TOF)  $m/z$ :  $[\text{M}+\text{H}]^+$  Calcd for  $\text{C}_{50}\text{H}_{37}\text{OSe}$  733.2004 Found 733.2020.

### 3,6,9,12-Tetra-tert-

**butylbenzo[f]naphtho[1',2',3',4':12,13]phenanthro[1',10',9',8':5,6,7,8]piceno[1,14-bcd]selenepine 17-oxide (27<sub>SeO</sub>):** To a solution of compound **19<sub>Se</sub>** (41 mg, 0.05 mmol, 1.0 equiv) in anhydrous dichloromethane (10 mL) in an oven-dried flask with a magnetic stirring bar was added 2KHSO<sub>5</sub>.KHSO<sub>4</sub>.K<sub>2</sub>SO<sub>4</sub> (Oxone, 307 mg, 0.5 mmol, 10.0 equiv). The mixture was stirred for 2 hours at room temperature. 10% aqueous sodium sulfite solution (1.4 mL, 1.0 mmol, 20 equiv) was added to quench the reaction and the mixture was concentrated under reduced pressure. The residue was purified by flash chromatography (silica, 30-50 % PE in EA, UV) to give the title compound **27<sub>SeO</sub>** (40 mg, 95%) as a yellow solid:  $^1\text{H}$  NMR (400 MHz,  $\text{CDCl}_3$ )  $\delta$  9.24 (s, 1H), 9.21 (s, 1H), 9.15 (s, 1H), 9.12 (s, 1H), 9.06 (s, 1H), 8.96 (s, 1H), 8.94 (d,  $J = 6.0$  Hz, 1H), 8.83 (s, 1H), 8.56 (d,  $J = 6.0$  Hz, 1H), 8.13 (d,  $J = 6.0$  Hz, 1H), 8.06 (d,  $J = 8.0$  Hz, 1H), 8.00 (t,  $J = 6.0$  Hz, 1H), 7.58 (t,  $J = 6.0$  Hz, 1H), 7.31 (d,  $J = 8.0$  Hz, 1H), 7.03 (t,  $J = 6.0$

Hz, 1H), 6.33 (d,  $J = 6.0$  Hz, 1H), 1.80 (s, 9H), 1.77 (s, 9H), 1.72 (s, 9H), 1.50 (s, 9H);  $^{13}\text{C}$  NMR (151 MHz,  $\text{CDCl}_3$ )  $\delta$  150.1, 149.9, 149.9, 149.8, 144.1, 143.4, 139.7, 133.6, 133.5, 131.7, 130.6, 130.6, 130.5, 130.4, 130.2, 130.2, 130.1, 129.7, 129.3, 129.2, 128.8, 128.2, 128.1, 126.9, 125.7, 125.6, 124.6, 123.6, 123.1, 122.8, 122.7, 122.3, 120.6, 120.5, 119.6, 119.4, 119.2, 119.2, 118.7, 35.7, 35.7, 35.7, 35.0, 31.9, 31.9, 31.8, 31.3; HRMS (ESI)  $m/z$ :  $[\text{M} + \text{H}]^+$  Calcd for  $\text{C}_{58}\text{H}_{53}\text{OSe}$  845.3256; found 845.3260.

**Scheme S4.** Attempts to synthesize tellurium-doped nanographene.

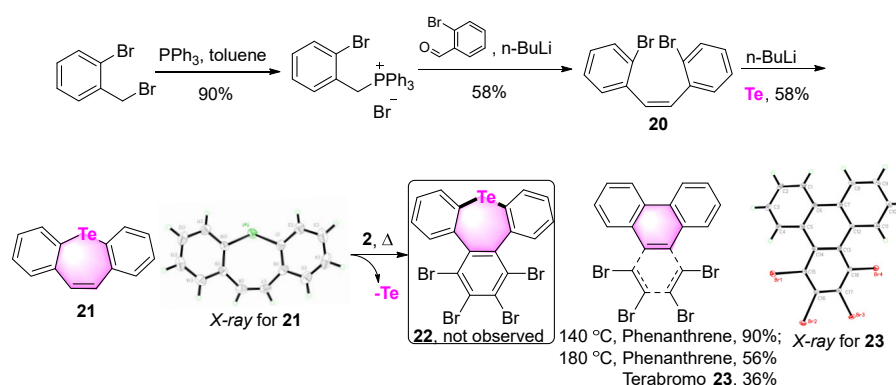

**(Z)-1,2-bis(2-bromophenyl)ethane (20):** To obtain compound **20**, we use the synthetic methodology as reported<sup>[S5]</sup>.

**Dibenzo[b,f]tellurepine (21):** . A solution of (Z)-1,2-bis(2-bromophenyl)ethene **20** (618 mg, 1.83 mmol, 1.0 equiv) in 9 mL of anhydrous THF was added dropwise to a solution of *n*-BuLi (4.58 mL of 1.6 M solution in pentane, 7.32 mmol, 4.0 equiv) in 9 mL of anhydrous THF at  $-78$  °C, and the mixture was stirred for 1 hour under argon at this temperature. Then tellurium (1.83 mmol, 328 mg, 1.0 equiv) was added as a suspension in THF under argon atmosphere, and the reaction mixture was warmed to room temperature. After the mixture was stirred at room temperature for 3 hours, the reaction mixture was quenched with aqueous  $\text{NH}_4\text{Cl}$  solution, and then extracted with EtOAc, dried over anhydrous  $\text{Na}_2\text{SO}_4$ . The organic phase was concentrated and purified by silica gel column chromatography (silica, PE, UV) to give the title product as a colorless solid (325 mg, 58%).  $^1\text{H}$  NMR (400 MHz,  $\text{CDCl}_3$ )  $\delta$  7.82 (d,  $J = 8.0$  Hz, 2H), 7.29–7.23 (m, 4H), 7.14 (t,  $J = 8.0$  Hz, 2H), 7.02 (s, 2H);  $^{13}\text{C}$  NMR (151 MHz,  $\text{CDCl}_3$ )  $\delta$  143.0, 138.6, 136.3, 129.1, 129.1, 128.4, 115.1; HRMS (ESI)  $m/z$ :  $[\text{M}=\text{O} + \text{H}]^+$  Calcd for  $\text{C}_{14}\text{H}_{11}\text{OTe}$  324.9867; found 324.9872.

**1,2,3,4-Tetrabromotriphenylene (23):** A mixture of dibenzo[b,f]tellurepine **21** (306 mg, 1.0 mmol, 1.0 equiv), tetrabromothiophene-S,S-dioxide **2**<sup>[S1]</sup> (647 mg, 1.5 mmol, 1.5 equiv) in *ortho*-dichlorobenzene (5 mL) in the sealed tube was heated to 140 or 180 °C around 12 hours. Then the mixture was cooled to room temperature and 2,3-dichloro-5,6-dicyano-1,4-benzoquinone (340 mg, 1.5 mmol, 1.5 equiv) was added, the mixture was heated to 90 °C and

stirred for around 30 minutes. The reaction mixture was concentrated under reduced pressure. The residue was purified by silica gel flash chromatography (PE) to give anthracene (99 mg, 56% for two steps) at 180 °C or give the title compound **23** (195 mg, 36% for two steps) as colorless solid:  $^1\text{H}$  NMR (400 MHz,  $\text{CDCl}_3$ )  $\delta$  9.00 (d,  $J = 8.0$  Hz, 2H), 8.41 (d,  $J = 8.0$  Hz, 2H), 7.65 (t,  $J = 8.0$  Hz, 2H), 7.54 (t,  $J = 8.0$  Hz, 2H);  $^{13}\text{C}$  NMR (101 MHz,  $\text{CDCl}_3$ )  $\delta$  134.3, 131.0, 129.1, 129.0, 128.8, 128.0, 126.12, 123.4, 119.9; HRMS (MALDI-TOF)  $m/z$ :  $[\text{M}+\text{H}]^+$  Calcd for  $\text{C}_{18}\text{H}_9\text{Br}_4$  540.7432 Found 540.7447.

**Scheme S5.** Synthesis of nanographene **29**<sub>Seco-HBC</sub> and **30**<sub>HBC</sub>.

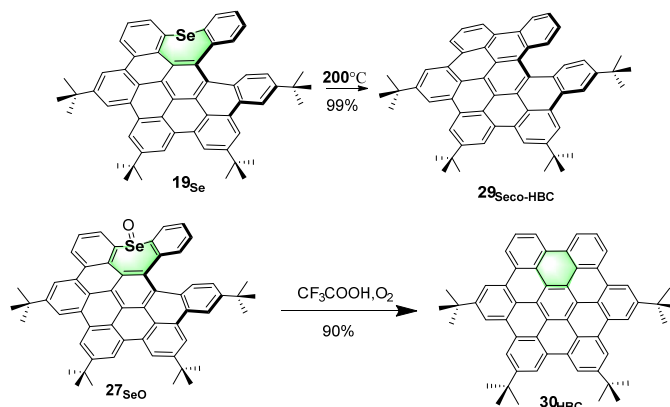

**2,5,8,19-tetra-tert-butyl**dibenzo[fg,ij]dibenzo[3,4:5,6]phenanthro[2,1,10,9,8,7-

**pqrstuv]pentaphene (**29**<sub>Seco-HBC</sub>): The powder of **19**<sub>Se</sub> (41 mg, 0.05 mmol, 1.0 equiv) in a tube was heated to 200 °C for 5 minutes. After the mixture was cooled to room temperature, dichloromethane was added to dissolve the product to check by TLC (PE: DCM = 5:1, UV), all the reactant was converted to the product. Remove the solvent under reduced pressure to give the compound **29**<sub>Seco-HBC</sub> (41 mg, 90%) as a yellow powder.  $^1\text{H}$  NMR (400 MHz,  $\text{CDCl}_3$ )  $\delta$  9.24 (s, 2H), 9.22 (s, 2H), 9.20 (s, 1H), 9.16 (d,  $J = 8.0$  Hz, 1H), 9.07 (s, 1H), 8.97 (d,  $J = 8.0$  Hz, 1H), 8.74 (s, 1H), 8.73 (d,  $J = 8.0$  Hz, 1H), 8.57 (d,  $J = 8.0$  Hz, 1H), 8.45 (d,  $J = 8.0$  Hz, 1H), 8.17 (t,  $J = 8.0$  Hz, 1H), 7.60 (t,  $J = 8.0$  Hz, 1H), 7.36 (d,  $J = 8.0$  Hz, 1H), 7.27 (t,  $J = 8.0$  Hz, 1H), 1.80 (s, 18H), 1.79 (s, 9H), 1.55 (s, 9H);  $^{13}\text{C}$  NMR (101 MHz,  $\text{CDCl}_3$ )  $\delta$  149.9, 149.4, 149.2, 131.9, 131.7, 131.4, 130.6, 130.5, 130.5, 130.5, 130.3, 130.2, 130.1, 130.1, 129.9, 129.2, 127.0, 126.6, 125.3, 125.1, 124.0, 123.5, 123.4, 123.1, 123.1, 123.0, 122.7, 122.6, 121.9, 121.2, 120.6, 120.5, 119.7, 119.3, 119.0, 119.0, 118.9, 118.8, 118.4, 35.8, 35.7, 35.7, 35.1, 32.0, 31.4; HRMS (MALDI-TOF)  $m/z$ :  $[\text{M}]^+$  Calcd for  $\text{C}_{58}\text{H}_{52}$  748.4069 Found 748.4090.**

**2,5,8,11-Tetra-tert-butyl**hexabenzo[bc,ef,hi,kl,no,qr]coronene (**30**<sub>HBC</sub>): To a solution of compound **27**<sub>SeO</sub> (42 mg, 0.05 mmol, 1.0 equiv) in dichloromethane (10 mL) in an oven-dried flask with a magnetic stirring bar was added  $\text{CF}_3\text{COOH}$  (5 ml). The mixture was roughly stirred in room temperature until no compound **27**<sub>SeO</sub> left (around 24 hours, checked by TLC, silica, PE: EtOAc = 1:1, UV). The mixture was washed with water, and the organic phase was dried over anhydrous  $\text{Na}_2\text{SO}_4$ . The organic phase was concentrated and purified by silica gel column chromatography (silica, 10-20 % PE in DCM, UV) to give the titled compound **30**<sub>HBC</sub> (33 mg,

90%) as yellow solid:  $^1\text{H}$  NMR (400 MHz,  $\text{CDCl}_3$ )  $\delta$  9.30 (s, 2H), 9.25 (s, 2H), 9.18 (s, 2H), 9.03 (s, 2H), 8.88 (d,  $J = 8.0$  Hz, 2H), 8.73 (d,  $J = 8.0$  Hz, 2H), 7.88 (t,  $J = 8.0$  Hz, 2H), 1.89 (s, 18H), 1.80 (s, 18H);  $^{13}\text{C}$  NMR (151 MHz,  $\text{CDCl}_3$ )  $\delta$  148.7, 148.5, 130.4, 130.3, 130.0, 130.0, 129.8, 129.8, 126.0, 124.9, 123.7, 123.3, 121.3, 121.3, 120.2, 120.2, 120.1, 118.8, 118.7, 118.7, 118.6, 35.7, 35.6, 32.1, 32.0. The NMR data were identical with the reported results.<sup>[S7]</sup>

**Scheme S6.** Attempts to Synthesize fully cyclized product **31<sub>s</sub>**.

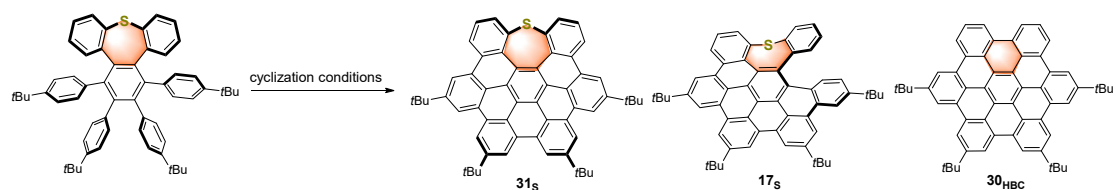

|   | Reagents                                                   | Solvents                      | Temp<br>(°C) | time     | Products (%)          |                       |                         |
|---|------------------------------------------------------------|-------------------------------|--------------|----------|-----------------------|-----------------------|-------------------------|
|   |                                                            |                               |              |          | <b>31<sub>s</sub></b> | <b>17<sub>s</sub></b> | <b>30<sub>HBC</sub></b> |
| 1 | DDQ (10.0 eq), $\text{CF}_3\text{SO}_3\text{H}$ (13.0 eq.) | DCM                           | 0            | 2 mins   | 0                     | 80                    | 0                       |
| 2 | DDQ (10.0 eq), $\text{CF}_3\text{SO}_3\text{H}$ (13.0 eq.) | DCM                           | 0            | 10 mins  | 0                     | 61                    | 16                      |
| 3 | DDQ (10.0 eq), $\text{CF}_3\text{SO}_3\text{H}$ (13.0 eq.) | DCM                           | 30           | 10 mins  | 0                     | 40                    | 15                      |
| 4 | DDQ (10.0 eq), $\text{CF}_3\text{SO}_3\text{H}$ (30.0 eq.) | DCM                           | 30           | 10 mins  | 0                     | 26                    | 8                       |
| 5 | $\text{FeCl}_3$ (20)                                       | $\text{CH}_3\text{NO}_2$ -DCM | 0            | 3 hours  | 0                     | 42                    | 0                       |
| 6 | $\text{FeCl}_3$ (20)                                       | $\text{CH}_3\text{NO}_2$ -DCM | 30           | 3 hours  | 0                     | 50                    | 0                       |
| 7 | $\text{FeCl}_3$ (20)                                       | $\text{CH}_3\text{NO}_2$ -DCM | 30           | 18 hours | 0                     | 82                    | trace                   |
| 8 | $\text{Cu}(\text{OAc})_2$                                  | THF                           | 30           | 18 hours | 0                     | 0                     | 0                       |
| 9 | $\text{Cu}(\text{OTf})_2$                                  | THF                           | 30           | 18 hours | 0                     | 0                     | 0                       |

a)

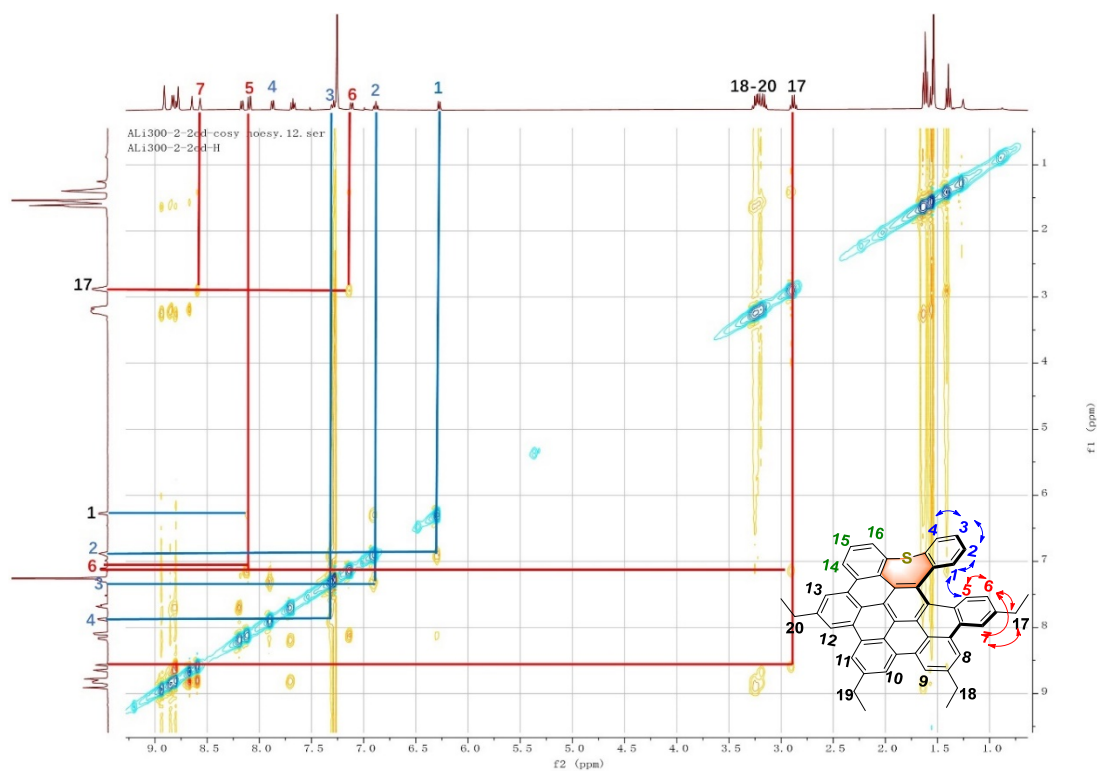

b)

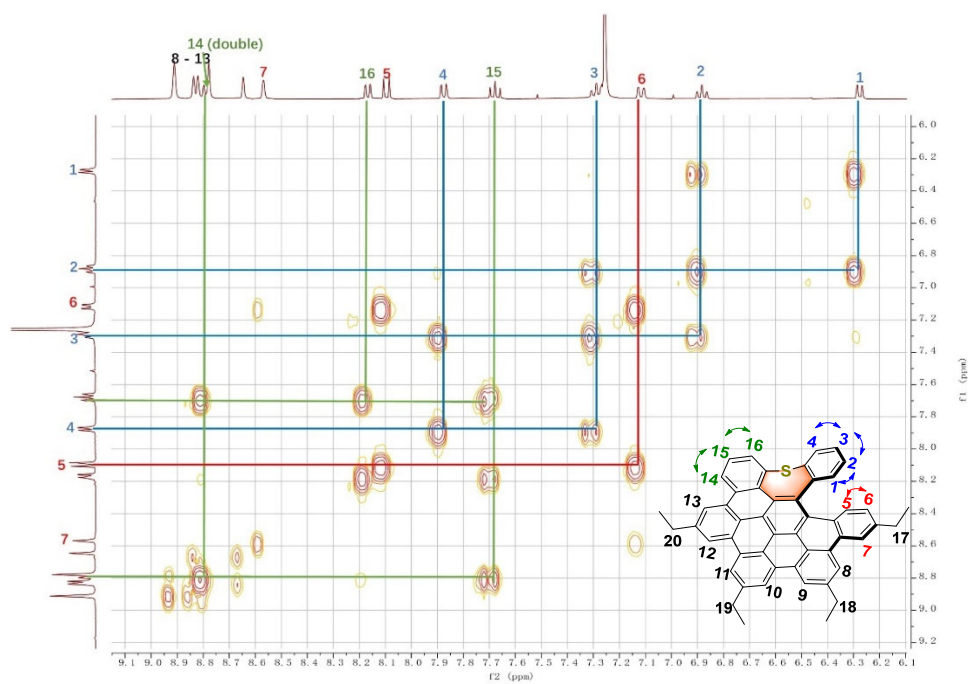

**Figure S1.** (a) 2D ROESY spectrum of compound **16<sub>s</sub>** with structure depiction of representative NOEs by arrows. Compared to 18–20, only protons of methylene **17** shows the NOEs with one singlet peak (proton **7**) and one doublet peak (proton **6**). (b) 2D H-H COSY spectrum of compound **16<sub>s</sub>** with different spin systems of protons.

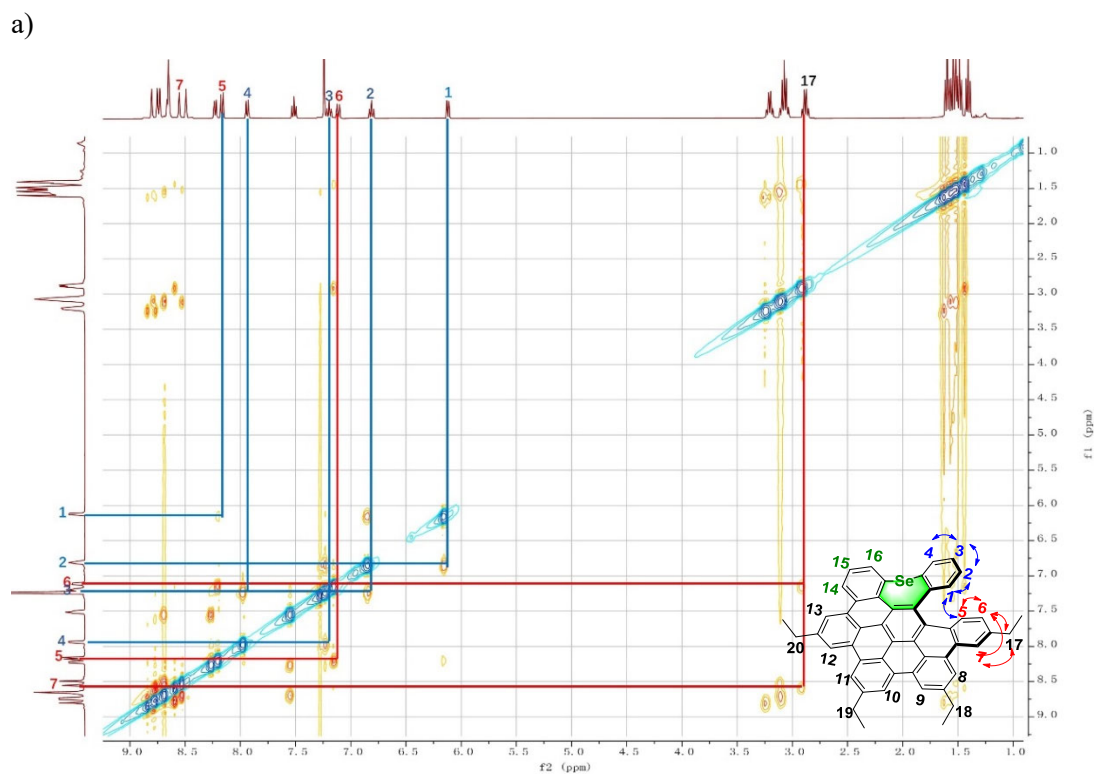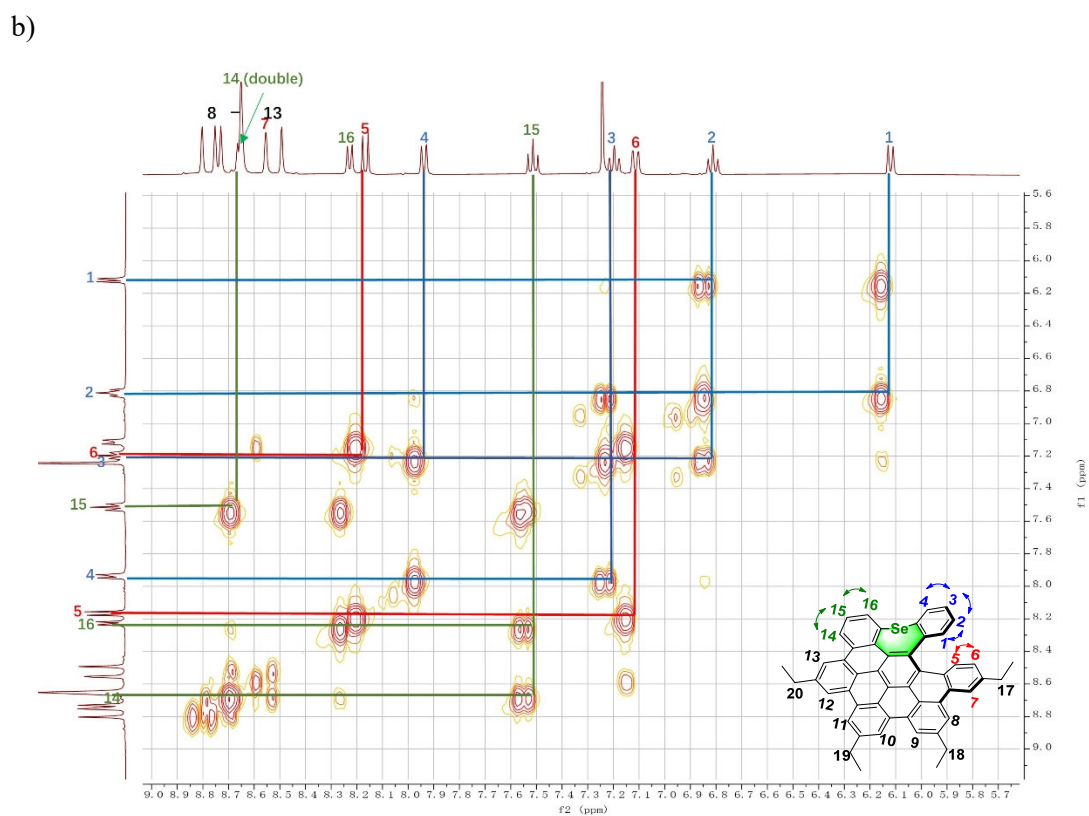

**Figure S2.** (a) 2D ROESY spectrum of compound  $18_{Se}$  with structure depiction of representative NOEs by arrows. Compared to 18–20, only protons of methylene 17 shows the NOEs with one singlet peak (proton 7) and one doublet peak (proton 6). (b) 2D H-H COSY spectrum of compound  $18_{Se}$  with different spin systems of protons.



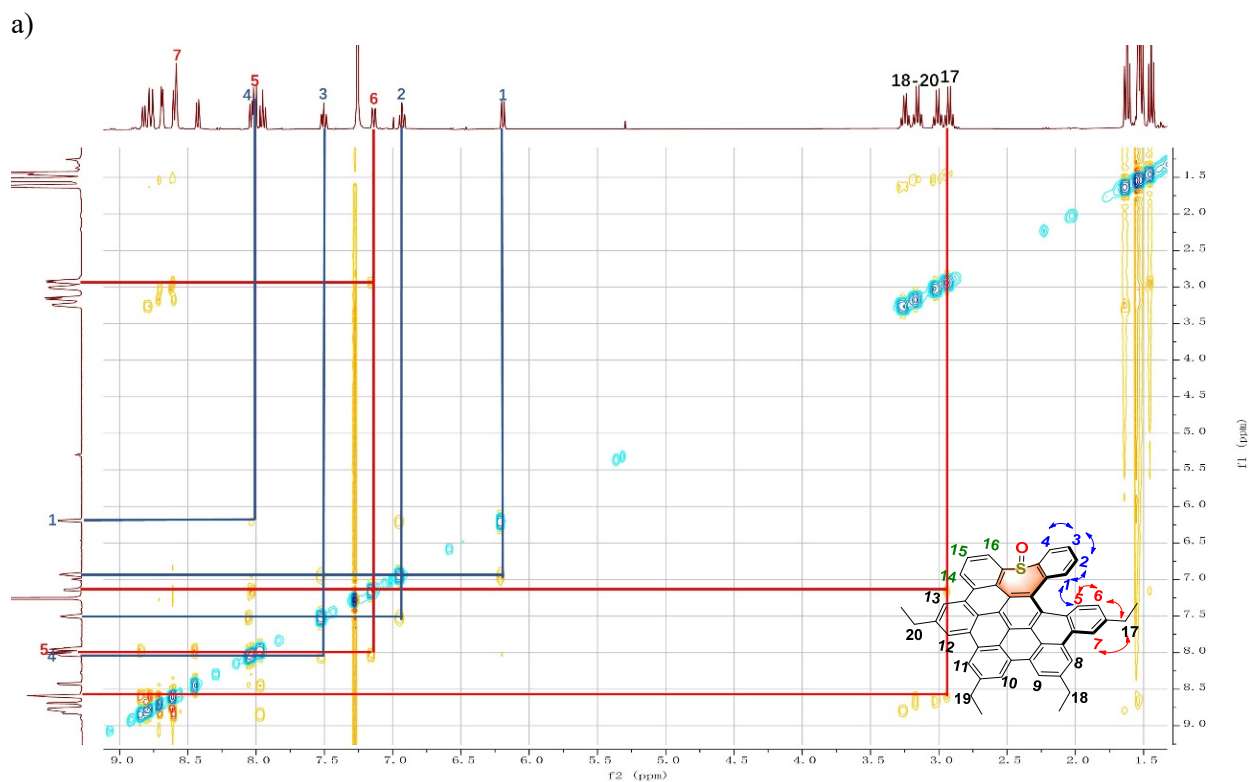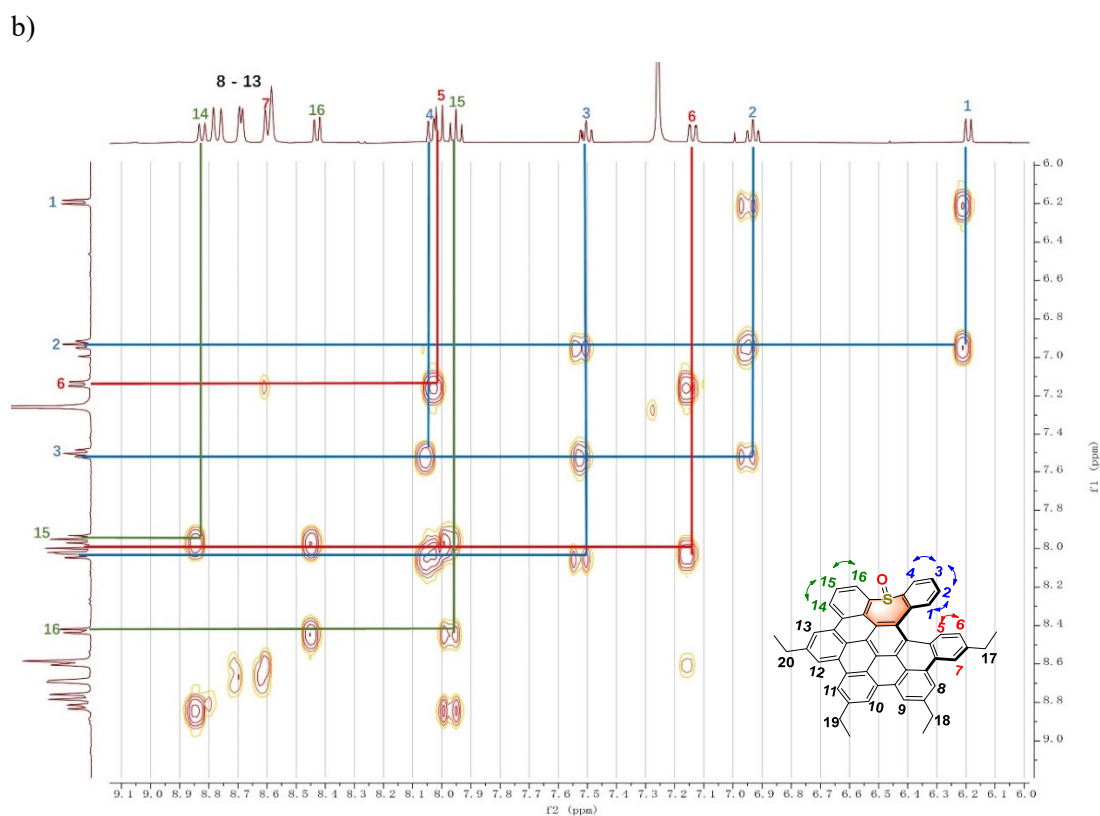

**Figure S3.** (a) 2D ROESY spectrum of compound **24<sub>sO</sub>** with structure depiction of representative NOEs by arrows. Compared to 18–20, only protons of methylene **17** shows the NOEs with one singlet peak (proton **7**) and one doublet peak (proton **6**). (b) 2D H-H COSY spectrum of compound **24<sub>sO</sub>** with different spin systems of protons.

**Table S1.** Details of the Crystal Structure Analyses of Compounds **5<sub>o</sub>**, **17<sub>s</sub>** and **18<sub>se</sub>**.

|                                            | <b>5<sub>o</sub></b>              | <b>17<sub>s</sub></b>             | <b>18<sub>se</sub></b>             |
|--------------------------------------------|-----------------------------------|-----------------------------------|------------------------------------|
| CCDC No.                                   | 2238626                           | 2238630                           | 2238631                            |
| empirical formula                          | C <sub>50</sub> H <sub>34</sub> O | C <sub>58</sub> H <sub>52</sub> S | C <sub>50</sub> H <sub>36</sub> Se |
| formula wt                                 | 650.77                            | 781.05                            | 715.75                             |
| crystal description                        | yellow block                      | yellow block                      | yellow block                       |
| crystal system                             | Monoclinic                        | Monoclinic                        | Monoclinic                         |
| space group                                | C2                                | P 1 21/n 1                        | P 1 21/c 1                         |
| T (K)                                      | 296(2)                            | 100.00                            | 150.00                             |
| <i>a</i> (Å)                               | 30.193(3)                         | 20.8041(6)                        | 13.038(4)                          |
| <i>b</i> (Å)                               | 5.0770(4)                         | 7.5111(2)                         | 12.335(3)                          |
| <i>c</i> (Å)                               | 22.061(2)                         | 27.2964(7) A                      | 21.069(6)                          |
| <i>α</i> (°)                               | 90                                | 90                                | 90                                 |
| <i>β</i> (°)                               | 109.639(4)                        | 90.9110(10)                       | 102.674(12)                        |
| <i>γ</i> (°)                               | 90                                | 90                                | 90                                 |
| <i>V</i> (Å <sup>3</sup> )                 | 3185.0(5)                         | 4264.8(2)                         | 3305.7(17)                         |
| <i>Z</i>                                   | 4                                 | 4                                 | 4                                  |
| $\rho_{\text{calcd}}$ (mg/m <sup>3</sup> ) | 1.357                             | 1.216                             | 1.438                              |
| $\mu$ (mm <sup>-1</sup> )                  | 0.079                             | 0.958                             | 1.175                              |
| $\theta$ range (°)                         | 2.699–25.144                      | 2.691–68.401                      | 1.925–25.150                       |
| <i>F</i> (000)                             | 1368                              | 1664                              | 1480                               |
| collected reflens no.                      | 9766                              | 34271                             | 37341                              |
| unique reflens no.                         | 5091                              | 7760                              | 5927                               |
| <i>R</i> [ <i>I</i> > 2σ( <i>I</i> )]      | 0.0677                            | 0.0414                            | 0.0560                             |
| <i>R</i> (ref)                             | 0.1325                            | 0.0480                            | 0.0720                             |
| <i>wR</i> 2 [ <i>I</i> > 2σ( <i>I</i> )]   | 0.1465                            | 0.1115                            | 0.1629                             |
| <i>wR</i> 2 (ref)                          | 0.1921                            | 0.1164                            | 0.1758                             |

**Table S2.** Details of the Crystal Structure Analyses of Compounds **21**, **23**, **24S<sub>O</sub>** and **30<sub>HBC</sub>**.

|                                            | <b>21</b>                          | <b>23</b>                                      | <b>24S<sub>O</sub></b>                              | <b>30<sub>HBC</sub></b>                             |
|--------------------------------------------|------------------------------------|------------------------------------------------|-----------------------------------------------------|-----------------------------------------------------|
| CCDC No.                                   | 2238627                            | 2238628                                        | 2238629                                             | 2238632                                             |
| empirical formula                          | C <sub>14</sub> H <sub>10</sub> Te | C <sub>18</sub> H <sub>8</sub> Br <sub>4</sub> | C <sub>51</sub> H <sub>38</sub> C <sub>12</sub> O S | C <sub>116</sub> H <sub>100</sub> S <sub>0.28</sub> |
| formula wt                                 | 305.82                             | 543.88                                         | 769.77                                              | 1503.01                                             |
| crystal description                        | Colorless<br>block                 | Colorless block                                | Yellow block                                        | Yellow block                                        |
| crystal system                             | Orthorhombic                       | Triclinic                                      | Monoclinic                                          | Monoclinic                                          |
| space group                                | Pca2(1)                            | P-1                                            | P 1 21 1                                            | P 1 21/c 1                                          |
| T (K)                                      | 298(2)                             | 150.00                                         | 150.00                                              | 100.00                                              |
| <i>a</i> (Å)                               | 11.7118(7)                         | 7.7791(14)                                     | 9.2713(2)                                           | 14.5888(8)                                          |
| <i>b</i> (Å)                               | 12.2711(6)                         | 9.3866(15)                                     | 28.4806(6)                                          | 39.4014(19)                                         |
| <i>c</i> (Å)                               | 7.8403(4)                          | 11.1959(19)                                    | 13.7600(3)                                          | 15.8848(8)                                          |
| <i>α</i> (°)                               | 90                                 | 105.367(6)                                     | 90                                                  | 90                                                  |
| <i>β</i> (°)                               | 90                                 | 93.035(7)                                      | 93.2120(10)                                         | 96.813(3)                                           |
| <i>γ</i> (°)                               | 90                                 | 99.210(7)                                      | 90                                                  | 90                                                  |
| <i>V</i> (Å <sup>3</sup> )                 | 1126.78(10)                        | 774.2(2)                                       | 3627.65(14)                                         | 9066.4(8)                                           |
| <i>Z</i>                                   | 4                                  | 2                                              | 4                                                   | 4                                                   |
| $\rho_{\text{calcd}}$ (mg/m <sup>3</sup> ) | 1.803                              | 2.333                                          | 1.409                                               | 1.101                                               |
| $\mu$ (mm <sup>-1</sup> )                  | 2.601                              | 10.388                                         | 0.279                                               | 0.525                                               |
| $\theta$ range (°)                         | 2.404–28.341                       | 2.288–28.285                                   | 2.060–24.999                                        | 3.018–65.366                                        |
| <i>F</i> (000)                             | 584                                | 512                                            | 1608                                                | 3202                                                |
| collected reflens no.                      | 14089                              | 23328                                          | 22808                                               | 91185                                               |
| unique reflens no.                         | 2803                               | 3828                                           | 12164                                               | 15463                                               |
| <i>R</i> [ <i>I</i> > 2σ( <i>I</i> )]      | 0.0295                             | 0.0313                                         | 0.0792                                              | 0.1343                                              |
| <i>R</i> (ref)                             | 0.0480                             | 0.0417                                         | 0.1323                                              | 0.1655                                              |
| <i>wR2</i> [ <i>I</i> > 2σ( <i>I</i> )]    | 0.0636                             | 0.0698                                         | 0.1952                                              | 0.3653                                              |
| <i>wR2</i> (ref)                           | 0.0743                             | 0.0742                                         | 0.2349                                              | 0.3877                                              |

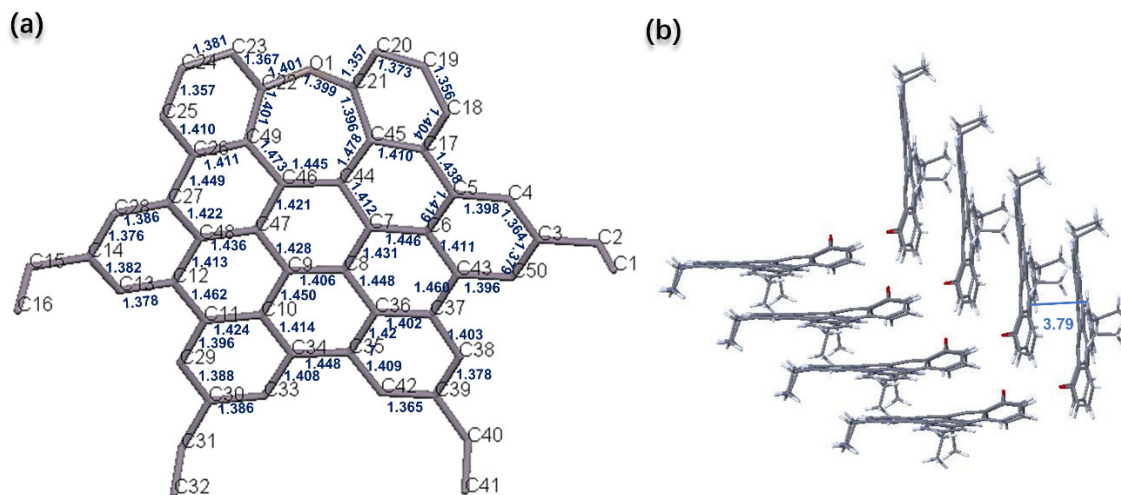

**Figure S4.** Single crystals suitable for X-ray diffraction analysis were obtained from solutions of **5o** in dichloromethane and hexane at room temperature. (a) Crystal structure of compound **5o** with atom labels and bond lengths [Å], and (b) molecular packing of compound **5o** labeled with  $\pi$ - $\pi$  stacking distance.

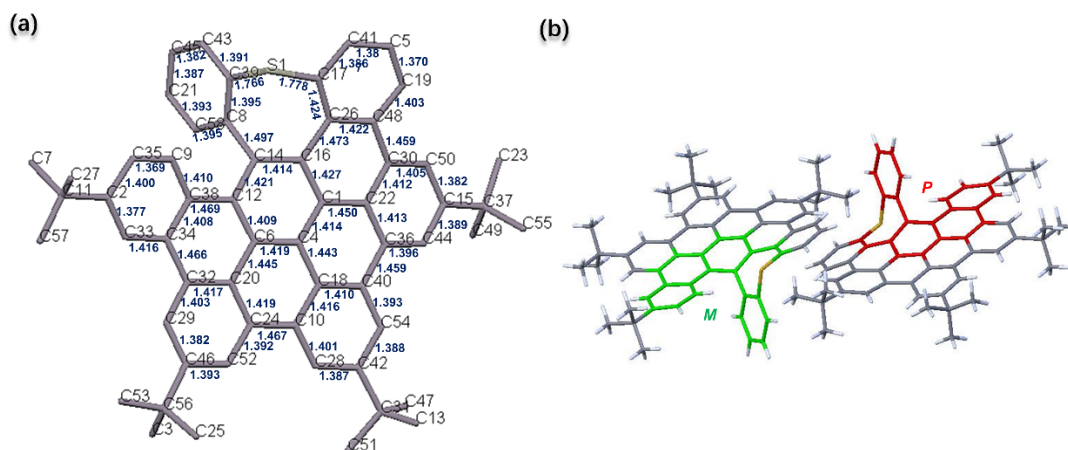

**Figure S5.** Single crystals suitable for X-ray diffraction analysis were obtained from solutions of **17s** in dichloromethane and hexane at room temperature. (a) Crystal structure of compound **17s** with atom labels and bond lengths [Å], and (b) molecular packing of compound **17s**. The *P/M* enantiomers were identified.

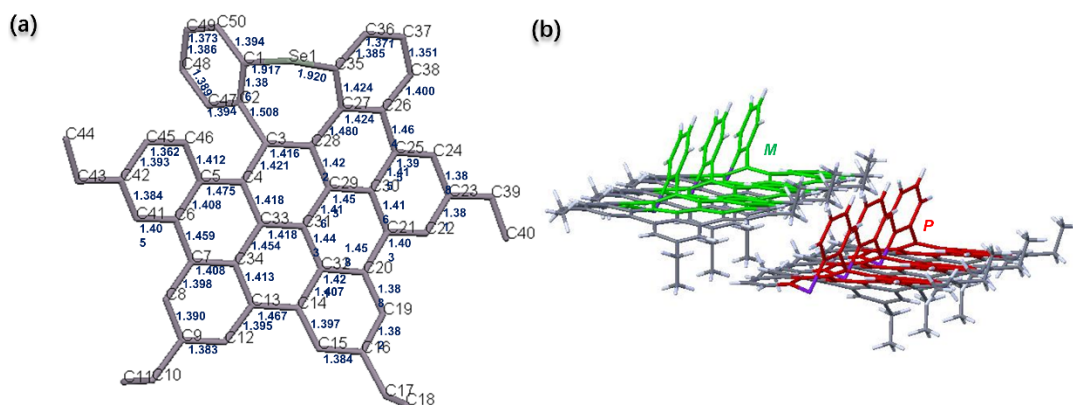

**Figure S6.** Single crystals suitable for X-ray diffraction analysis were obtained from solutions of **18<sub>se</sub>** in dichloromethane and hexane at room temperature. (a) Crystal structure of compound **18<sub>se</sub>** with atom labels and bond lengths [Å], and (b) molecular packing of compound **18<sub>se</sub>**. The *P/M* enantiomers were identified.

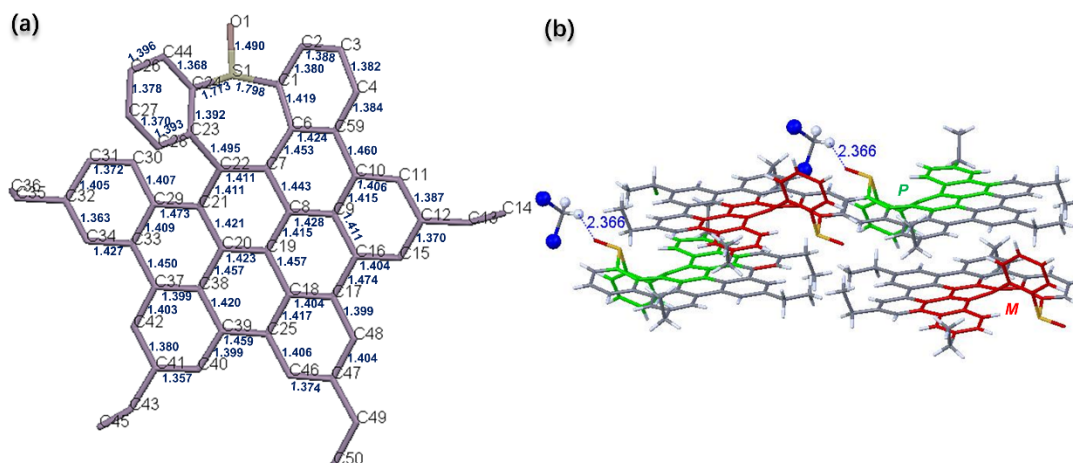

**Figure S7.** Single crystals suitable for X-ray diffraction analysis were obtained from solutions of **24<sub>so</sub>** in dichloromethane and hexane at room temperature. (a) Crystal structure of compound **24<sub>so</sub>** with atom labels and bond lengths [Å], and (b) molecular packing of compound **24<sub>so</sub>**. The *P/M* enantiomers were identified. The hydrogen bond between the oxide and dichloromethane was shown.

**Table S3.** Photophysical Properties of different NGs.

|                              | $\lambda_{\text{max}}$ (nm) <sup>a</sup> | $\epsilon_{\text{max}}$ (M <sup>-1</sup> cm <sup>-1</sup> ) | $\lambda_{\text{em}}$ (nm) <sup>b</sup> | Stokes shift (cm <sup>-1</sup> ) | $\Phi_{\text{F}}$ <sup>c</sup> |
|------------------------------|------------------------------------------|-------------------------------------------------------------|-----------------------------------------|----------------------------------|--------------------------------|
| <b>5<sub>O</sub></b>         | 351                                      | $3.3 \times 10^5$                                           | 486/459                                 | 7913/6704                        | 0.05                           |
| <b>16<sub>S</sub></b>        | 351                                      | $1.8 \times 10^5$                                           | 477                                     | 7526                             | 0.12                           |
| <b>17<sub>S</sub></b>        | 351                                      | $1.3 \times 10^5$                                           | 475                                     | 7437                             | 0.18                           |
| <b>18<sub>Se</sub></b>       | 351                                      | $2.3 \times 10^5$                                           | 477                                     | 7526                             | 0.0096                         |
| <b>19<sub>Se</sub></b>       | 351                                      | $1.8 \times 10^5$                                           | 476                                     | 7482                             | 0.0097                         |
| <b>24<sub>SO</sub></b>       | 353                                      | $2.3 \times 10^5$                                           | 475                                     | 7276                             | 0.20                           |
| <b>25<sub>SO</sub></b>       | 353                                      | $1.4 \times 10^5$                                           | 473                                     | 7187                             | 0.30                           |
| <b>26<sub>SeO</sub></b>      | 353                                      | $2.4 \times 10^5$                                           | 477                                     | 7364                             | 0.05                           |
| <b>27<sub>SeO</sub></b>      | 353                                      | $1.0 \times 10^5$                                           | 476                                     | 7320                             | 0.12                           |
| <b>28<sub>SO2</sub></b>      | 360                                      | $1.1 \times 10^5$                                           | 489                                     | 7328                             | 0.19                           |
| <b>29<sub>Seco-HBC</sub></b> | 359                                      | $1.1 \times 10^5$                                           | 497/474                                 | 7734/6758                        | 0.20                           |
| <b>30<sub>HBC</sub></b>      | 358                                      | $2.4 \times 10^5$                                           | 494                                     | 7690                             | 0.04                           |

<sup>a</sup> Measured in dichloromethane (5  $\mu\text{M}$ ). <sup>b</sup>  $\lambda_{\text{ex}}$  = 350 nm. <sup>c</sup> Quinine sulfate ( $\Phi_{\text{F}}$  = 0.54 in 0.1 M H<sub>2</sub>SO<sub>4</sub>) as a reference.

a)

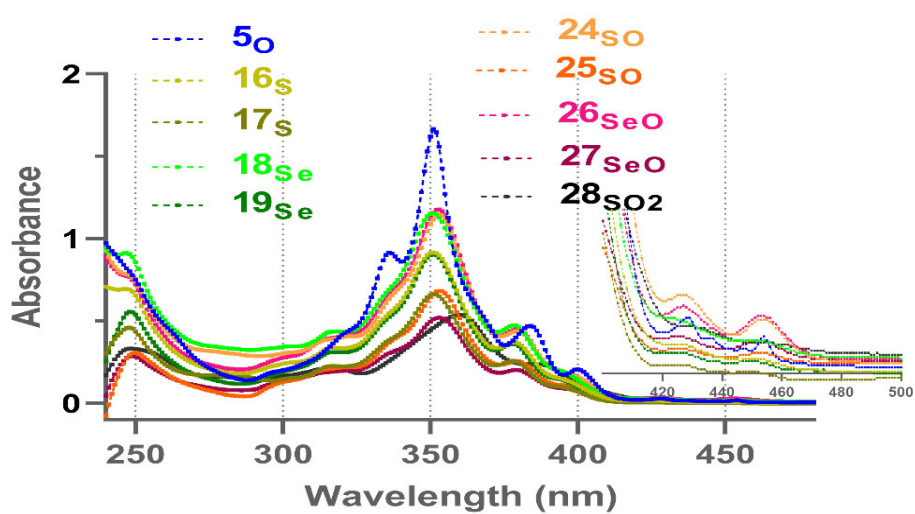

b)

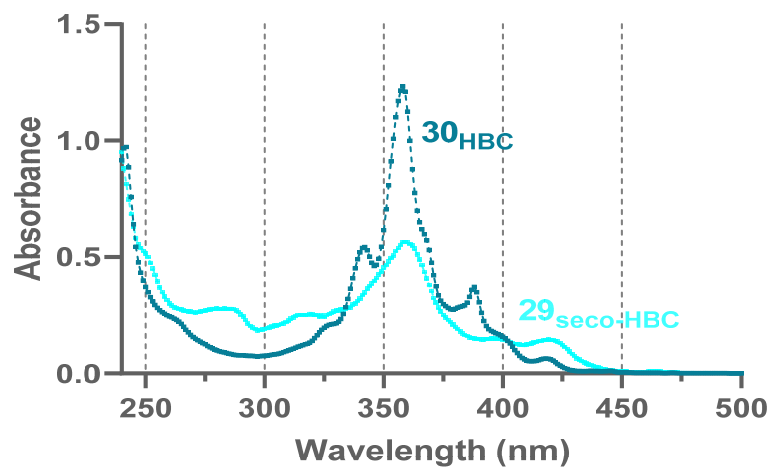

**Figure S8.** a) UV-vis spectra of compound 5<sub>O</sub>, 16<sub>S</sub>, 17<sub>S</sub>, 18<sub>Se</sub>, 19<sub>Se</sub>, 24<sub>SO</sub>, 25<sub>SO</sub>, 26<sub>SeO</sub>, 27<sub>SeO</sub>, and 28<sub>SO<sub>2</sub></sub> (5  $\mu$ M in DCM); b) UV-vis spectra of compounds 29<sub>Seco-HBC</sub> and 30<sub>HBC</sub> (5  $\mu$ M in DCM).

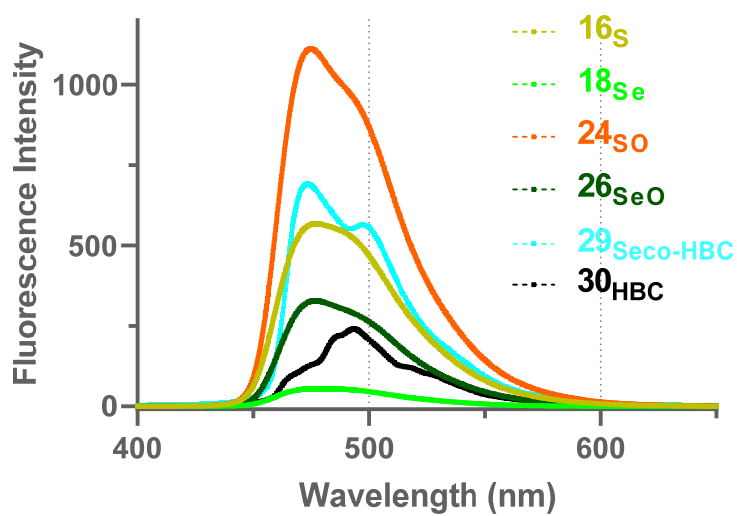

**Figure S9.** Fluorescent spectrum of compound 16<sub>S</sub>, 18<sub>Se</sub>, 24<sub>SO</sub>, 26<sub>SeO</sub>, 29<sub>Seco-HBC</sub>, and 30<sub>HBC</sub> (5  $\mu$ M in DCM).

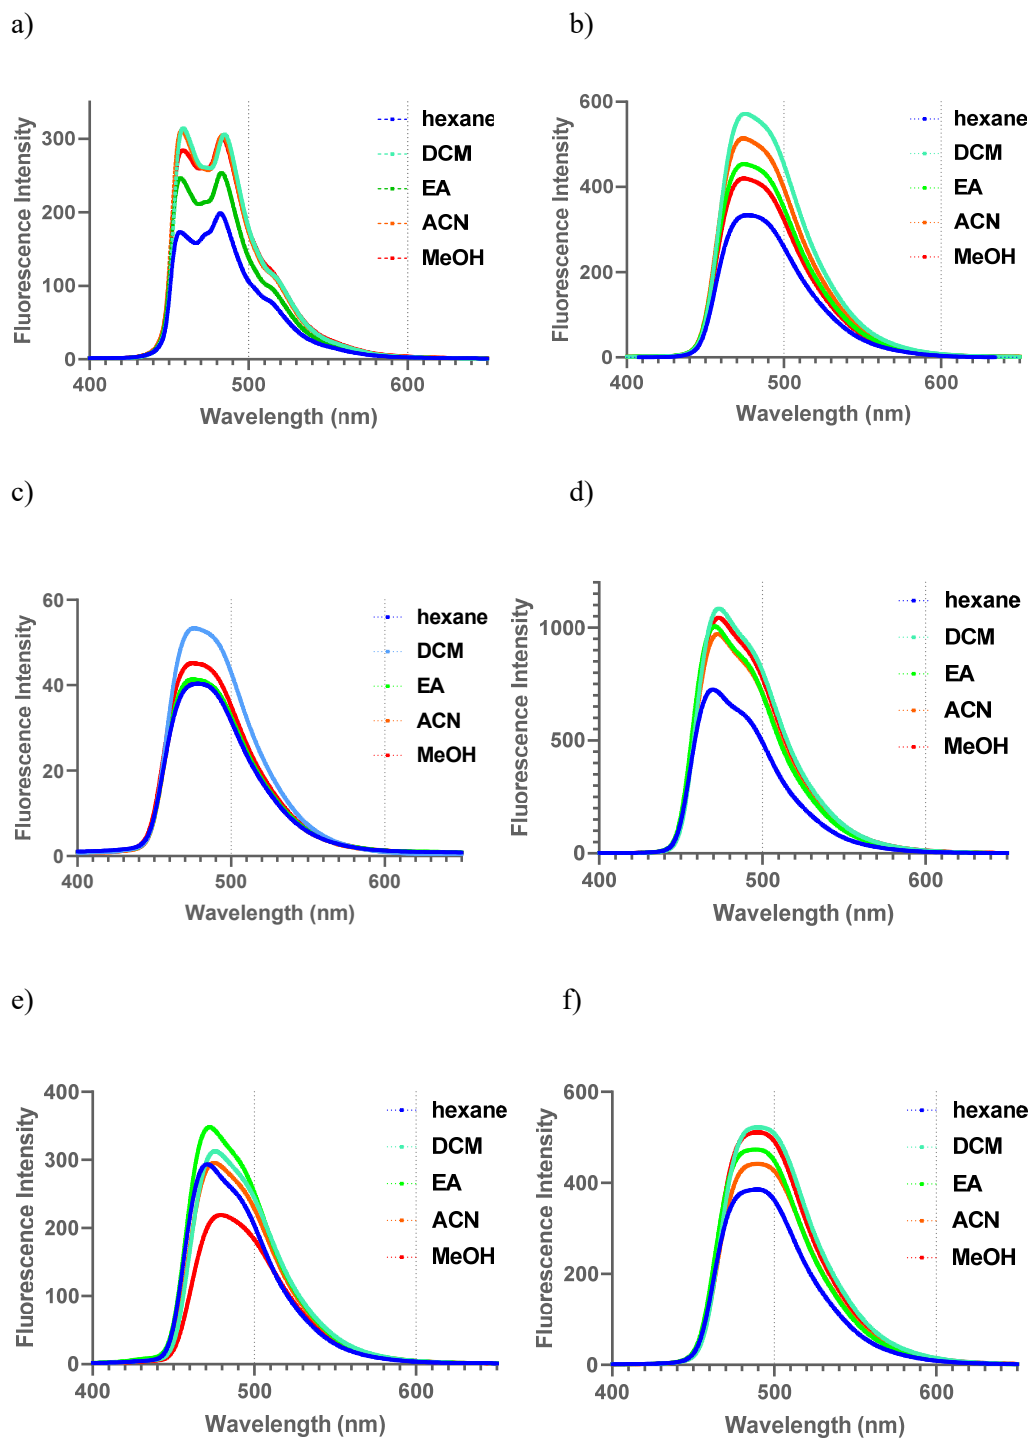

**Figure S10.** Fluorescence intensity of compounds **5<sub>O</sub>** (a), **17<sub>S</sub>** (b), **19<sub>Se</sub>** (c), **25<sub>SO</sub>** (d), **27<sub>SeO</sub>** (e), **28<sub>SO2</sub>** (f) at 5 μM concentration in different solvents.



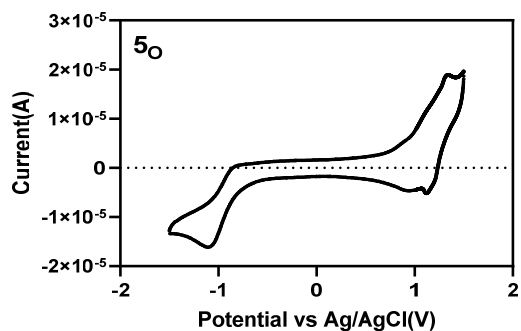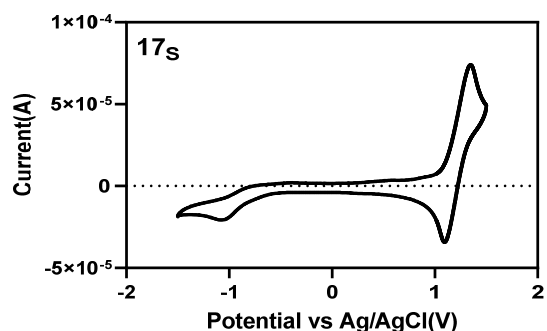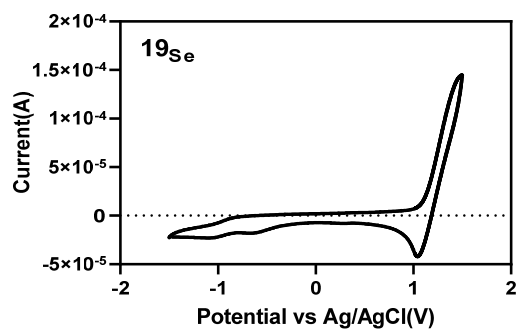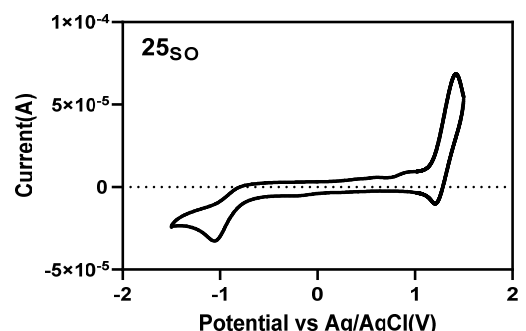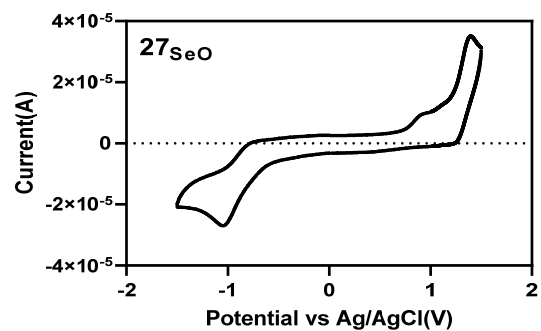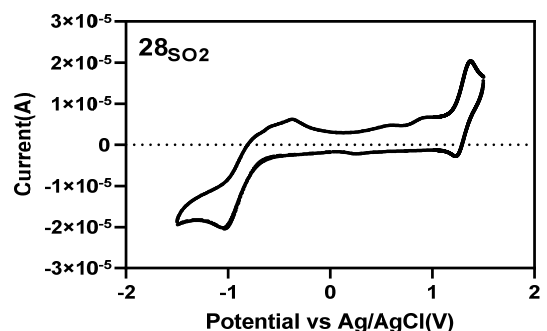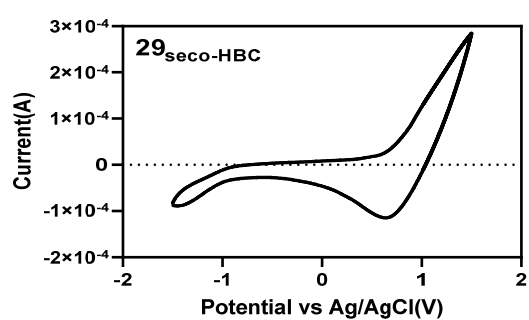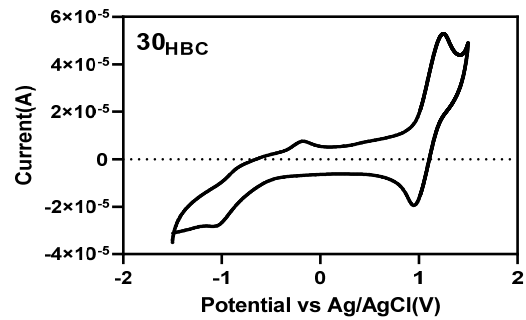

|                 | <b>5<sub>O</sub></b> | <b>17<sub>S</sub></b> | <b>19<sub>Se</sub></b> | <b>25<sub>SO</sub></b> | <b>27<sub>SeO</sub></b> | <b>28<sub>SO2</sub></b> | <b>29<sub>seco-HBC</sub></b> | <b>30<sub>HBC</sub></b> |
|-----------------|----------------------|-----------------------|------------------------|------------------------|-------------------------|-------------------------|------------------------------|-------------------------|
| Ep <sub>c</sub> | 1.32 V;              | 1.36 V;               | -0.84 V                | 1.40 V;                | 1.38 V;                 | 1.36 V;                 |                              | 1.23 V;                 |
|                 | -0.88 V              | -0.78 V               |                        | 0.92 V;                | 0.92 V;                 | 0.91 V;                 |                              | -0.22 V                 |
|                 |                      |                       |                        | -0.82 V                | -0.81 V                 | 0.56 V;                 |                              |                         |
|                 |                      |                       |                        |                        |                         | -0.40 V                 |                              |                         |
| Ep <sub>a</sub> | 1.13 V;              | 1.08 V;               | 1.059 V;               | 1.22 V;                | 1.23 V;                 | 1.24 V;                 | 0.59 V                       | 0.92 V;                 |
|                 | -1.12V               | -1.08 V               | -0.62 V;               | -1.08 V                | -1.03 V                 | -1.04 V                 |                              | -1.05 V                 |
|                 |                      |                       | -1.05 V                |                        |                         |                         |                              |                         |

**Figure S11** Cyclic Voltammetry of **5<sub>O</sub>**, **17<sub>S</sub>**, **19<sub>Se</sub>**, **25<sub>SO</sub>**, **27<sub>SeO</sub>**, **28<sub>SO2</sub>**, **29<sub>seco-HBC</sub>** and **30<sub>HBC</sub>** (Scan rate: 250 mV s<sup>-1</sup>, supporting electrolyte: 0.1 M nBu<sub>4</sub>NPF<sub>6</sub> in DCM) with summarized oxidation/reduction waves.

(a)

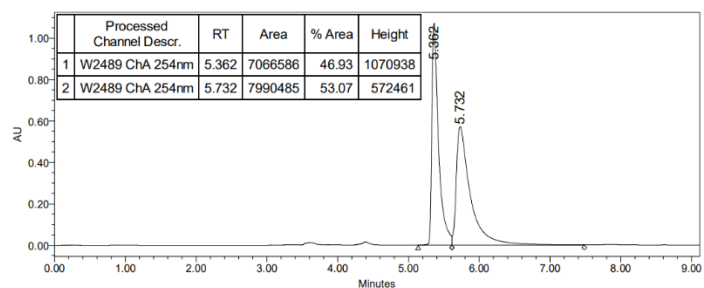

(b)

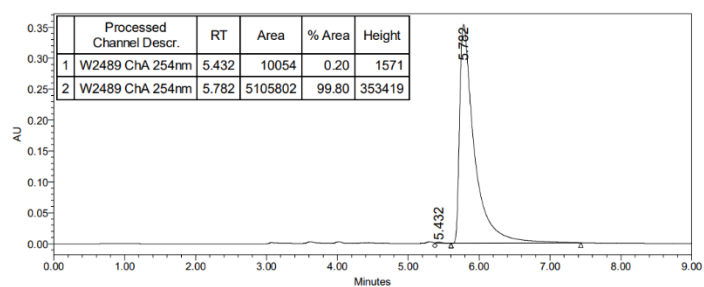

(c)

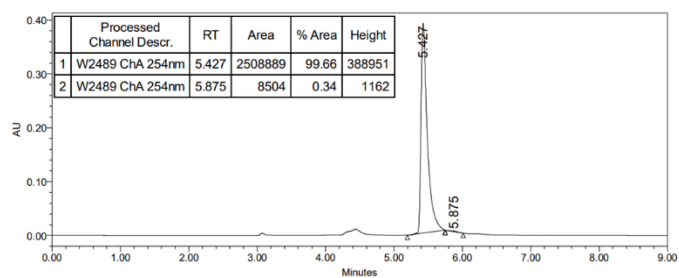

**Figure S12.** Racemic mixtures of **17s** were separated by preparative chiral HPLC and the purities were tested by analytic chiral HPLC (analytic IE-3 column, n-hexane/isopropanol = 98:2, v/v; 1.0 mL/min; 254 nm); a) Chromatography of racemic sample; b) Chromatography of enantiopure compound **17s-P**; c) Chromatography of enantiopure compound **17s-M**.

(a)

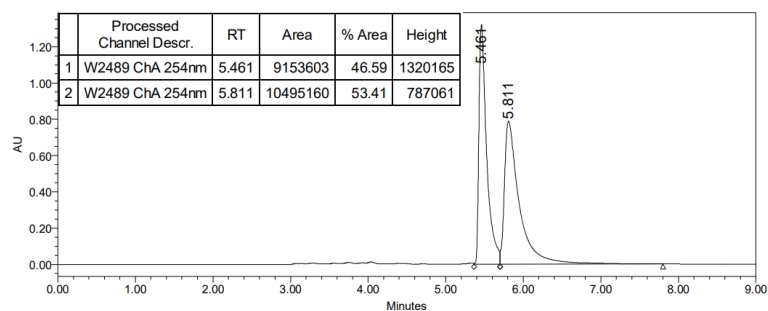

(b)

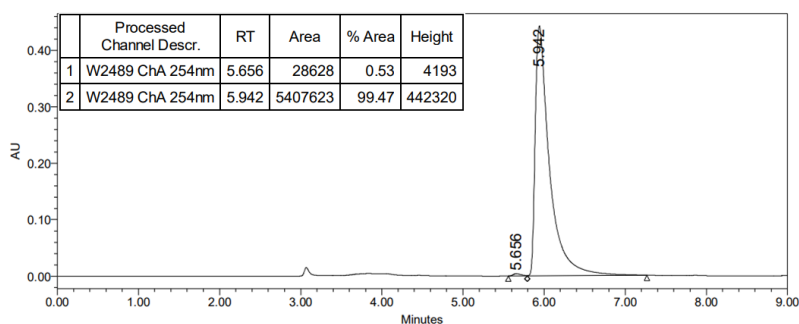

(c)

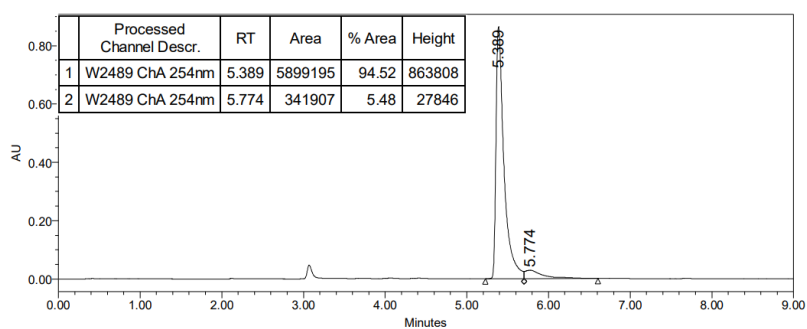

**Figure S13.** Racemic mixtures of **19<sub>Se</sub>** were separated by preparative chiral HPLC and the purities were tested by analytic chiral HPLC (analytic IE-3 column, n-hexane/isopropanol = 98:2, v/v; 1.0 mL/min; 254 nm); a) Chromatography of racemic sample; b) Chromatography of enantiopure compound **19<sub>Se</sub>-P**; c) Chromatography of enantiopure compound **19<sub>Se</sub>-M**.

(a)

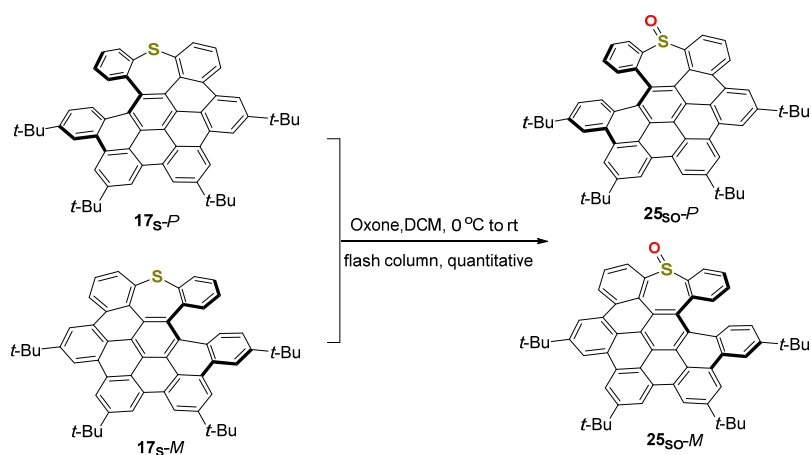

(b)

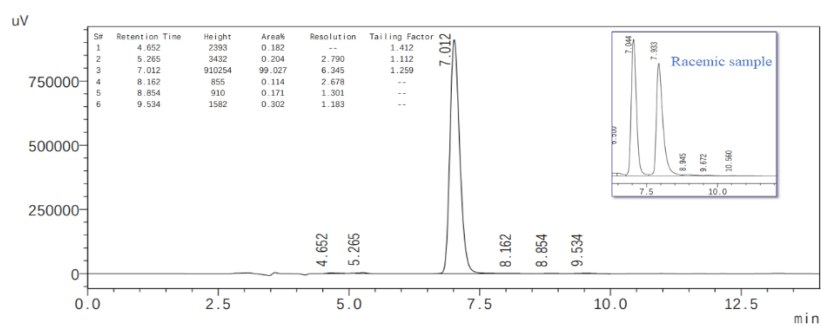

(c)

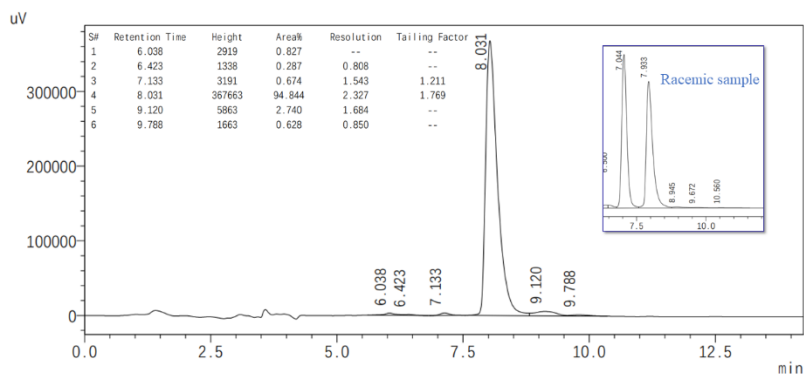

**Figure S14.** Preparation of optical pure enantiomers **25<sub>SO-P</sub>** and **25<sub>SO-M</sub>**. (a) Enantiomers **25<sub>SO-P</sub>** and **25<sub>SO-M</sub>** were obtained by following the synthetic procedure as racemic **25<sub>SO</sub>** in scheme S2 using optical pure compounds **17<sub>s-P</sub>** and **17<sub>s-M</sub>**. (b) Chiral chromatography of enantiopure compound **25<sub>SO-P</sub>**; (c) Chromatography of enantiopure compound **25<sub>SO-M</sub>**. (Unichiral CND-5H column, 95%*n*-Hexane/5%Ethanol, 1mL/min, 254 nm);

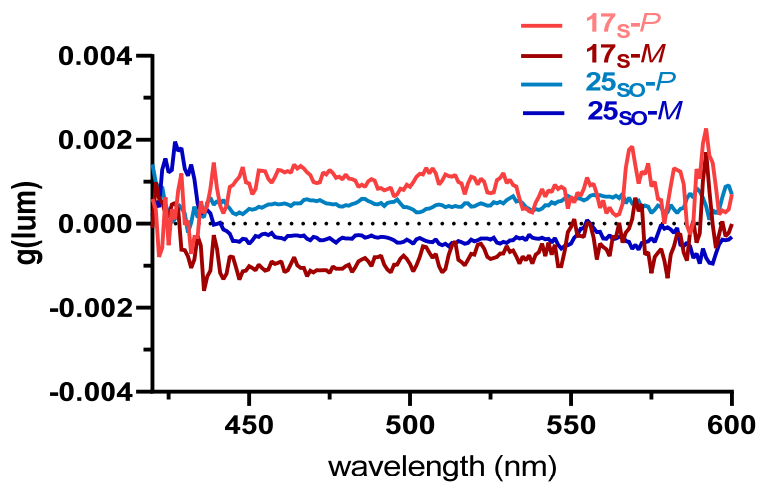

**Figure S15.** CPL dissymmetry factor  $g(\text{lum})$  versus wavelength spectra of  $17_s\text{-P}/17_s\text{-M}$ , and  $25_{so}\text{-P}/25_{so}\text{-M}$  in dichloromethane..

## Thermal enantiomerization of 17<sub>S</sub>-P.

(a)

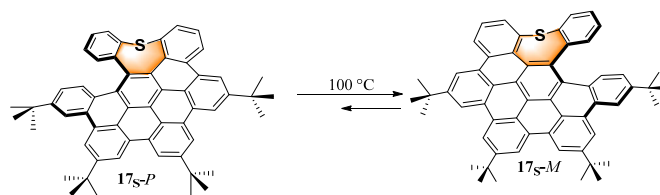

(b)

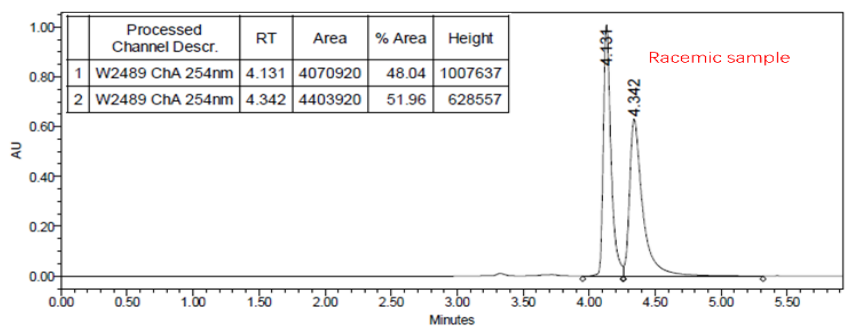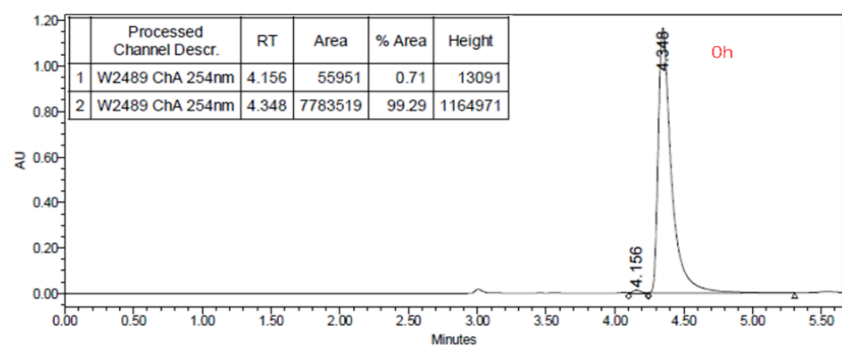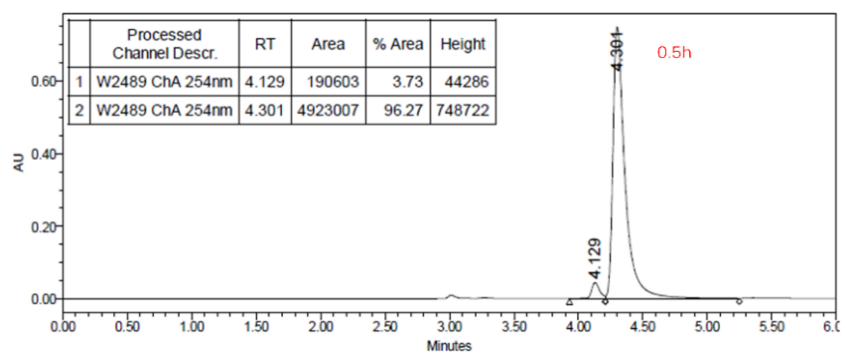

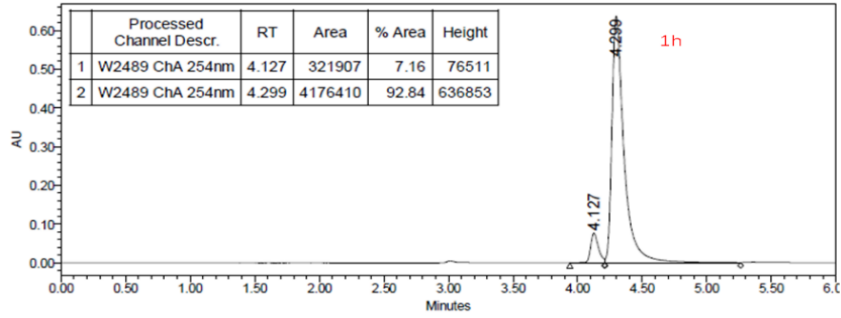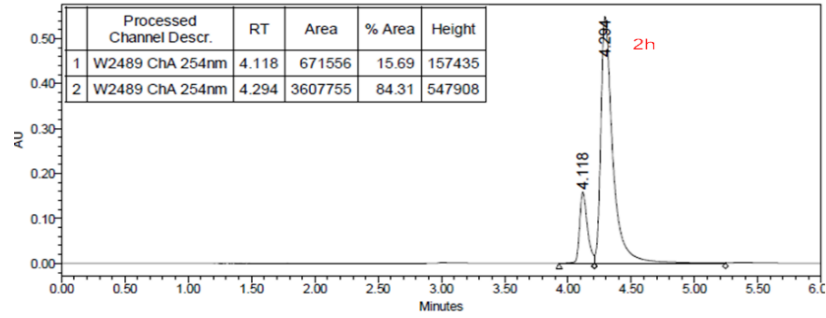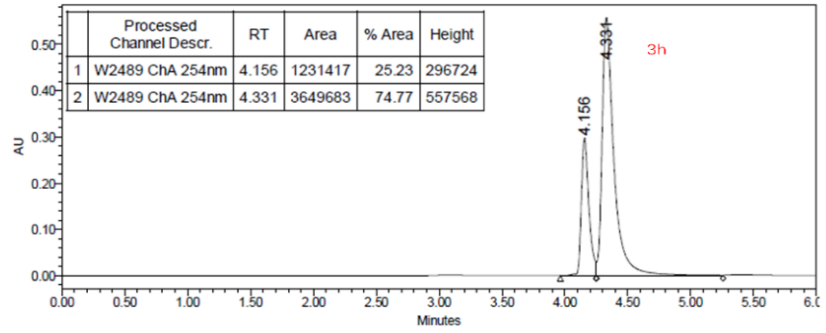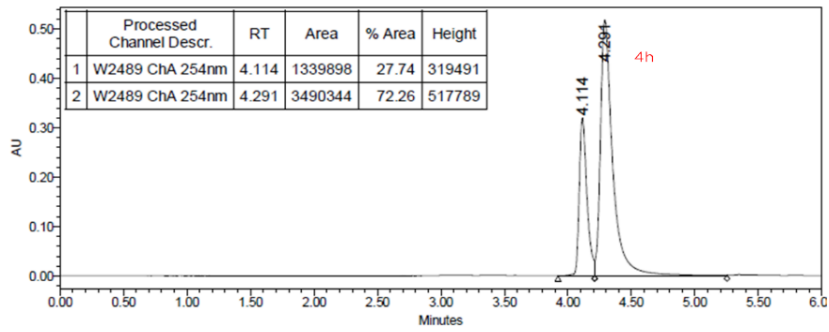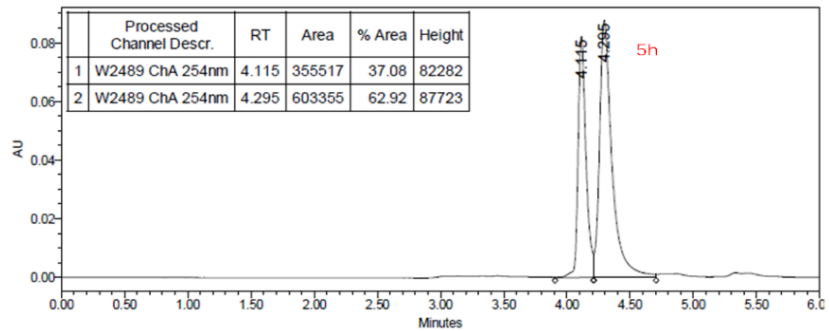



(c)

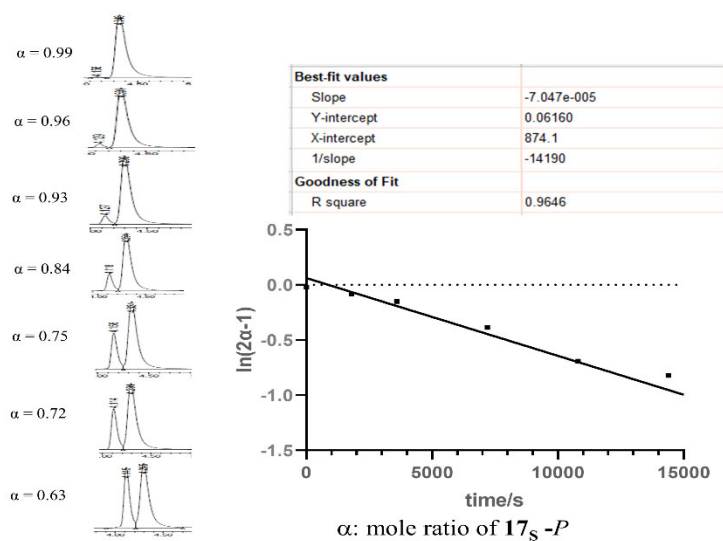

**Figure S16.** Thermal enantiomerization of **17<sub>s</sub>-P** at 100 °C followed by chiral HPLC analyses. (a) Scheme for thermal enantiomerization of **17<sub>s</sub>-P**. (b) Chiral HPLC traces with analytic IE-3 column after specific reaction time at 100 °C in 1,2-dichlorobenzene. The solvent was removed under reduced pressure before analyzing with eluent: n-hexane/isopropanol = 98:2, v/v; flow rate: 1.0 mL/min; detected by absorption at 254 nm. (c) The plot of HPLC-based conversion ratio of **17<sub>s</sub>-P** ( $\alpha$ ) at time  $t$ . It switches between the *P* and *M* enantiomers following a reversible first-order reaction<sup>[S6]</sup>, with a rate constant ( $k$ ), which could be obtained by fitting the experimental data using the following equation:  $\ln(2\alpha - 1) = -2kt$  and  $k$  was determined as  $3.52 \cdot 10^{-5} \text{ s}^{-1}$ . Then the enantiomerization barrier ( $\Delta G^\ddagger$ ) was calculated from the Eyring equation:  $k = \kappa k_B T h K^\ddagger$  and  $\Delta G^\ddagger = -RT \ln K^\ddagger$ .  $K^\ddagger$  is the thermodynamic equilibrium constant. The Gibbs activation energy can be determined as  $\Delta G^\ddagger(T) = -RT \ln(kh/\kappa k_B T)$ .  $R$  is the gas constant ( $R = 8.314 \text{ J K}^{-1}$ );  $h$  is the Planck constant ( $h = 6.626 \times 10^{-34} \text{ J s}$ );  $k_B$  is the Boltzmann constant ( $k_B = 1.38 \times 10^{-23} \text{ J K}^{-1}$ );  $\kappa$  is the transmission coefficient ( $\kappa = 1$ ). As a result, the enantiomerization energy was determined as  $\Delta G^\ddagger = 123845.82 \text{ J/mol} = 29.59 \text{ kcal/mol}$ .  $t_{1/2} = \ln 2/k = 19691.7 \text{ s} = 5.5 \text{ h}$ .

## Thermal enantiomerization of $19_{Se-P}$ .

(a)

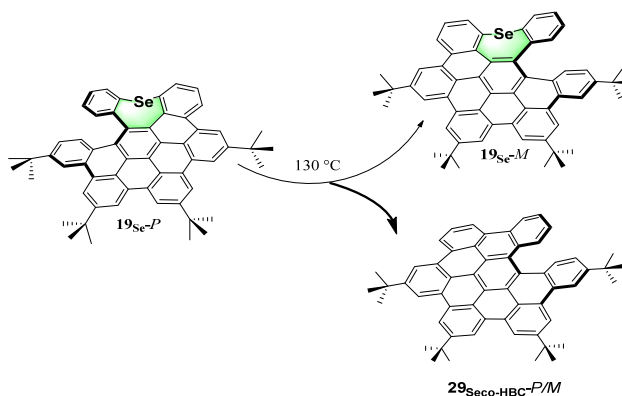

(b)

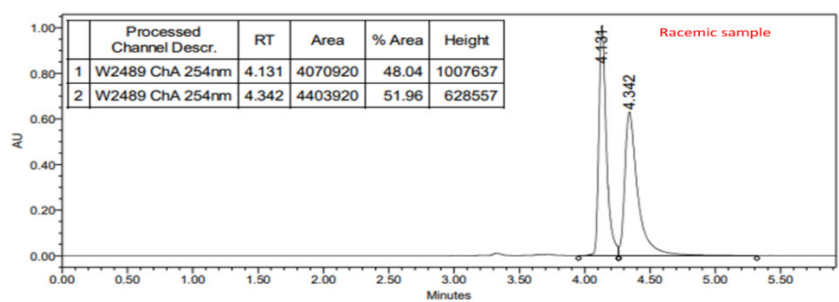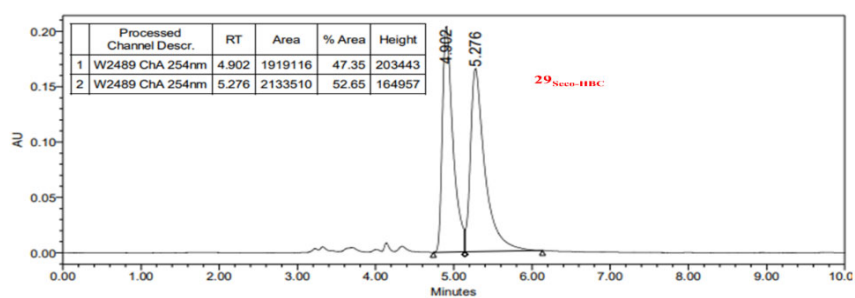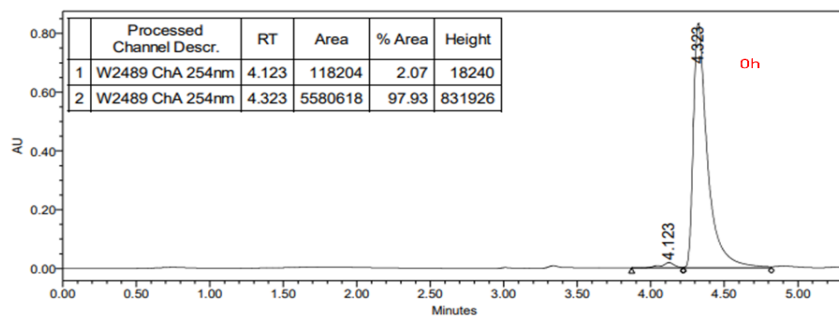

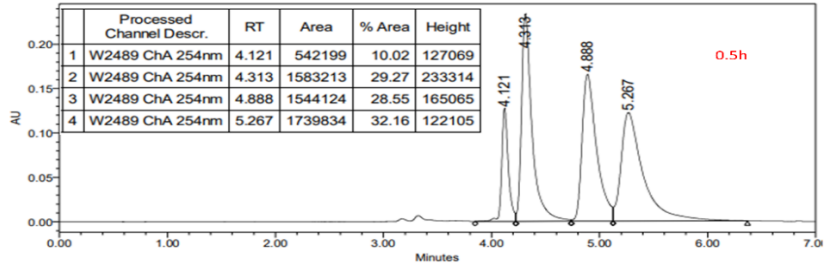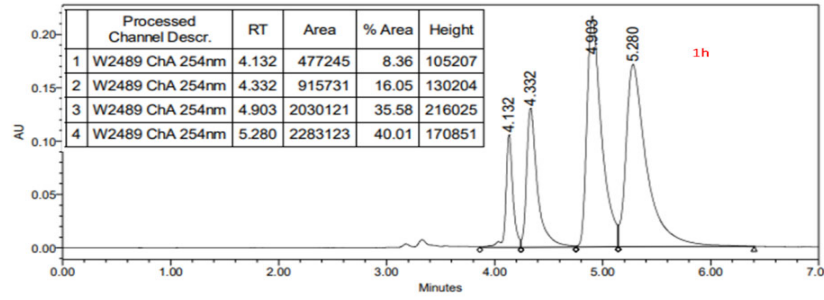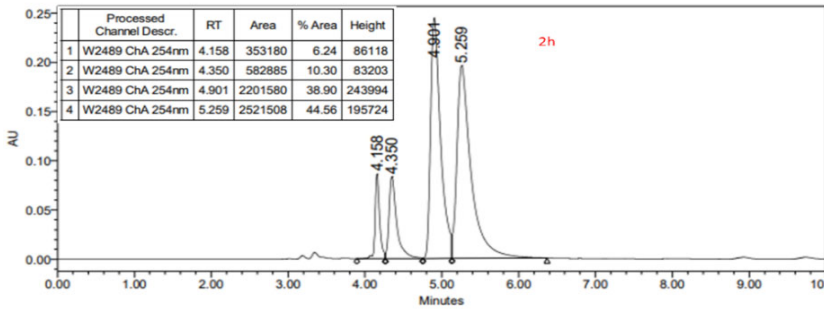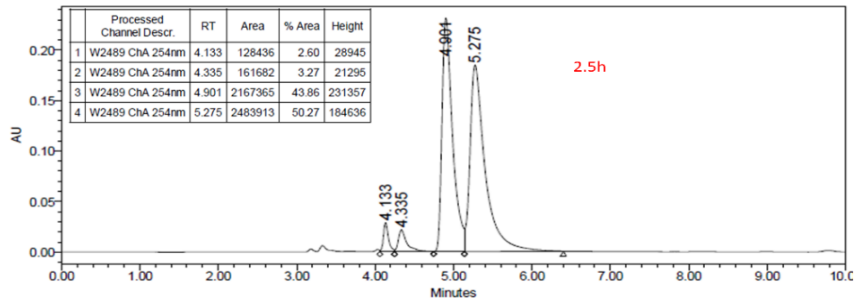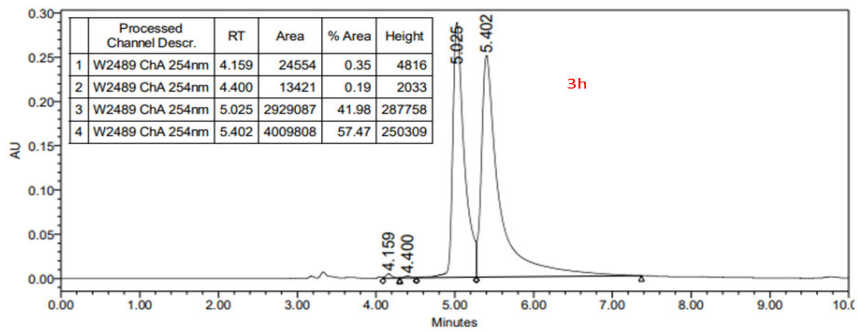

(c)

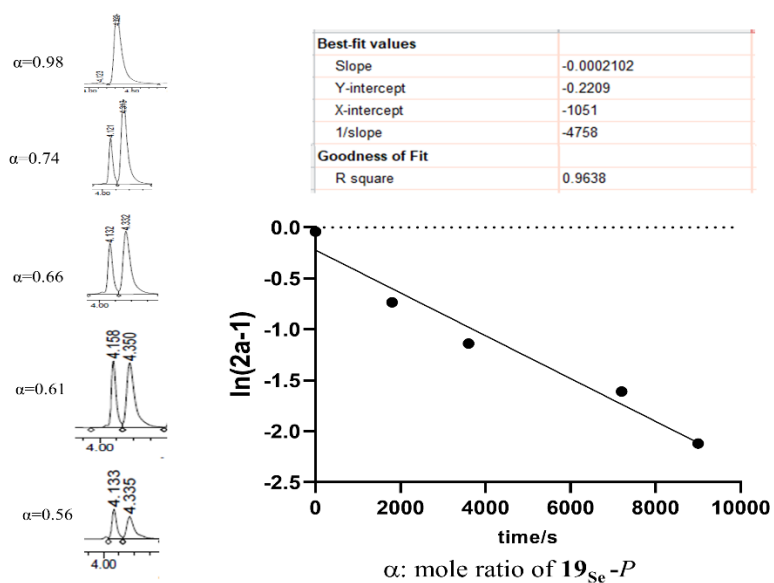

**Figure S17.** Thermal enantiomerization of  $19_{Se}-P$  at 130 °C followed by chiral HPLC. (a) Scheme for thermal enantiomerization of  $19_{Se}-P$  and selenium-extrusion of  $19_{Se}$  (b) Chiral HPLC trace for conversion, after specific reaction time at 130 °C in 1,2-dichlorobenzene. The solvent was removed under reduced pressure before analyzing with analytic IE-3 column, eluent: *n*-hexane/isopropanol = 98:2, v/v; flow rate: 1.0 mL/min; detected by absorption at 254 nm. Selenium-extrusion of  $19_{Se}-P$  occurs prior to enantiomerization of it at 130°C according to the HPLC spectra; (c) The plot of HPLC-based conversion ratio of  $19_{Se}-P$  ( $\alpha$ ) at time *t* (remove the data of 3h). It switches between the - (*P*) and - (*M*) form isomers following a reversible first-order reaction<sup>[S6]</sup>, with a rate constant (*k*), which could be obtained by fitting the experimental data using the following equation:  $\ln(2\alpha - 1) = -2kt$  and *k* was determined as  $1.05 \cdot 10^{-4} \text{ s}^{-1}$ . Then use the same calculation as  $17_S-P$  above, the enantiomerization energy of  $19_{Se}-P$  was determined as  $\Delta G^\ddagger = 130451.63 \text{ J/mol} = 31.16 \text{ kcal/mol}$ .  $t_{1/2} = \ln 2/k = 6601 \text{ s} = 1.83 \text{ h}$ .

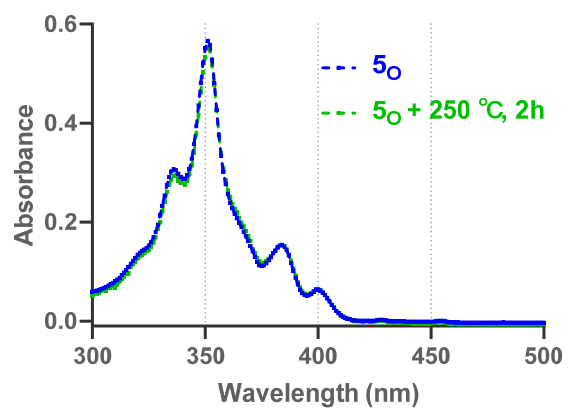

**Figure S18.** Changes in the UV/vis absorption spectra of **5O** upon heating. Heating was performed in the solid state and monitored by dissolving in DCM at 5  $\mu$ M concentration.

(a)

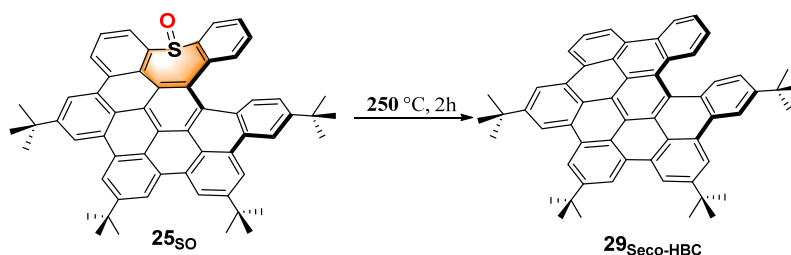

(b)

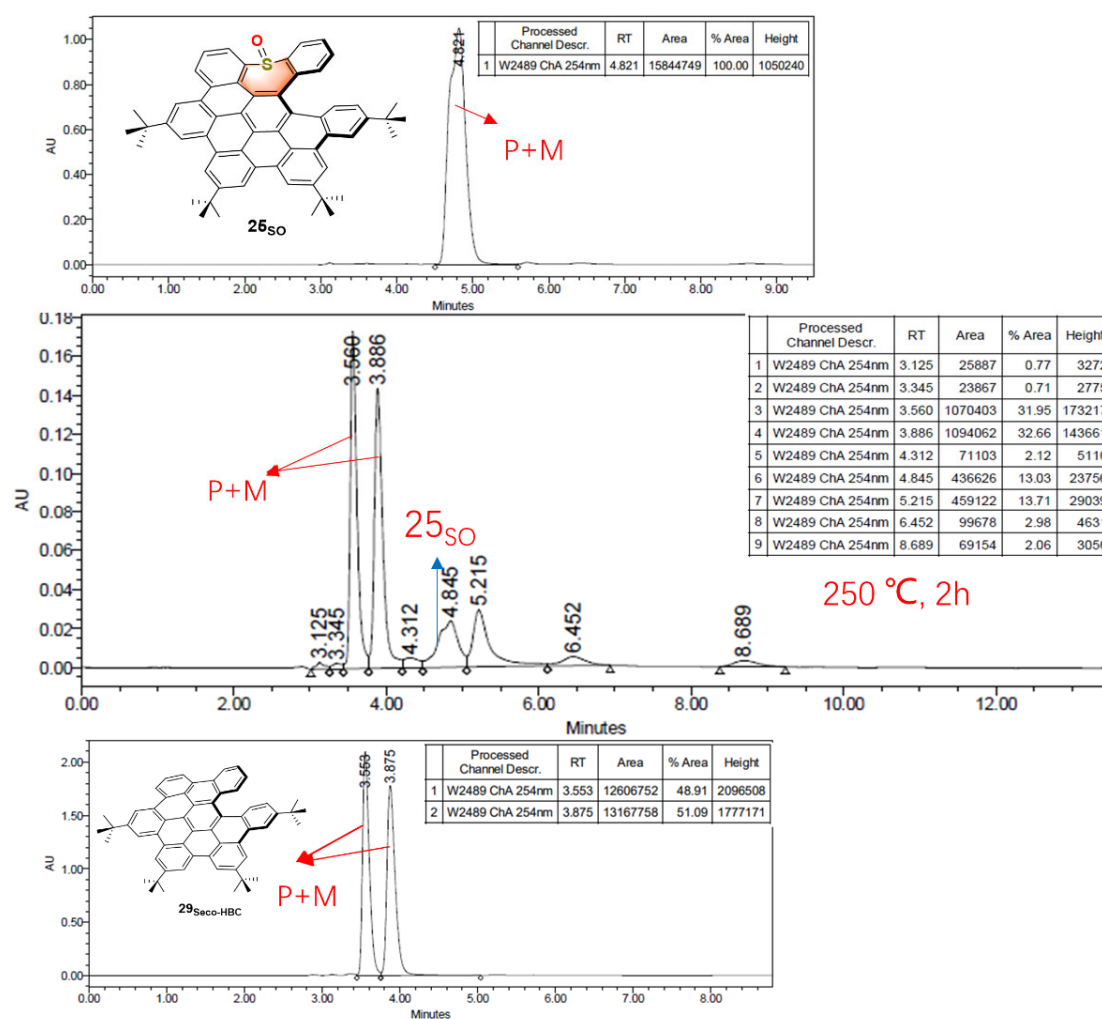

**Figure S19.** Thermal sulfur-extrusion of **25<sub>SO</sub>** at 250 °C was analyzed by chiral HPLC. (a) Scheme for thermal sulfur-extrusion of **25<sub>SO</sub>**. (b) Chiral HPLC trace for the conversion of **25<sub>SO</sub>** powder reacted at 250 °C for 2 hours, dissolve the powder with *n*-hexane and analyze with analytic OD-3 column, eluent: *n*-hexane/isopropanol = 90:10, v/v; flow rate: 1.0 mL/min; detected by absorption at 254 nm. The sulfur-extrusion did not react completely with the unreacted **25<sub>SO</sub>** left.

(a)

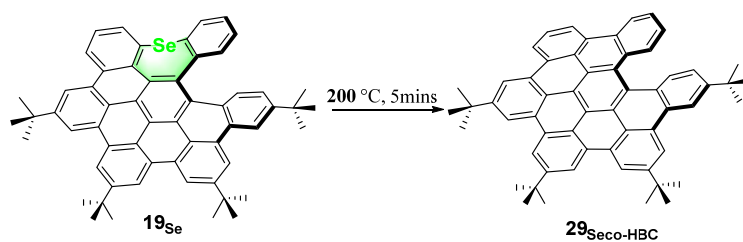

(b)

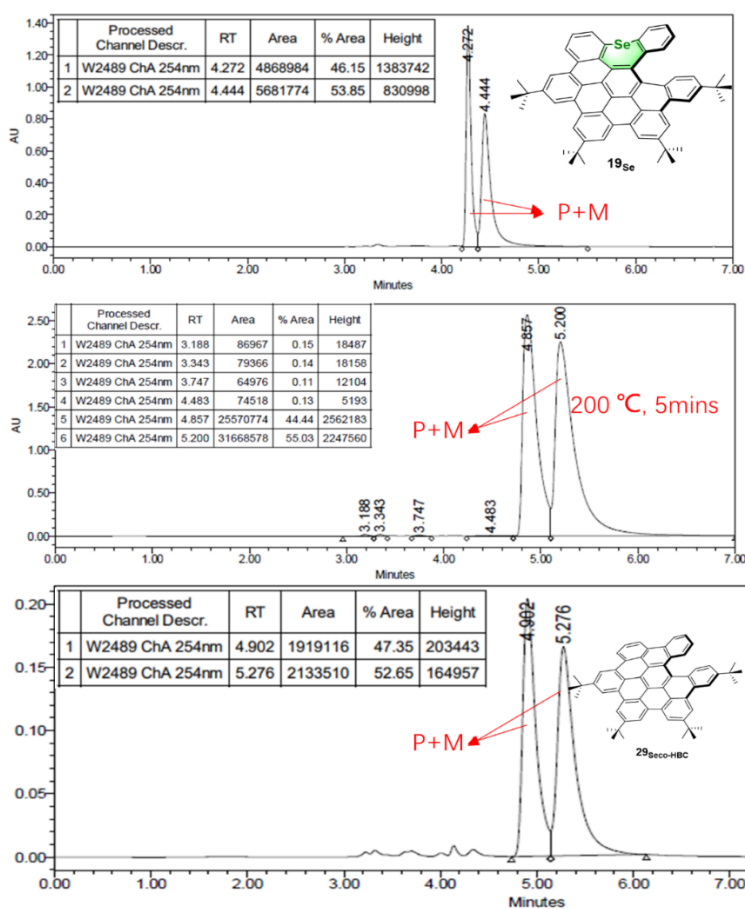

**Figure S20.** Thermal sulfur-extrusion of **19<sub>Se</sub>** at 200 °C was analyzed by chiral HPLC. (a) Scheme for thermal sulfur-extrusion of **19<sub>Se</sub>**. (b) Chiral HPLC trace for the conversion of **19<sub>Se</sub>** powder reacted at 200 °C for 5 mins, dissolve the powder with *n*-hexane and analyze with analytic IE-3 column, eluent: *n*-hexane/isopropanol = 98:2, v/v; flow rate: 1.0 mL/min; detected by absorption at 254 nm. The **19<sub>Se</sub>** completely and quantitatively convert to **29<sub>Seco</sub>-HBC** through sulfur-extrusion reaction according to the HPLC chromatography.





(a)

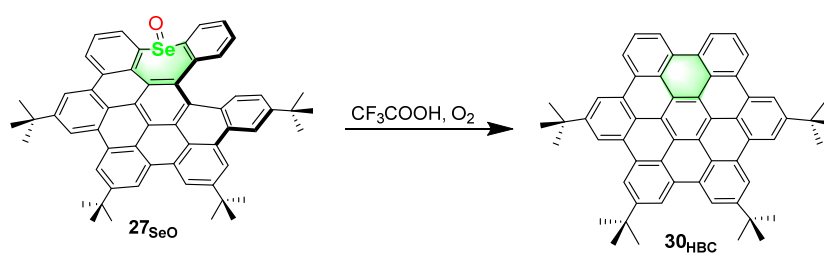

(b)

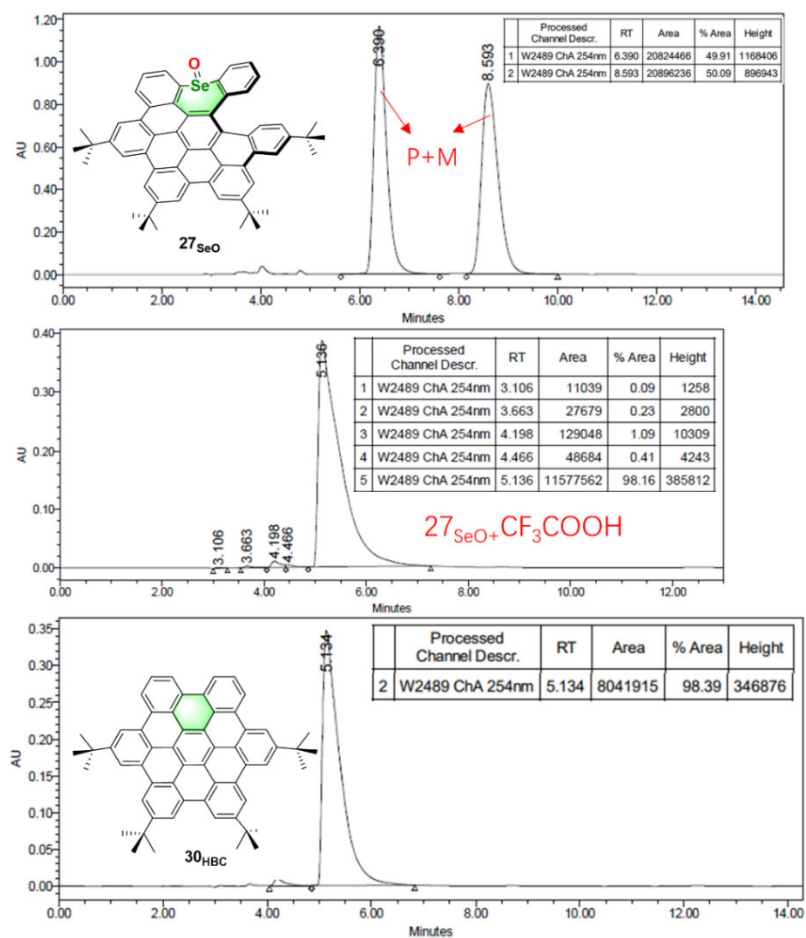

**Figure S22.** Sulfur-extrusion and cyclization reaction of **27<sub>SeO</sub>** in acid was analyzed by chiral HPLC. (a) Scheme for thermal sulfur-extrusion of **27<sub>SeO</sub>**. (b) Chiral HPLC trace for the conversion of **27<sub>SeO</sub>** in CF<sub>3</sub>COOH /DCM (1/2, v/v) reacted at room temperature for 20 hours. Solvent was removed under reduced pressure before analyzing with analytic OD-3 column, eluent before analyzing with eluent: *n*-hexane/isopropanol = 90:10, v/v; flow rate: 1.0 mL/min; detected by absorption at 254 nm. **27<sub>SeO</sub>** quantitatively converted to **30<sub>HBC</sub>** according to the HPLC spectra.

a)

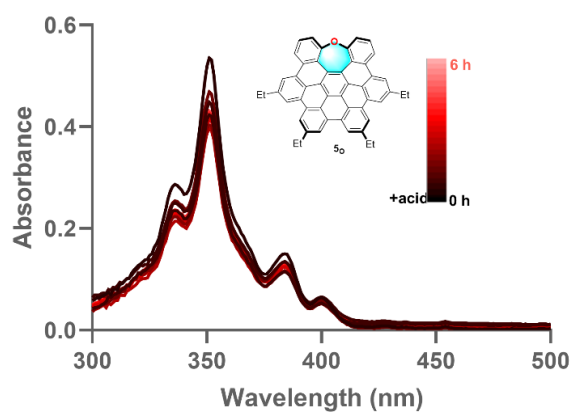

b)

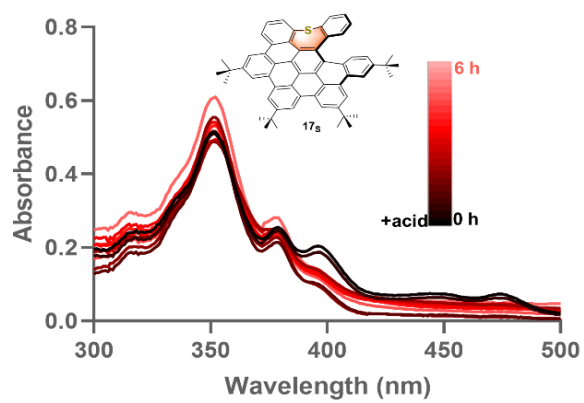

c)

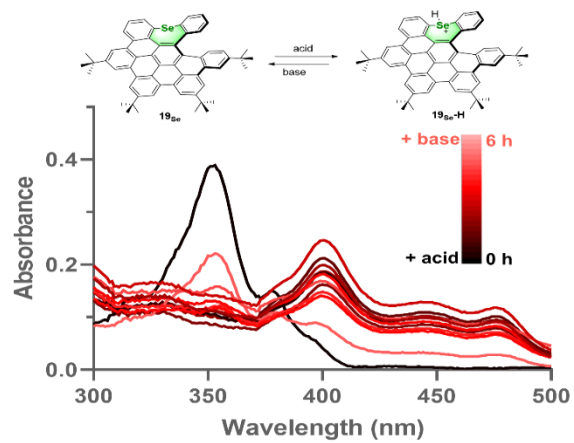

d)

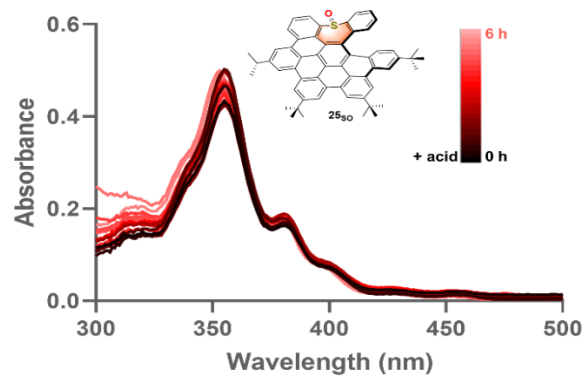

e)

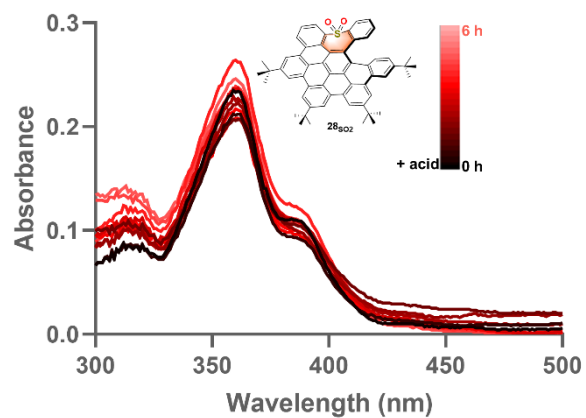

**Figure S23.** Changes in the UV/vis absorption spectra of **5<sub>O</sub>** (a), **17<sub>S</sub>** (b), **19<sub>Se</sub>** (c), **25<sub>so</sub>** (d), and **28<sub>so2</sub>** (e) upon the addition of trifluoroacetic acid (TFA) in dichloromethane (1:2, v/v).

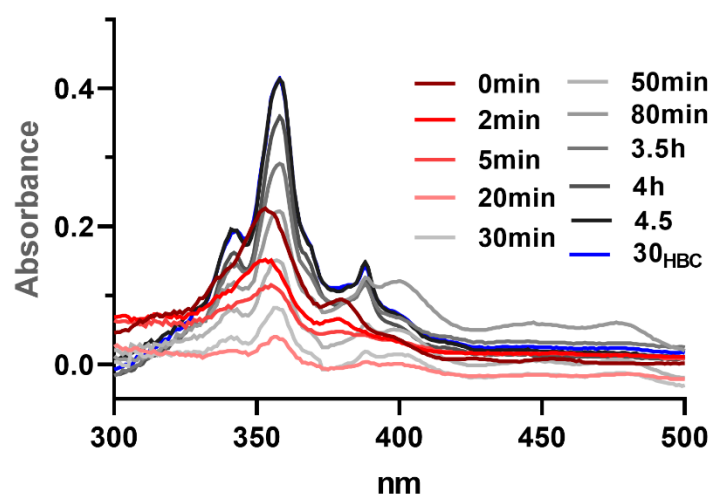

**Figure S24.** (c) Changes in the UV-vis absorption spectra of **27<sub>seo</sub>** upon dissolving it in methanesulfonic acid /DCM (1/2, v/v) with 3.3  $\mu\text{M}$  concentration under ambient conditions.

a)

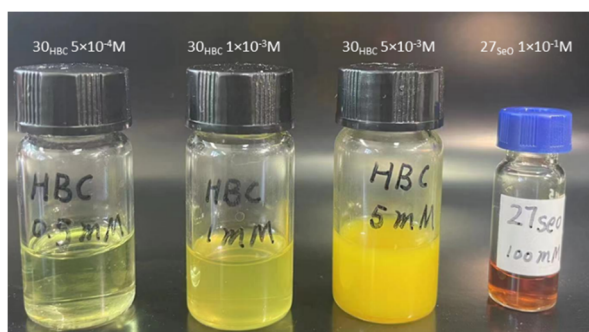

b)

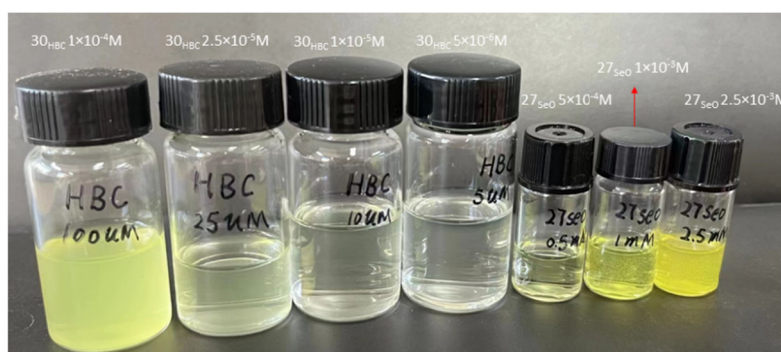

c)

| Compound                | Solubility in DCM                                          | Solubility in EtOH                                         |
|-------------------------|------------------------------------------------------------|------------------------------------------------------------|
| <b>27<sub>SeO</sub></b> | $>1 \times 10^{-1} \text{M}$                               | $5 \times 10^{-4} \text{M} \sim 1 \times 10^{-3} \text{M}$ |
| <b>30<sub>HBC</sub></b> | $5 \times 10^{-4} \text{M} \sim 1 \times 10^{-3} \text{M}$ | $<5 \times 10^{-6} \text{M}$                               |

**Figure S25** Solubility of **27<sub>SeO</sub>** and **30<sub>HBC</sub>** in DCM (a) and EtOH (b) at different concentration at room temperature. And the results were summarized in a table (c). Based on the measurement, the solubility of **27<sub>SeO</sub>** is more than 100-fold higher than that of **30<sub>HBC</sub>** in both DCM and EtOH.

## Computational Details

Geometry calculations of the compounds were carried out by DFT methods using the Gaussian 16 program package.<sup>[S8]</sup> Different alkyl chains were replaced by methyl group. The optimizations of structures were carried out at the CAM-B3LYP/6-31+G(d,p) level of theory in gas phase. The nucleus independent chemical shift NICS (0) calculations were performed at the B3LYP-GIAO/6-311++G(d,p) level. Electronic transitions of the *M* and *P* enantiomers for calculated ECD spectra of **16<sub>S</sub>** and **18<sub>Se</sub>** were calculated by means of TD-DFT methods at B3LYP/6-31G(d,p) theory level and the first 40 excited states were considered in the gas phase. The atomic coordinates of the calculated structures are shown in Tables S4–S9. TD-DFT calculated molecular orbits and transitions in the excited states were performed at PBE0/6-311G(d,p). The major transitions of 9 excited states calculated by TD-DFT are shown in Tables S10-S15

(a)

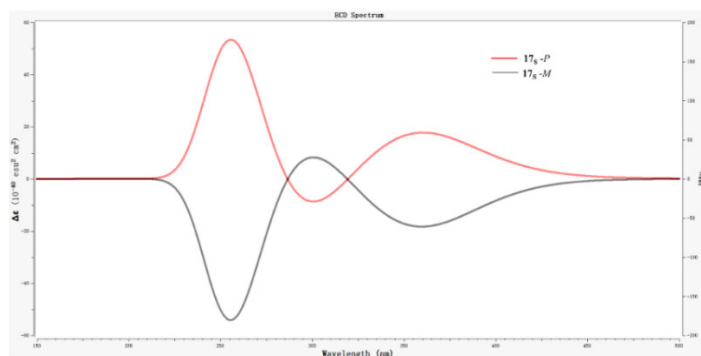

(b)

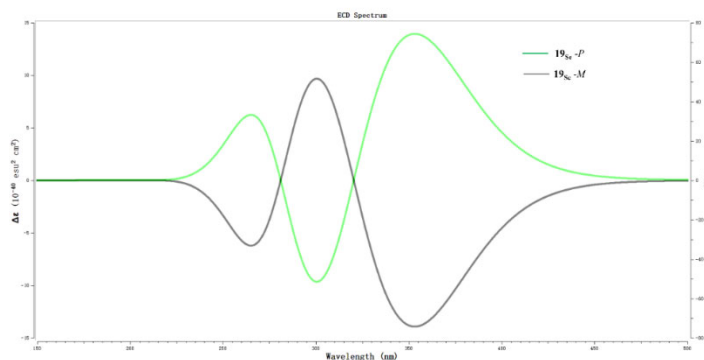

**Figure S26.** Calculated ECD spectra of **17<sub>S</sub>-P** and **17<sub>S</sub>-M** (a); Calculated ECD spectra of **19<sub>Se</sub>-P** and **19<sub>Se</sub>-M** (b)

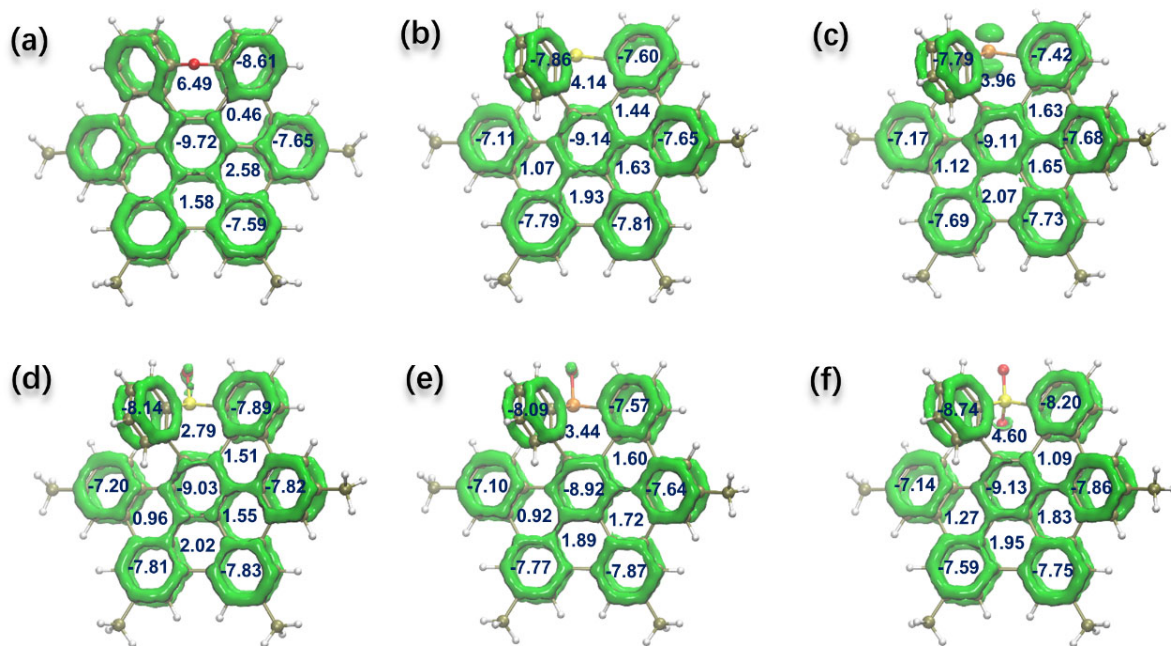

**Figure S27.** Isosurface of LOL- $\pi$  of backbones **5<sub>o</sub>** (a), **16<sub>s</sub>** (b), **18<sub>se</sub>** (c), **24<sub>so</sub>** (d), **26<sub>seo</sub>** (e), and **28<sub>so2</sub>** (f) with calculated NICS(0) values..

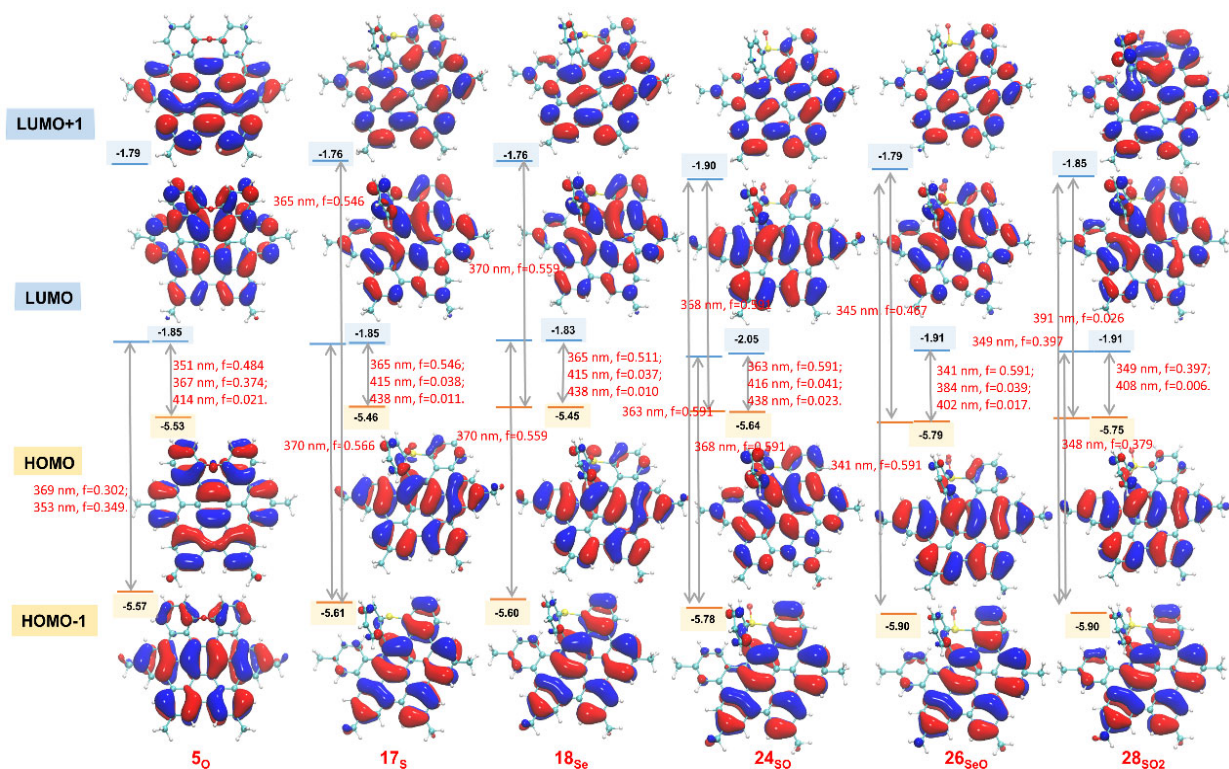

**Figure. S28** Molecular orbitals (HOMO-1–LUMO+1) with major transitions of **5<sub>o</sub>**, **17<sub>s</sub>**, **18<sub>se</sub>**, **24<sub>so</sub>**, **26<sub>seo</sub>**, and **28<sub>so2</sub>** calculated by DFT at the PBE0/6-311G+G(d,p) level of theory.

**Table S4.** Atomic coordinates for the DFT calculated structure of **5<sub>0</sub>**:

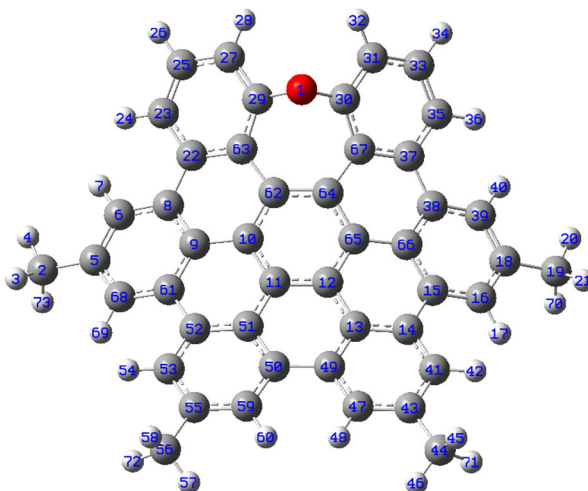

|                                              |                             |
|----------------------------------------------|-----------------------------|
| Zero-point correction=                       | 0.579055 (Hartree/Particle) |
| Thermal correction to Energy=                | 0.610567                    |
| Thermal correction to Enthalpy=              | 0.611511                    |
| Thermal correction to Gibbs Free Energy=     | 0.517870                    |
| Sum of electronic and zero-point Energies=   | -1842.383087                |
| Sum of electronic and thermal Energies=      | -1842.351576                |
| Sum of electronic and thermal Enthalpies=    | -1842.350632                |
| Sum of electronic and thermal Free Energies= | -1842.444273                |

| Center Number | Atomic Number | Atomic Type | Coordinates (Angstroms) |           |           |
|---------------|---------------|-------------|-------------------------|-----------|-----------|
|               |               |             | X                       | Y         | Z         |
| 1             | 8             | 0           | -0.000051               | -3.885666 | -1.761040 |
| 2             | 6             | 0           | -6.794474               | -0.112972 | 1.905195  |
| 3             | 1             | 0           | -7.511477               | 0.375827  | 1.238599  |
| 4             | 1             | 0           | -7.173150               | -1.112534 | 2.128541  |
| 5             | 6             | 0           | -5.423705               | -0.170333 | 1.285089  |
| 6             | 6             | 0           | -4.775798               | -1.378034 | 1.082398  |
| 7             | 1             | 0           | -5.289289               | -2.286674 | 1.370872  |
| 8             | 6             | 0           | -3.493589               | -1.444216 | 0.530943  |
| 9             | 6             | 0           | -2.808948               | -0.251371 | 0.226566  |
| 10            | 6             | 0           | -1.399561               | -0.282423 | -0.113202 |
| 11            | 6             | 0           | -0.699342               | 0.948038  | -0.158125 |
| 12            | 6             | 0           | 0.699397                | 0.948005  | -0.158130 |
| 13            | 6             | 0           | 1.417018                | 2.200540  | -0.196746 |
| 14            | 6             | 0           | 2.818005                | 2.218824  | -0.029290 |
| 15            | 6             | 0           | 3.490832                | 0.980857  | 0.362266  |
| 16            | 6             | 0           | 4.776843                | 0.996732  | 0.893377  |
| 17            | 1             | 0           | 5.280124                | 1.944152  | 1.049431  |
| 18            | 6             | 0           | 5.423738                | -0.170555 | 1.285016  |

|    |   |   |           |           |           |
|----|---|---|-----------|-----------|-----------|
| 19 | 6 | 0 | 6.794451  | -0.113232 | 1.905249  |
| 20 | 1 | 0 | 7.174001  | -1.112904 | 2.126607  |
| 21 | 1 | 0 | 7.511028  | 0.377564  | 1.239675  |
| 22 | 6 | 0 | -2.873687 | -2.711536 | 0.154319  |
| 23 | 6 | 0 | -3.620142 | -3.901061 | 0.167417  |
| 24 | 1 | 0 | -4.622809 | -3.900629 | 0.572371  |
| 25 | 6 | 0 | -3.134201 | -5.065790 | -0.384952 |
| 26 | 1 | 0 | -3.734921 | -5.968850 | -0.375518 |
| 27 | 6 | 0 | -1.893913 | -5.052317 | -1.012042 |
| 28 | 1 | 0 | -1.502082 | -5.916333 | -1.535450 |
| 29 | 6 | 0 | -1.150932 | -3.891358 | -1.009351 |
| 30 | 6 | 0 | 1.150761  | -3.891433 | -1.009241 |
| 31 | 6 | 0 | 1.893638  | -5.052458 | -1.011800 |
| 32 | 1 | 0 | 1.501779  | -5.916473 | -1.535189 |
| 33 | 6 | 0 | 3.133871  | -5.066000 | -0.384601 |
| 34 | 1 | 0 | 3.734504  | -5.969116 | -0.375045 |
| 35 | 6 | 0 | 3.619879  | -3.901273 | 0.167716  |
| 36 | 1 | 0 | 4.622508  | -3.900913 | 0.572762  |
| 37 | 6 | 0 | 2.873537  | -2.711678 | 0.154468  |
| 38 | 6 | 0 | 3.493523  | -1.444371 | 0.531006  |
| 39 | 6 | 0 | 4.775761  | -1.378232 | 1.082395  |
| 40 | 1 | 0 | 5.289235  | -2.286885 | 1.370854  |
| 41 | 6 | 0 | 3.513388  | 3.410214  | -0.210906 |
| 42 | 1 | 0 | 4.594848  | 3.420151  | -0.135640 |
| 43 | 6 | 0 | 2.857150  | 4.598363  | -0.515059 |
| 44 | 6 | 0 | 3.636451  | 5.863590  | -0.757923 |
| 45 | 1 | 0 | 4.043463  | 5.885395  | -1.774466 |
| 46 | 1 | 0 | 3.007899  | 6.748693  | -0.636833 |
| 47 | 6 | 0 | 1.472707  | 4.586170  | -0.594142 |
| 48 | 1 | 0 | 0.966872  | 5.523429  | -0.790837 |
| 49 | 6 | 0 | 0.731265  | 3.413518  | -0.428316 |
| 50 | 6 | 0 | -0.731095 | 3.413555  | -0.428273 |
| 51 | 6 | 0 | -1.416899 | 2.200612  | -0.196703 |
| 52 | 6 | 0 | -2.817884 | 2.218966  | -0.029195 |
| 53 | 6 | 0 | -3.513209 | 3.410393  | -0.210747 |
| 54 | 1 | 0 | -4.594667 | 3.420383  | -0.135443 |
| 55 | 6 | 0 | -2.856916 | 4.598525  | -0.514877 |
| 56 | 6 | 0 | -3.636188 | 5.863799  | -0.757588 |
| 57 | 1 | 0 | -3.007246 | 6.748813  | -0.637888 |
| 58 | 1 | 0 | -4.044517 | 5.885030  | -1.773613 |
| 59 | 6 | 0 | -1.472484 | 4.586257  | -0.594028 |
| 60 | 1 | 0 | -0.966606 | 5.523493  | -0.790717 |
| 61 | 6 | 0 | -3.490766 | 0.981017  | 0.362325  |



|    |   |   |           |           |           |
|----|---|---|-----------|-----------|-----------|
| 62 | 6 | 0 | -0.716938 | -1.505857 | -0.303732 |
| 63 | 6 | 0 | -1.559465 | -2.712059 | -0.368277 |
| 64 | 6 | 0 | 0.716878  | -1.505890 | -0.303715 |
| 65 | 6 | 0 | 1.399557  | -0.282488 | -0.113187 |
| 66 | 6 | 0 | 2.808943  | -0.251500 | 0.226584  |
| 67 | 6 | 0 | 1.559343  | -2.712138 | -0.368194 |
| 68 | 6 | 0 | -4.776754 | 0.996938  | 0.893489  |
| 69 | 1 | 0 | -5.279965 | 1.944381  | 1.049630  |
| 70 | 1 | 0 | 6.781337  | 0.454122  | 2.841003  |
| 71 | 1 | 0 | 4.480412  | 5.950987  | -0.068704 |
| 72 | 1 | 0 | -4.479240 | 5.951883  | -0.067337 |
| 73 | 1 | 0 | -6.781897 | 0.456295  | 2.839785  |

**Table S5.** Atomic coordinates for the DFT calculated structure of **16s**:

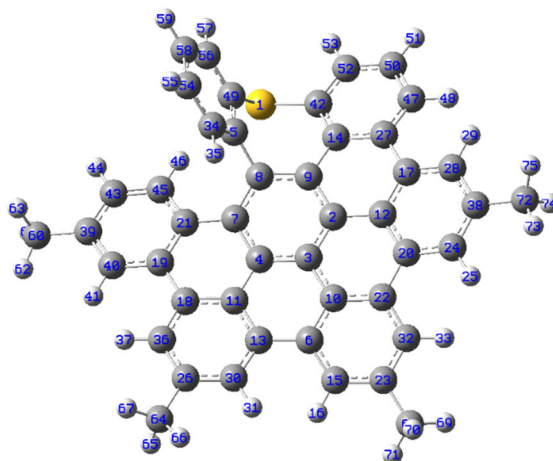

|                                              |                             |
|----------------------------------------------|-----------------------------|
| Zero-point correction=                       | 0.598352 (Hartree/Particle) |
| Thermal correction to Energy=                | 0.633281                    |
| Thermal correction to Enthalpy=              | 0.634225                    |
| Thermal correction to Gibbs Free Energy=     | 0.531057                    |
| Sum of electronic and zero-point Energies=   | -2166.515673                |
| Sum of electronic and thermal Energies=      | -2166.480744                |
| Sum of electronic and thermal Enthalpies=    | -2166.479799                |
| Sum of electronic and thermal Free Energies= | -2166.582968                |

| Center Number | Atomic Number | Atomic Type | Coordinates (Angstroms) |           |           |
|---------------|---------------|-------------|-------------------------|-----------|-----------|
|               |               |             | X                       | Y         | Z         |
| 1             | 16            | 0           | 0.669339                | -4.045513 | -1.421178 |
| 2             | 6             | 0           | -1.440156               | -0.150681 | -0.165856 |
| 3             | 6             | 0           | -0.709947               | 1.057742  | -0.122804 |
| 4             | 6             | 0           | 0.703436                | 1.030618  | -0.141835 |

|    |   |   |           |           |           |
|----|---|---|-----------|-----------|-----------|
| 5  | 6 | 0 | 1.281512  | -2.559282 | 0.748222  |
| 6  | 6 | 0 | -0.681783 | 3.540380  | -0.159285 |
| 7  | 6 | 0 | 1.378112  | -0.207632 | -0.091772 |
| 8  | 6 | 0 | 0.630681  | -1.400817 | 0.060669  |
| 9  | 6 | 0 | -0.763163 | -1.400719 | -0.169305 |
| 10 | 6 | 0 | -1.403855 | 2.325842  | -0.118025 |
| 11 | 6 | 0 | 1.450790  | 2.269615  | -0.068563 |
| 12 | 6 | 0 | -2.880865 | -0.106654 | -0.028421 |
| 13 | 6 | 0 | 0.774654  | 3.510072  | -0.030733 |
| 14 | 6 | 0 | -1.560624 | -2.622049 | -0.402777 |
| 15 | 6 | 0 | -1.376930 | 4.740082  | -0.306602 |
| 16 | 1 | 0 | -0.831080 | 5.670746  | -0.404055 |
| 17 | 6 | 0 | -3.617865 | -1.302945 | 0.104101  |
| 18 | 6 | 0 | 2.860872  | 2.251904  | 0.046018  |
| 19 | 6 | 0 | 3.571786  | 0.985593  | -0.131021 |
| 20 | 6 | 0 | -3.557243 | 1.127556  | 0.084969  |
| 21 | 6 | 0 | 2.842453  | -0.212415 | -0.243133 |
| 22 | 6 | 0 | -2.814843 | 2.370013  | -0.099838 |
| 23 | 6 | 0 | -2.763507 | 4.785268  | -0.369222 |
| 24 | 6 | 0 | -4.911844 | 1.138122  | 0.422853  |
| 25 | 1 | 0 | -5.419826 | 2.083270  | 0.572237  |
| 26 | 6 | 0 | 2.881435  | 4.667002  | 0.345930  |
| 27 | 6 | 0 | -2.964442 | -2.571218 | -0.223500 |
| 28 | 6 | 0 | -4.961696 | -1.242361 | 0.467063  |
| 29 | 1 | 0 | -5.516161 | -2.155981 | 0.644455  |
| 30 | 6 | 0 | 1.504124  | 4.680026  | 0.182513  |
| 31 | 1 | 0 | 0.988996  | 5.629049  | 0.266622  |
| 32 | 6 | 0 | -3.465559 | 3.595220  | -0.245796 |
| 33 | 1 | 0 | -4.547400 | 3.627209  | -0.298166 |
| 34 | 6 | 0 | 1.803731  | -2.361094 | 2.029539  |
| 35 | 1 | 0 | 1.726266  | -1.379507 | 2.484288  |
| 36 | 6 | 0 | 3.541000  | 3.448202  | 0.270465  |
| 37 | 1 | 0 | 4.615124  | 3.441048  | 0.408775  |
| 38 | 6 | 0 | -5.622110 | -0.032217 | 0.639832  |
| 39 | 6 | 0 | 5.661863  | -0.199505 | -0.584724 |
| 40 | 6 | 0 | 4.969424  | 0.956576  | -0.287627 |
| 41 | 1 | 0 | 5.533866  | 1.877750  | -0.212776 |
| 42 | 6 | 0 | -1.031227 | -3.830497 | -0.931008 |
| 43 | 6 | 0 | 4.917598  | -1.370109 | -0.778614 |
| 44 | 1 | 0 | 5.419963  | -2.285835 | -1.076862 |
| 45 | 6 | 0 | 3.551457  | -1.369057 | -0.622018 |
| 46 | 1 | 0 | 3.012322  | -2.279177 | -0.828996 |
| 47 | 6 | 0 | -3.754020 | -3.700423 | -0.482824 |

|    |   |   |           |           |           |
|----|---|---|-----------|-----------|-----------|
| 48 | 1 | 0 | -4.828149 | -3.637107 | -0.373822 |
| 49 | 6 | 0 | 1.378366  | -3.831128 | 0.189726  |
| 50 | 6 | 0 | -3.204238 | -4.877679 | -0.935158 |
| 51 | 1 | 0 | -3.832677 | -5.738700 | -1.135876 |
| 52 | 6 | 0 | -1.838154 | -4.933098 | -1.171668 |
| 53 | 1 | 0 | -1.382955 | -5.835656 | -1.561840 |
| 54 | 6 | 0 | 2.432045  | -3.395578 | 2.709140  |
| 55 | 1 | 0 | 2.838038  | -3.218109 | 3.699591  |
| 56 | 6 | 0 | 2.005009  | -4.873767 | 0.863855  |
| 57 | 1 | 0 | 2.063431  | -5.850946 | 0.397095  |
| 58 | 6 | 0 | 2.543596  | -4.652352 | 2.124581  |
| 59 | 1 | 0 | 3.037899  | -5.460815 | 2.653004  |
| 60 | 6 | 0 | 7.158588  | -0.205014 | -0.736629 |
| 61 | 1 | 0 | 7.458748  | -0.642789 | -1.693372 |
| 62 | 1 | 0 | 7.570017  | 0.805344  | -0.684338 |
| 63 | 1 | 0 | 7.632327  | -0.799283 | 0.051554  |
| 64 | 6 | 0 | 3.644930  | 5.943901  | 0.577468  |
| 65 | 1 | 0 | 3.988484  | 6.374540  | -0.369289 |
| 66 | 1 | 0 | 3.024699  | 6.695273  | 1.071972  |
| 67 | 1 | 0 | 4.528596  | 5.772927  | 1.197154  |
| 68 | 6 | 0 | -3.484709 | 6.096592  | -0.535115 |
| 69 | 1 | 0 | -4.464445 | 5.956526  | -0.997731 |
| 70 | 1 | 0 | -3.645681 | 6.583539  | 0.432790  |
| 71 | 1 | 0 | -2.912784 | 6.789653  | -1.157031 |
| 72 | 6 | 0 | -7.076145 | 0.001301  | 1.028971  |
| 73 | 1 | 0 | -7.344084 | 0.955986  | 1.487189  |
| 74 | 1 | 0 | -7.721764 | -0.136587 | 0.154981  |
| 75 | 1 | 0 | -7.316427 | -0.794163 | 1.739041  |

**Table S6.** Atomic coordinates for the DFT calculated structure of **18<sub>Se</sub>**: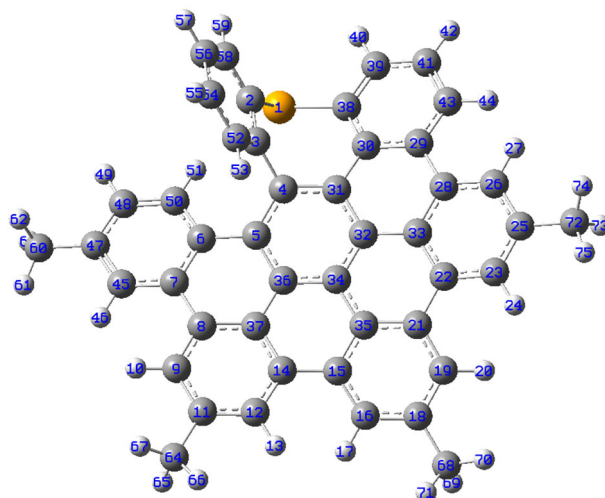

|                                              |                             |
|----------------------------------------------|-----------------------------|
| Zero-point correction=                       | 0.597789 (Hartree/Particle) |
| Thermal correction to Energy=                | 0.633053                    |
| Thermal correction to Enthalpy=              | 0.633997                    |
| Thermal correction to Gibbs Free Energy=     | 0.530163                    |
| Sum of electronic and zero-point Energies=   | -4167.807097                |
| Sum of electronic and thermal Energies=      | -4167.771833                |
| Sum of electronic and thermal Enthalpies=    | -4167.770889                |
| Sum of electronic and thermal Free Energies= | -4167.874723                |

| Center Number | Atomic Number | Atomic Type | Coordinates (Angstroms) |           |           |
|---------------|---------------|-------------|-------------------------|-----------|-----------|
|               |               |             | X                       | Y         | Z         |
| 1             | 34            | 0           | 3.002881                | -2.519553 | -1.346554 |
| 2             | 6             | 0           | 3.355969                | -1.898885 | 0.404339  |
| 3             | 6             | 0           | 2.420369                | -1.003146 | 0.912493  |
| 4             | 6             | 0           | 1.204582                | -0.543493 | 0.161826  |
| 5             | 6             | 0           | 1.026271                | 0.848216  | -0.023061 |
| 6             | 6             | 0           | 2.163779                | 1.767806  | -0.167837 |
| 7             | 6             | 0           | 1.973960                | 3.156829  | -0.055739 |
| 8             | 6             | 0           | 0.618747                | 3.689740  | 0.090428  |
| 9             | 6             | 0           | 0.383557                | 5.047385  | 0.301639  |
| 10            | 1             | 0           | 1.216794                | 5.722149  | 0.455544  |
| 11            | 6             | 0           | -0.900221               | 5.574459  | 0.341821  |
| 12            | 6             | 0           | -1.971299               | 4.713111  | 0.155148  |
| 13            | 1             | 0           | -2.972337               | 5.123043  | 0.211032  |
| 14            | 6             | 0           | -1.791455               | 3.344098  | -0.046065 |
| 15            | 6             | 0           | -2.934380               | 2.444391  | -0.201199 |
| 16            | 6             | 0           | -4.227320               | 2.930913  | -0.390718 |
| 17            | 1             | 0           | -4.391961               | 3.996259  | -0.498499 |
| 18            | 6             | 0           | -5.325895               | 2.086087  | -0.480887 |
| 19            | 6             | 0           | -5.120944               | 0.722361  | -0.327423 |

|    |   |   |           |           |           |
|----|---|---|-----------|-----------|-----------|
| 20 | 1 | 0 | -5.978435 | 0.062618  | -0.387779 |
| 21 | 6 | 0 | -3.846686 | 0.187922  | -0.137315 |
| 22 | 6 | 0 | -3.639498 | -1.239842 | 0.086285  |
| 23 | 6 | 0 | -4.704470 | -2.081003 | 0.412629  |
| 24 | 1 | 0 | -5.700728 | -1.668745 | 0.518399  |
| 25 | 6 | 0 | -4.519734 | -3.430060 | 0.672608  |
| 26 | 6 | 0 | -3.236846 | -3.950807 | 0.560716  |
| 27 | 1 | 0 | -3.095857 | -5.003639 | 0.772375  |
| 28 | 6 | 0 | -2.145856 | -3.156826 | 0.212029  |
| 29 | 6 | 0 | -0.824687 | -3.732912 | -0.048171 |
| 30 | 6 | 0 | 0.288246  | -2.884869 | -0.265253 |
| 31 | 6 | 0 | 0.128537  | -1.429911 | -0.075589 |
| 32 | 6 | 0 | -1.186318 | -0.892693 | -0.106444 |
| 33 | 6 | 0 | -2.331311 | -1.769376 | 0.026116  |
| 34 | 6 | 0 | -1.388295 | 0.505389  | -0.096321 |
| 35 | 6 | 0 | -2.726827 | 1.047529  | -0.136788 |
| 36 | 6 | 0 | -0.277737 | 1.378706  | -0.104459 |
| 37 | 6 | 0 | -0.482654 | 2.811565  | -0.047922 |
| 38 | 6 | 0 | 1.468185  | -3.496267 | -0.759571 |
| 39 | 6 | 0 | 1.573857  | -4.871253 | -0.891905 |
| 40 | 1 | 0 | 2.508760  | -5.291587 | -1.242745 |
| 41 | 6 | 0 | 0.495064  | -5.693928 | -0.597766 |
| 42 | 1 | 0 | 0.576414  | -6.769648 | -0.711334 |
| 43 | 6 | 0 | -0.693283 | -5.119814 | -0.207731 |
| 44 | 1 | 0 | -1.553108 | -5.759196 | -0.061380 |
| 45 | 6 | 0 | 3.082267  | 4.011822  | -0.191638 |
| 46 | 1 | 0 | 2.943613  | 5.083052  | -0.111822 |
| 47 | 6 | 0 | 4.350579  | 3.545966  | -0.475038 |
| 48 | 6 | 0 | 4.507320  | 2.169484  | -0.683725 |
| 49 | 1 | 0 | 5.474902  | 1.775935  | -0.981684 |
| 50 | 6 | 0 | 3.441421  | 1.311859  | -0.544347 |
| 51 | 1 | 0 | 3.579365  | 0.268370  | -0.777990 |
| 52 | 6 | 0 | 2.612081  | -0.527402 | 2.212311  |
| 53 | 1 | 0 | 1.891525  | 0.164337  | 2.635275  |
| 54 | 6 | 0 | 3.718713  | -0.918143 | 2.955724  |
| 55 | 1 | 0 | 3.852550  | -0.530719 | 3.960408  |
| 56 | 6 | 0 | 4.650561  | -1.800194 | 2.419877  |
| 57 | 1 | 0 | 5.515008  | -2.104296 | 3.000909  |
| 58 | 6 | 0 | 4.463636  | -2.299265 | 1.137070  |
| 59 | 1 | 0 | 5.163603  | -3.003313 | 0.701041  |
| 60 | 6 | 0 | 5.522533  | 4.480935  | -0.601349 |
| 61 | 1 | 0 | 5.207183  | 5.525847  | -0.561613 |
| 62 | 1 | 0 | 6.243737  | 4.319662  | 0.206600  |

|    |   |   |           |           |           |
|----|---|---|-----------|-----------|-----------|
| 63 | 1 | 0 | 6.055603  | 4.324487  | -1.543872 |
| 64 | 6 | 0 | -1.121256 | 7.047808  | 0.559907  |
| 65 | 1 | 0 | -1.081511 | 7.596570  | -0.387249 |
| 66 | 1 | 0 | -2.097831 | 7.242262  | 1.009531  |
| 67 | 1 | 0 | -0.356340 | 7.472740  | 1.214563  |
| 68 | 6 | 0 | -6.699924 | 2.635779  | -0.758108 |
| 69 | 1 | 0 | -6.876418 | 2.728202  | -1.835155 |
| 70 | 1 | 0 | -7.478984 | 1.984974  | -0.354110 |
| 71 | 1 | 0 | -6.827897 | 3.629068  | -0.320834 |
| 72 | 6 | 0 | -5.679761 | -4.315350 | 1.043372  |
| 73 | 1 | 0 | -6.086058 | -4.822962 | 0.161879  |
| 74 | 1 | 0 | -5.378876 | -5.088981 | 1.754307  |
| 75 | 1 | 0 | -6.492170 | -3.740015 | 1.493214  |

**Table S7.** Atomic coordinates for the DFT calculated structure of **24<sub>SO</sub>**:

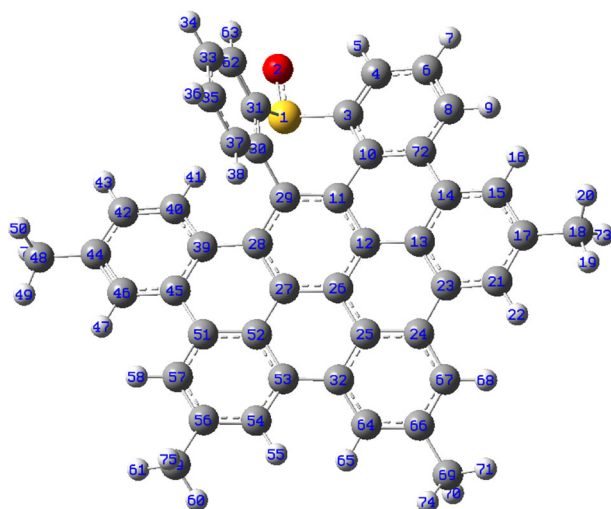

|                                              |                             |
|----------------------------------------------|-----------------------------|
| Zero-point correction=                       | 0.602334 (Hartree/Particle) |
| Thermal correction to Energy=                | 0.638225                    |
| Thermal correction to Enthalpy=              | 0.639169                    |
| Thermal correction to Gibbs Free Energy=     | 0.534100                    |
| Sum of electronic and zero-point Energies=   | -2241.667325                |
| Sum of electronic and thermal Energies=      | -2241.631434                |
| Sum of electronic and thermal Enthalpies=    | -2241.630490                |
| Sum of electronic and thermal Free Energies= | -2241.735559                |

| Center Number | Atomic Number | Atomic Type | Coordinates (Angstroms) |           |           |
|---------------|---------------|-------------|-------------------------|-----------|-----------|
|               |               |             | X                       | Y         | Z         |
| 1             | 16            | 0           | 2.381576                | -3.127881 | -1.358143 |
| 2             | 8             | 0           | 3.207148                | -4.316460 | -1.775142 |
| 3             | 6             | 0           | 0.798723                | -3.767214 | -0.753104 |

|    |   |   |           |           |           |
|----|---|---|-----------|-----------|-----------|
| 4  | 6 | 0 | 0.664203  | -5.131913 | -0.894031 |
| 5  | 1 | 0 | 1.510884  | -5.692988 | -1.275449 |
| 6  | 6 | 0 | -0.548131 | -5.733715 | -0.578569 |
| 7  | 1 | 0 | -0.671703 | -6.806515 | -0.680972 |
| 8  | 6 | 0 | -1.611419 | -4.944976 | -0.198818 |
| 9  | 1 | 0 | -2.573560 | -5.415262 | -0.047298 |
| 10 | 6 | 0 | -0.236864 | -2.934168 | -0.272303 |
| 11 | 6 | 0 | -0.102601 | -1.477827 | -0.095521 |
| 12 | 6 | 0 | -1.285171 | -0.693060 | -0.117333 |
| 13 | 6 | 0 | -2.579740 | -1.329622 | 0.009127  |
| 14 | 6 | 0 | -2.674606 | -2.728988 | 0.183292  |
| 15 | 6 | 0 | -3.905367 | -3.294335 | 0.510161  |
| 16 | 1 | 0 | -3.979174 | -4.357188 | 0.704843  |
| 17 | 6 | 0 | -5.060461 | -2.530351 | 0.618782  |
| 18 | 6 | 0 | -6.377047 | -3.172457 | 0.966330  |
| 19 | 1 | 0 | -7.070531 | -2.449240 | 1.401335  |
| 20 | 1 | 0 | -6.245603 | -3.988164 | 1.681709  |
| 21 | 6 | 0 | -4.970633 | -1.168376 | 0.377224  |
| 22 | 1 | 0 | -5.866449 | -0.568331 | 0.481367  |
| 23 | 6 | 0 | -3.757122 | -0.551909 | 0.067692  |
| 24 | 6 | 0 | -3.675093 | 0.890365  | -0.143694 |
| 25 | 6 | 0 | -2.407236 | 1.512218  | -0.138358 |
| 26 | 6 | 0 | -1.201666 | 0.716377  | -0.101800 |
| 27 | 6 | 0 | 0.062283  | 1.352130  | -0.111256 |
| 28 | 6 | 0 | 1.238811  | 0.575213  | -0.043280 |
| 29 | 6 | 0 | 1.133696  | -0.827524 | 0.121544  |
| 30 | 6 | 0 | 2.245855  | -1.551732 | 0.817611  |
| 31 | 6 | 0 | 2.904706  | -2.648483 | 0.280823  |
| 32 | 6 | 0 | -2.334980 | 2.922564  | -0.196456 |
| 33 | 6 | 0 | 4.298847  | -2.888848 | 2.197029  |
| 34 | 1 | 0 | 5.094544  | -3.396507 | 2.731979  |
| 35 | 6 | 0 | 3.651023  | -1.800076 | 2.773381  |
| 36 | 1 | 0 | 3.939731  | -1.460078 | 3.762480  |
| 37 | 6 | 0 | 2.636034  | -1.137743 | 2.093706  |
| 38 | 1 | 0 | 2.139760  | -0.286805 | 2.547616  |
| 39 | 6 | 0 | 2.536302  | 1.255394  | -0.187633 |
| 40 | 6 | 0 | 3.709945  | 0.563356  | -0.545460 |
| 41 | 1 | 0 | 3.667637  | -0.496239 | -0.738272 |
| 42 | 6 | 0 | 4.918293  | 1.201503  | -0.696704 |
| 43 | 1 | 0 | 5.794278  | 0.625110  | -0.979468 |
| 44 | 6 | 0 | 5.023730  | 2.586551  | -0.516238 |
| 45 | 6 | 0 | 2.617352  | 2.656564  | -0.087094 |
| 46 | 6 | 0 | 3.866879  | 3.284975  | -0.236700 |

|    |   |   |           |           |           |
|----|---|---|-----------|-----------|-----------|
| 47 | 1 | 0 | 3.932532  | 4.363815  | -0.170659 |
| 48 | 6 | 0 | 6.349192  | 3.282550  | -0.662907 |
| 49 | 1 | 0 | 6.238798  | 4.368065  | -0.616556 |
| 50 | 1 | 0 | 7.040839  | 2.982922  | 0.131108  |
| 51 | 6 | 0 | 1.394286  | 3.443125  | 0.073466  |
| 52 | 6 | 0 | 0.141551  | 2.797295  | -0.050783 |
| 53 | 6 | 0 | -1.036723 | 3.577348  | -0.040397 |
| 54 | 6 | 0 | -0.942904 | 4.954634  | 0.161275  |
| 55 | 1 | 0 | -1.843115 | 5.554161  | 0.217618  |
| 56 | 6 | 0 | 0.277158  | 5.588147  | 0.344694  |
| 57 | 6 | 0 | 1.432121  | 4.820435  | 0.285777  |
| 58 | 1 | 0 | 2.382967  | 5.319715  | 0.425203  |
| 59 | 6 | 0 | 0.347564  | 7.065037  | 0.628848  |
| 60 | 1 | 0 | -0.522869 | 7.590063  | 0.228731  |
| 61 | 1 | 0 | 1.243463  | 7.512764  | 0.191690  |
| 62 | 6 | 0 | 3.922495  | -3.322201 | 0.932004  |
| 63 | 1 | 0 | 4.394977  | -4.162045 | 0.433176  |
| 64 | 6 | 0 | -3.505994 | 3.656288  | -0.381346 |
| 65 | 1 | 0 | -3.457086 | 4.733597  | -0.483406 |
| 66 | 6 | 0 | -4.749780 | 3.045782  | -0.474812 |
| 67 | 6 | 0 | -4.818213 | 1.667685  | -0.329698 |
| 68 | 1 | 0 | -5.789230 | 1.191381  | -0.393672 |
| 69 | 6 | 0 | -5.988026 | 3.857738  | -0.746848 |
| 70 | 1 | 0 | -6.140294 | 3.992596  | -1.823053 |
| 71 | 1 | 0 | -6.880712 | 3.369465  | -0.349058 |
| 72 | 6 | 0 | -1.489957 | -3.553456 | -0.061086 |
| 73 | 1 | 0 | -6.856878 | -3.593607 | 0.076385  |
| 74 | 1 | 0 | -5.918570 | 4.852759  | -0.300514 |
| 75 | 1 | 0 | 0.379725  | 7.256931  | 1.706719  |
| 76 | 1 | 0 | 6.825364  | 3.031580  | -1.615389 |



**Table S8.** Atomic coordinates for the DFT calculated structure of **26**<sub>SeO</sub>:

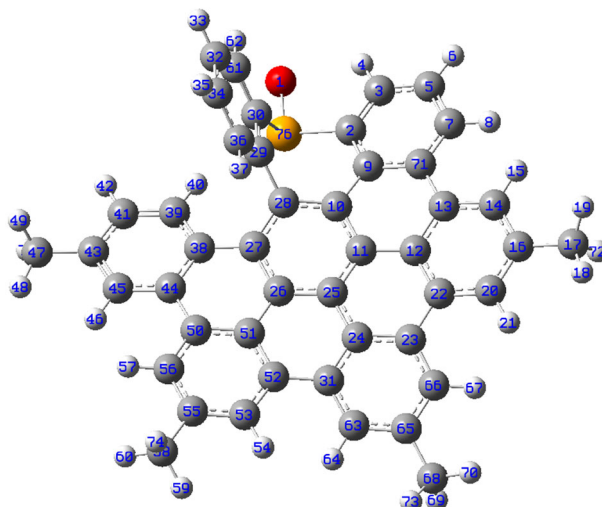

|                                              |                             |
|----------------------------------------------|-----------------------------|
| Zero-point correction=                       | 0.601066 (Hartree/Particle) |
| Thermal correction to Energy=                | 0.637415                    |
| Thermal correction to Enthalpy=              | 0.638359                    |
| Thermal correction to Gibbs Free Energy=     | 0.532158                    |
| Sum of electronic and zero-point Energies=   | -4242.954330                |
| Sum of electronic and thermal Energies=      | -4242.917982                |
| Sum of electronic and thermal Enthalpies=    | -4242.917037                |
| Sum of electronic and thermal Free Energies= | -4243.023238                |

| Center Number | Atomic Number | Atomic Type | Coordinates (Angstroms) |           |           |
|---------------|---------------|-------------|-------------------------|-----------|-----------|
|               |               |             | X                       | Y         | Z         |
| 1             | 8             | 0           | 5.275177                | -1.077329 | -1.583300 |
| 2             | 6             | 0           | 2.893679                | -2.265236 | -0.603436 |
| 3             | 6             | 0           | 3.729063                | -3.356948 | -0.653016 |
| 4             | 1             | 0           | 4.748016                | -3.206271 | -0.998947 |
| 5             | 6             | 0           | 3.228022                | -4.603968 | -0.293741 |
| 6             | 1             | 0           | 3.865594                | -5.481311 | -0.320989 |
| 7             | 6             | 0           | 1.893879                | -4.726529 | 0.032060  |
| 8             | 1             | 0           | 1.498853                | -5.716572 | 0.216661  |
| 9             | 6             | 0           | 1.560252                | -2.325561 | -0.153972 |
| 10            | 6             | 0           | 0.695280                | -1.142902 | -0.011358 |
| 11            | 6             | 0           | -0.708334               | -1.339506 | -0.063918 |
| 12            | 6             | 0           | -1.256898               | -2.675079 | 0.055892  |
| 13            | 6             | 0           | -0.405515               | -3.784224 | 0.271183  |
| 14            | 6             | 0           | -0.964168               | -5.023390 | 0.576014  |
| 15            | 1             | 0           | -0.322609               | -5.869277 | 0.790245  |
| 16            | 6             | 0           | -2.338600               | -5.217822 | 0.632254  |

|    |   |   |           |           |           |
|----|---|---|-----------|-----------|-----------|
| 17 | 6 | 0 | -2.910406 | -6.572456 | 0.955544  |
| 18 | 1 | 0 | -3.927252 | -6.492738 | 1.346498  |
| 19 | 1 | 0 | -2.302001 | -7.094543 | 1.698315  |
| 20 | 6 | 0 | -3.165356 | -4.138517 | 0.362360  |
| 21 | 1 | 0 | -4.236703 | -4.283642 | 0.429407  |
| 22 | 6 | 0 | -2.655350 | -2.872619 | 0.068726  |
| 23 | 6 | 0 | -3.543866 | -1.738023 | -0.170375 |
| 24 | 6 | 0 | -3.008050 | -0.431458 | -0.149932 |
| 25 | 6 | 0 | -1.579918 | -0.228709 | -0.076599 |
| 26 | 6 | 0 | -1.054115 | 1.084507  | -0.078641 |
| 27 | 6 | 0 | 0.339648  | 1.281927  | 0.019840  |
| 28 | 6 | 0 | 1.187415  | 0.165208  | 0.217027  |
| 29 | 6 | 0 | 2.469914  | 0.369905  | 0.976219  |
| 30 | 6 | 0 | 3.720379  | 0.033110  | 0.483011  |
| 31 | 6 | 0 | -3.885739 | 0.673440  | -0.232633 |
| 32 | 6 | 0 | 4.826911  | 0.700893  | 2.474876  |
| 33 | 1 | 0 | 5.730911  | 0.834392  | 3.059887  |
| 34 | 6 | 0 | 3.589434  | 1.047730  | 3.010503  |
| 35 | 1 | 0 | 3.531084  | 1.449614  | 4.016749  |
| 36 | 6 | 0 | 2.420924  | 0.883564  | 2.274118  |
| 37 | 1 | 0 | 1.463170  | 1.156661  | 2.704144  |
| 38 | 6 | 0 | 0.864927  | 2.648807  | -0.116495 |
| 39 | 6 | 0 | 2.207154  | 2.901547  | -0.460949 |
| 40 | 1 | 0 | 2.867912  | 2.075736  | -0.668953 |
| 41 | 6 | 0 | 2.697396  | 4.178994  | -0.594305 |
| 42 | 1 | 0 | 3.738255  | 4.325452  | -0.867410 |
| 43 | 6 | 0 | 1.862318  | 5.288612  | -0.409510 |
| 44 | 6 | 0 | -0.001115 | 3.753454  | -0.023105 |
| 45 | 6 | 0 | 0.527282  | 5.050465  | -0.152315 |
| 46 | 1 | 0 | -0.134294 | 5.905364  | -0.087496 |
| 47 | 6 | 0 | 2.404192  | 6.686602  | -0.531178 |
| 48 | 1 | 0 | 1.604726  | 7.429985  | -0.501350 |
| 49 | 1 | 0 | 3.099308  | 6.911047  | 0.284353  |
| 50 | 6 | 0 | -1.442490 | 3.533221  | 0.103196  |
| 51 | 6 | 0 | -1.951677 | 2.220361  | -0.038231 |
| 52 | 6 | 0 | -3.350837 | 2.024163  | -0.061962 |
| 53 | 6 | 0 | -4.196908 | 3.118313  | 0.121122  |
| 54 | 1 | 0 | -5.269628 | 2.971645  | 0.150873  |
| 55 | 6 | 0 | -3.706179 | 4.400442  | 0.319088  |
| 56 | 6 | 0 | -2.331048 | 4.589963  | 0.295301  |
| 57 | 1 | 0 | -1.952727 | 5.593648  | 0.445204  |
| 58 | 6 | 0 | -4.637936 | 5.553600  | 0.581810  |
| 59 | 1 | 0 | -5.626575 | 5.373048  | 0.153573  |

|    |    |   |           |           |           |
|----|----|---|-----------|-----------|-----------|
| 60 | 1  | 0 | -4.250377 | 6.483581  | 0.158595  |
| 61 | 6  | 0 | 4.897644  | 0.185933  | 1.186016  |
| 62 | 1  | 0 | 5.828981  | -0.105084 | 0.710363  |
| 63 | 6  | 0 | -5.243312 | 0.446981  | -0.454888 |
| 64 | 1  | 0 | -5.917654 | 1.286196  | -0.575291 |
| 65 | 6  | 0 | -5.766874 | -0.834768 | -0.563247 |
| 66 | 6  | 0 | -4.909392 | -1.912667 | -0.394757 |
| 67 | 1  | 0 | -5.319833 | -2.912499 | -0.470116 |
| 68 | 6  | 0 | -7.224167 | -1.047473 | -0.875706 |
| 69 | 1  | 0 | -7.396952 | -1.051934 | -1.957242 |
| 70 | 1  | 0 | -7.581002 | -2.002774 | -0.483784 |
| 71 | 6  | 0 | 1.037278  | -3.615246 | 0.087468  |
| 72 | 1  | 0 | -2.950080 | -7.206195 | 0.063142  |
| 73 | 1  | 0 | -7.843295 | -0.253968 | -0.450168 |
| 74 | 1  | 0 | -4.770512 | 5.714811  | 1.657025  |
| 75 | 1  | 0 | 2.954103  | 6.818664  | -1.467652 |
| 76 | 34 | 0 | 3.699432  | -0.642537 | -1.294276 |

**Table S9.** Atomic coordinates for the DFT calculated structure of **28**<sub>SO2</sub>:

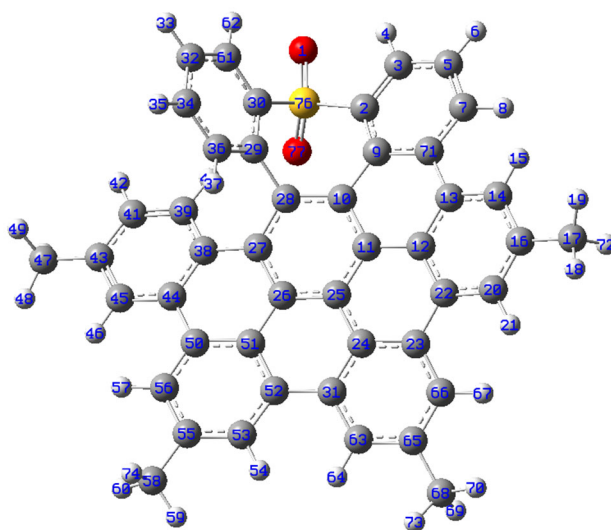

|                                              |                             |
|----------------------------------------------|-----------------------------|
| Zero-point correction=                       | 0.607990 (Hartree/Particle) |
| Thermal correction to Energy=                | 0.644501                    |
| Thermal correction to Enthalpy=              | 0.645446                    |
| Thermal correction to Gibbs Free Energy=     | 0.539032                    |
| Sum of electronic and zero-point Energies=   | -2316.847042                |
| Sum of electronic and thermal Energies=      | -2316.810530                |
| Sum of electronic and thermal Enthalpies=    | -2316.809586                |
| Sum of electronic and thermal Free Energies= | -2316.916000                |

Center    Atomic    Atomic    Coordinates (Angstroms)

| Number | Number | Type | X         | Y         | Z         |
|--------|--------|------|-----------|-----------|-----------|
| 1      | 8      | 0    | 4.416850  | -3.220870 | -1.333528 |
| 2      | 6      | 0    | 1.875010  | -3.363520 | -0.629587 |
| 3      | 6      | 0    | 2.127170  | -4.714517 | -0.780846 |
| 4      | 1      | 0    | 3.112899  | -5.024514 | -1.104047 |
| 5      | 6      | 0    | 1.118096  | -5.637611 | -0.545959 |
| 6      | 1      | 0    | 1.301536  | -6.698580 | -0.673157 |
| 7      | 6      | 0    | -0.130257 | -5.178207 | -0.201610 |
| 8      | 1      | 0    | -0.931805 | -5.896232 | -0.097479 |
| 9      | 6      | 0    | 0.619794  | -2.849211 | -0.201941 |
| 10     | 6      | 0    | 0.295171  | -1.416649 | -0.035130 |
| 11     | 6      | 0    | -1.074100 | -1.032898 | -0.089783 |
| 12     | 6      | 0    | -2.118009 | -2.029451 | 0.024589  |
| 13     | 6      | 0    | -1.785184 | -3.388182 | 0.203565  |
| 14     | 6      | 0    | -2.784728 | -4.302081 | 0.536237  |
| 15     | 1      | 0    | -2.530544 | -5.332803 | 0.749753  |
| 16     | 6      | 0    | -4.117841 | -3.928678 | 0.633927  |
| 17     | 6      | 0    | -5.178526 | -4.937117 | 0.986378  |
| 18     | 1      | 0    | -6.022555 | -4.465969 | 1.495500  |
| 19     | 1      | 0    | -4.783423 | -5.719517 | 1.638812  |
| 20     | 6      | 0    | -4.446993 | -2.606470 | 0.376175  |
| 21     | 1      | 0    | -5.484115 | -2.307991 | 0.469745  |
| 22     | 6      | 0    | -3.479187 | -1.650464 | 0.067808  |
| 23     | 6      | 0    | -3.843997 | -0.254953 | -0.152938 |
| 24     | 6      | 0    | -2.827334 | 0.723418  | -0.138630 |
| 25     | 6      | 0    | -1.436277 | 0.334434  | -0.088857 |
| 26     | 6      | 0    | -0.435446 | 1.330089  | -0.101060 |
| 27     | 6      | 0    | 0.921213  | 0.954761  | -0.029735 |
| 28     | 6      | 0    | 1.256694  | -0.401613 | 0.180784  |
| 29     | 6      | 0    | 2.534685  | -0.684547 | 0.906439  |
| 30     | 6      | 0    | 3.542113  | -1.538157 | 0.469598  |
| 31     | 6      | 0    | -3.190841 | 2.088521  | -0.198913 |
| 32     | 6      | 0    | 4.877574  | -1.142317 | 2.410462  |
| 33     | 1      | 0    | 5.778329  | -1.311709 | 2.990129  |
| 34     | 6      | 0    | 3.883306  | -0.291669 | 2.884939  |
| 35     | 1      | 0    | 4.005634  | 0.202286  | 3.843263  |
| 36     | 6      | 0    | 2.730507  | -0.066329 | 2.146429  |
| 37     | 1      | 0    | 1.965238  | 0.601467  | 2.525230  |
| 38     | 6      | 0    | 1.944404  | 1.996236  | -0.204575 |
| 39     | 6      | 0    | 3.253283  | 1.686254  | -0.620693 |
| 40     | 1      | 0    | 3.500758  | 0.668782  | -0.880483 |
| 41     | 6      | 0    | 4.209952  | 2.661357  | -0.781865 |
| 42     | 1      | 0    | 5.205418  | 2.381973  | -1.114456 |

|    |    |   |           |           |           |
|----|----|---|-----------|-----------|-----------|
| 43 | 6  | 0 | 3.904926  | 4.010259  | -0.557368 |
| 44 | 6  | 0 | 1.600329  | 3.353867  | -0.080617 |
| 45 | 6  | 0 | 2.600166  | 4.329750  | -0.237565 |
| 46 | 1  | 0 | 2.342938  | 5.378138  | -0.148521 |
| 47 | 6  | 0 | 4.959700  | 5.071947  | -0.710895 |
| 48 | 1  | 0 | 4.532161  | 6.074617  | -0.642365 |
| 49 | 1  | 0 | 5.725183  | 4.981669  | 0.066741  |
| 50 | 6  | 0 | 0.196009  | 3.727480  | 0.095383  |
| 51 | 6  | 0 | -0.800340 | 2.730358  | -0.039567 |
| 52 | 6  | 0 | -2.159502 | 3.110709  | -0.030036 |
| 53 | 6  | 0 | -2.493514 | 4.449367  | 0.183814  |
| 54 | 1  | 0 | -3.534369 | 4.743255  | 0.241096  |
| 55 | 6  | 0 | -1.526428 | 5.423148  | 0.379093  |
| 56 | 6  | 0 | -0.190143 | 5.046801  | 0.319725  |
| 57 | 1  | 0 | 0.562692  | 5.812090  | 0.464961  |
| 58 | 6  | 0 | -1.908310 | 6.850163  | 0.670337  |
| 59 | 1  | 0 | -2.945256 | 7.050365  | 0.391930  |
| 60 | 1  | 0 | -1.270688 | 7.551721  | 0.125943  |
| 61 | 6  | 0 | 4.703814  | -1.778210 | 1.190900  |
| 62 | 1  | 0 | 5.444382  | -2.455490 | 0.781536  |
| 63 | 6  | 0 | -4.528520 | 2.427895  | -0.397977 |
| 64 | 1  | 0 | -4.809849 | 3.468783  | -0.502703 |
| 65 | 6  | 0 | -5.524273 | 1.465934  | -0.503893 |
| 66 | 6  | 0 | -5.168344 | 0.133198  | -0.354216 |
| 67 | 1  | 0 | -5.945516 | -0.618237 | -0.427114 |
| 68 | 6  | 0 | -6.948405 | 1.858754  | -0.793694 |
| 69 | 1  | 0 | -7.125212 | 1.925536  | -1.872516 |
| 70 | 1  | 0 | -7.653767 | 1.127659  | -0.391664 |
| 71 | 6  | 0 | -0.405537 | -3.811311 | -0.034443 |
| 72 | 1  | 0 | -5.569962 | -5.426920 | 0.088304  |
| 73 | 1  | 0 | -7.188693 | 2.833906  | -0.363162 |
| 74 | 1  | 0 | -1.803157 | 7.076058  | 1.736763  |
| 75 | 1  | 0 | 5.469747  | 4.986924  | -1.674977 |
| 76 | 16 | 0 | 3.273412  | -2.344533 | -1.072048 |
| 77 | 8  | 0 | 2.878917  | -1.361375 | -2.080150 |

**Table S10.** Major transitions of **5<sub>0</sub>** calculated by TD-DFT.

| Excited state | Energy (eV) | Wavelength (nm) | oscillator strength (f) | Description         | Absolute contributions (%) |
|---------------|-------------|-----------------|-------------------------|---------------------|----------------------------|
| 1             | 2.8601      | 433.49          | 0.0018                  | H-1 -> L -0.54035   | 50.8738                    |
|               |             |                 |                         | H -> L+1 -0.47395   | 44.9257                    |
|               |             |                 |                         | H -> L+2 0.11288    | 2.5484                     |
| 2             | 2.9920      | 414.39          | 0.0206                  | H -> L -0.55660     | 61.9607                    |
|               |             |                 |                         | H-1 -> L+1 0.41803  | 34.9498                    |
| 3             | 3.3572      | 369.31          | 0.3023                  | H-2 -> L -0.13759   | 3.7862                     |
|               |             |                 |                         | H-1 -> L 0.33626    | 22.6142                    |
|               |             |                 |                         | H -> L+1 -0.45290   | 41.0237                    |
|               |             |                 |                         | H -> L+2 -0.38485   | 29.6219                    |
| 4             | 3.3732      | 367.56          | 0.3737                  | H-2 -> L+1 0.13238  | 3.5049                     |
|               |             |                 |                         | H-> L+1 -0.49786    | 49.5729                    |
|               |             |                 |                         | H-1 -> L+2 -0.34070 | 23.2153                    |
|               |             |                 |                         | H -> L -0.32072     | 20.5723                    |
| 5             | 3.5160      | 352.63          | 0.3485                  | H-2 -> L -0.30762   | 18.9260                    |
|               |             |                 |                         | H-1 -> L -0.34011   | 23.1350                    |
|               |             |                 |                         | H -> L+1 0.23953    | 11.4749                    |
|               |             |                 |                         | H -> L+2 -0.45993   | 42.3071                    |
| 6             | 3.5239      | 351.83          | 0.4839                  | H-3 -> L 0.12357    | 3.0539                     |
|               |             |                 |                         | H-2 -> L+1 0.24695  | 12.1969                    |
|               |             |                 |                         | H-1 -> L+1 0.25265  | 12.7664                    |
|               |             |                 |                         | H-1 -> L+2 -0.51700 | 53.4578                    |
|               |             |                 |                         | H -> L 0.27005      | 14.5854                    |
| 7             | 3.7588      | 329.85          | 0.0966                  | H-2 -> L 0.59328    | 70.3962                    |
|               |             |                 |                         | H -> L+2 -0.32259   | 20.8129                    |
| 8             | 3.8022      | 326.08          | 0.1012                  | H-2 -> L+1 0.59372  | 70.5007                    |
|               |             |                 |                         | H-2 -> L+2 -0.12800 | 3.2768                     |
|               |             |                 |                         | H-1 -> L+2 0.28700  | 16.4738                    |
|               |             |                 |                         | H -> L+3 0.11469    | 2.6308                     |
| 9             | 3.8777      | 319.73          | 0.0035                  | H-3 -> L 0.54709    | 59.8615                    |
|               |             |                 |                         | H-2 -> L+1 -0.14570 | 4.2457                     |
|               |             |                 |                         | H-1 -> L+4 0.11823  | 2.7957                     |
|               |             |                 |                         | H -> L+3 0.36976    | 27.3445                    |

**Table S11.** Major transitions of  $17s$  calculated by TD-DFT.

| Excited state | Energy (eV) | Wavelength (nm) | oscillator strength (f) | Description         | Absolute contributions (%) |
|---------------|-------------|-----------------|-------------------------|---------------------|----------------------------|
| 1             | 2.8297      | 438.16          | 0.0106                  | H -> L 0.43418      | 37.7025                    |
|               |             |                 |                         | H -> L+1 0.34076    | 23.2235                    |
|               |             |                 |                         | H-1 -> L -0.31238   | 19.5163                    |
|               |             |                 |                         | H-1 -> L+1 0.28615  | 16.3764                    |
| 2             | 2.9836      | 415.55          | 0.0376                  | H -> L -0.41951     | 35.1977                    |
|               |             |                 |                         | H -> L+1 0.37731    | 28.4726                    |
|               |             |                 |                         | H-1 -> L -0.35677   | 25.4570                    |
|               |             |                 |                         | H-1 -> L+1 -0.20895 | 8.7320                     |
| 3             | 3.3493      | 370.18          | 0.5659                  | H-1 -> L 0.46494    | 43.2338                    |
|               |             |                 |                         | H -> L+1 0.46410    | 43.0778                    |
|               |             |                 |                         | H -> L+2 -0.20888   | 8.7262                     |
| 4             | 3.4011      | 364.54          | 0.5460                  | H-1 -> L+1 -0.58555 | 68.5738                    |
|               |             |                 |                         | H -> L 0.33869      | 22.9422                    |
| 5             | 3.5333      | 350.90          | 0.1367                  | H -> L+2 -0.57740   | 66.6782                    |
|               |             |                 |                         | H-2 -> L -0.22717   | 10.3212                    |
|               |             |                 |                         | H -1-> L -0.20237   | 8.1907                     |
|               |             |                 |                         | H-2 -> L+1 0.16078  | 5.1700                     |
| 6             | 3.6053      | 343.90          | 0.0264                  | H-1 -> L+2 0.44861  | 40.2502                    |
|               |             |                 |                         | H-2 -> L 0.34755    | 24.1582                    |
|               |             |                 |                         | H-3 -> L 0.27993    | 15.6722                    |
|               |             |                 |                         | H-2 -> L+1 0.24642  | 12.1446                    |
| 7             | 3.6992      | 335.17          | 0.0410                  | H-3 -> L 0.47551    | 45.2220                    |
|               |             |                 |                         | H-1 -> L+2 -0.38637 | 29.8564                    |
|               |             |                 |                         | H-2->L 0.23354      | 10.9082                    |
|               |             |                 |                         | H-2->L+1 -0.14617   | 4.2731                     |
| 8             | 3.7862      | 327.46          | 0.0573                  | H-2 -> L 0.46450    | 43.1521                    |
|               |             |                 |                         | H-3 -> L -0.36344   | 26.4177                    |
|               |             |                 |                         | H -> L+2 -0.24211   | 11.7235                    |
|               |             |                 |                         | H -> L+3 -0.20780   | 8.6362                     |
|               |             |                 |                         | H-1->L+2 -0.11944   | 2.8532                     |
|               |             |                 |                         | H-2->L+1 -0.11550   | 2.6681                     |
| 9             | 3.8823      | 319.36          | 0.0103                  | H -> L+3 -0.42474   | 36.0808                    |
|               |             |                 |                         | H-2 -> L+1 -0.35859 | 25.7174                    |
|               |             |                 |                         | H-3 -> L+1 0.21539  | 9.2786                     |
|               |             |                 |                         | H-1-> L+2 0.20796   | 8.6495                     |
|               |             |                 |                         | H-2->L -0.16386     | 5.3700                     |
|               |             |                 |                         | H-3->L 0.16016      | 5.1302                     |

**Table S12.** Major transitions of  $18\text{Se}$  calculated by TD-DFT.

| Excited state     | Energy (eV) | Wavelength (nm) | oscillator strength (f) | Description        | Absolute contributions (%) |
|-------------------|-------------|-----------------|-------------------------|--------------------|----------------------------|
| 1                 | 2.8322      | 437.77          | 0.0101                  | H -> L 0.43764     | 38.3058                    |
|                   |             |                 |                         | H -> L+1 0.34064   | 23.2071                    |
|                   |             |                 |                         | H-1 -> L -0.30468  | 18.5660                    |
|                   |             |                 |                         | H-1 -> L+1 0.28841 | 16.6361                    |
| 2                 | 2.9864      | 415.16          | 0.0368                  | H -> L 0.41533     | 34.4998                    |
|                   |             |                 |                         | H -> L+1 -0.38914  | 30.2860                    |
|                   |             |                 |                         | H-1 -> L 0.35080   | 24.6121                    |
|                   |             |                 |                         | H-1 -> L+1 0.20597 | 8.4847                     |
| 3                 | 3.3510      | 369.99          | 0.5585                  | H-1 -> L 0.47176   | 44.5115                    |
|                   |             |                 |                         | H -> L+1 0.45741   | 41.8448                    |
|                   |             |                 |                         | H -> L+2 -0.21970  | 9.6536                     |
| 4                 | 3.3980      | 364.88          | 0.5108                  | H-1 -> L+1 0.57424 | 65.9503                    |
|                   |             |                 |                         | H -> L -0.32838    | 21.5667                    |
|                   |             |                 |                         | H-2->L -0.14321    | 4.1018                     |
| 5                 | 3.5061      | 353.62          | 0.0847                  | H-2 -> L 0.54240   | 58.8396                    |
|                   |             |                 |                         | H -> L+2 0.36796   | 27.0789                    |
|                   |             |                 |                         | H-1 -> L 0.14660   | 4.2983                     |
| 6                 | 3.5478      | 349.47          | 0.0986                  | H -> L+2 0.46202   | 42.6925                    |
|                   |             |                 |                         | H-2 -> L -0.31776  | 20.1943                    |
|                   |             |                 |                         | H-3 -> L -0.26933  | 14.5077                    |
|                   |             |                 |                         | H-1 -> L 0.15122   | 4.5735                     |
|                   |             |                 |                         | H-3->L+1 0.13545   | 3.6693                     |
|                   |             |                 |                         | H-1->L+1 -0.13478  | 3.6331                     |
| H-2->L+1 -0.12501 | 3.1255      |                 |                         |                    |                            |
| 7                 | 3.6361      | 340.98          | 0.0385                  | H-1 -> L+2 0.56351 | 63.5087                    |
|                   |             |                 |                         | H-2 -> L+1 0.25518 | 13.0234                    |
|                   |             |                 |                         | H-3->L -0.22946    | 10.5304                    |
|                   |             |                 |                         | H-3->L+1 -0.14411  | 4.1535                     |
| 8                 | 3.7745      | 328.48          | 0.0204                  | H-2 -> L+1 0.50610 | 51.2274                    |
|                   |             |                 |                         | H-3 -> L 0.31648   | 20.0319                    |
|                   |             |                 |                         | H -> L+2 0.17963   | 6.4534                     |
|                   |             |                 |                         | H-3 -> L+1 0.16233 | 5.2702                     |
|                   |             |                 |                         | H-2->L -0.15193    | 4.6165                     |
|                   |             |                 |                         | H-2->L+2 0.14041   | 3.9430                     |



|   |        |        |        |            |          |         |
|---|--------|--------|--------|------------|----------|---------|
|   |        |        |        | H -> L+3   | 0.13666  | 3.7352  |
| 9 | 3.7964 | 326.58 | 0.0619 | H-3 -> L   | 0.43725  | 38.2375 |
|   |        |        |        | H-2 -> L+1 | -0.28803 | 16.5923 |
|   |        |        |        | H-3 -> L+1 | -0.27402 | 15.0174 |
|   |        |        |        | H-1-> L+2  | 0.21483  | 9.2304  |
|   |        |        |        | H->L+2     | -0.17589 | 6.1875  |
|   |        |        |        | H->L+2     | 0.15450  | 4.7740  |
|   |        |        |        | H->L+3     | 0.14336  | 4.1104  |

**Table S13.** Major transitions of **24<sub>SO</sub>** calculated by TD-DFT.

| Excited state | Energy (eV) | Wavelength (nm) | oscillator strength (f) | Description         | Absolute contributions (%) |
|---------------|-------------|-----------------|-------------------------|---------------------|----------------------------|
| 1             | 2.8313      | 437.91          | 0.0227                  | H -> L 0.46731      | 43.6757                    |
|               |             |                 |                         | H -> L+1 -0.30437   | 18.5282                    |
|               |             |                 |                         | H-1 -> L 0.30282    | 18.3400                    |
|               |             |                 |                         | H-1 -> L+1 0.28743  | 16.5232                    |
| 2             | 2.9830      | 415.63          | 0.0412                  | H-1-> L 0.40234     | 32.3755                    |
|               |             |                 |                         | H -> L -0.39600     | 31.3632                    |
|               |             |                 |                         | H -> L+1 -0.37105   | 27.5356                    |
|               |             |                 |                         | H-1 -> L+1 -0.18040 | 6.5088                     |
| 3             | 3.3705      | 367.85          | 0.5913                  | H -> L+1 0.48892    | 47.8086                    |
|               |             |                 |                         | H-1-> L 0.44924     | 40.3633                    |
|               |             |                 |                         | H -> L+2 -0.16407   | 5.3838                     |
| 4             | 3.4179      | 362.75          | 0.5908                  | H-1 -> L+1 0.59154  | 69.9839                    |
|               |             |                 |                         | H -> L -0.32355     | 20.9369                    |
|               |             |                 |                         | H->L+1 0.10803      | 2.3341                     |
| 5             | 3.5452      | 349.72          | 0.0634                  | H -> L+2 0.53428    | 57.0910                    |
|               |             |                 |                         | H-2 -> L 0.34485    | 23.7843                    |
|               |             |                 |                         | H-2-> L+1 0.16929   | 5.7318                     |
|               |             |                 |                         | H-1 -> L 0.15720    | 4.9424                     |
| 6             | 3.6360      | 340.99          | 0.0199                  | H-2 -> L+2 0.48352  | 46.7583                    |
|               |             |                 |                         | H-2 -> L -0.31204   | 19.4738                    |
|               |             |                 |                         | H-2 -> L+1 0.28773  | 16.5577                    |
|               |             |                 |                         | H-3 ->L -0.16867    | 5.6899                     |
|               |             |                 |                         | H-1 ->L+2 0.15240   | 4.6452                     |
| 7             | 3.7389      | 331.60          | 0.0307                  | H-3 -> L 0.63994    | 81.9046                    |
|               |             |                 |                         | H-2 -> L -0.18368   | 6.7477                     |
|               |             |                 |                         | H->L+2 0.15599      | 4.8666                     |

|   |        |        |        |            |          |         |
|---|--------|--------|--------|------------|----------|---------|
| 8 | 3.7667 | 329.15 | 0.0790 | H-2 -> L   | 0.46068  | 42.4452 |
|   |        |        |        | H-1 -> L+2 | 0.36643  | 26.8542 |
|   |        |        |        | H -> L+2   | -0.26065 | 13.5877 |
|   |        |        |        | H-3 -> L   | 0.18400  | 6.7712  |
|   |        |        |        | H-2->L+1   | 0.11019  | 2.4284  |
| 9 | 3.8859 | 319.06 | 0.0135 | H-2 -> L+1 | 0.41712  | 34.7978 |
|   |        |        |        | H -> L+3   | 0.41710  | 34.7945 |
|   |        |        |        | H-1 -> L+2 | -0.23121 | 10.6916 |
|   |        |        |        | H-3-> L+1  | -0.15263 | 4.6592  |
|   |        |        |        | H->L+2     | -0.13612 | 3.7057  |
|   |        |        |        | H-2->L     | -0.10677 | 2.2800  |

**Table S14.** Major transitions of  $26\text{SeO}$  calculated by TD-DFT.

| Excited state | Energy (eV) | Wavelength (nm) | oscillator strength (f) | Description | Absolute contributions (%) |         |
|---------------|-------------|-----------------|-------------------------|-------------|----------------------------|---------|
| 1             | 3.0872      | 401.60          | 0.0174                  | H -> L      | 0.40827                    | 33.3369 |
|               |             |                 |                         | H-1 -> L    | 0.35754                    | 25.5670 |
|               |             |                 |                         | H -> L+1    | 0.34431                    | 23.7099 |
|               |             |                 |                         | H-1 -> L+1  | -0.26164                   | 13.6911 |
| 2             | 3.2257      | 384.36          | 0.0392                  | H-> L       | 0.44343                    | 39.3260 |
|               |             |                 |                         | H-1 -> L    | -0.36473                   | 26.6056 |
|               |             |                 |                         | H -> L+1    | -0.31913                   | 20.3688 |
|               |             |                 |                         | H-1 -> L+1  | -0.23452                   | 10.9999 |
| 3             | 3.5945      | 344.93          | 0.4666                  | H -> L+1    | 0.48325                    | 46.7061 |
|               |             |                 |                         | H-1-> L     | -0.40153                   | 32.2453 |
|               |             |                 |                         | H -> L+2    | -0.25713                   | 13.2232 |
| 4             | 3.6372      | 340.88          | 0.5908                  | H-1 -> L+1  | 0.57746                    | 66.6920 |
|               |             |                 |                         | H -> L      | 0.32958                    | 21.7246 |
|               |             |                 |                         | H->L+2      | -0.12567                   | 3.1586  |
| 5             | 3.6986      | 335.22          | 0.1385                  | H -> L+2    | 0.48054                    | 46.1837 |
|               |             |                 |                         | H-2 -> L    | -0.35754                   | 25.5670 |
|               |             |                 |                         | H-1-> L     | -0.23385                   | 10.9372 |
|               |             |                 |                         | H -> L+1    | 0.14890                    | 4.4342  |
|               |             |                 |                         | H-2 -> L+1  | 0.12405                    | 3.0777  |
|               |             |                 |                         | H-1 -> L+2  | -0.10935                   | 2.3915  |
| H-1 -> L+1    | 0.10083     | 2.0333          |                         |             |                            |         |

|   |        |        |        |            |          |         |
|---|--------|--------|--------|------------|----------|---------|
| 6 | 3.7754 | 328.40 | 0.0675 | H-1 -> L+2 | 0.50997  | 52.0139 |
|   |        |        |        | H-2 -> L+1 | 0.31345  | 19.6502 |
|   |        |        |        | H-2 -> L   | 0.24881  | 12.3813 |
|   |        |        |        | H ->L+2    | 0.14260  | 4.0670  |
| 7 | 3.8968 | 318.17 | 0.0859 | H-2 -> L   | 0.50890  | 51.7958 |
|   |        |        |        | H -> L+2   | 0.30815  | 18.9913 |
|   |        |        |        | H-1->L+2   | -0.30295 | 18.3557 |
|   |        |        |        | H-3->L     | -0.13373 | 3.5767  |
| 8 | 3.9601 | 313.09 | 0.0155 | H-3 -> L   | 0.66651  | 88.8471 |
|   |        |        |        | H-1 -> L+2 | -0.10569 | 2.2341  |
|   |        |        |        | H-2 -> L   | 0.10284  | 2.1152  |
| 9 | 4.0232 | 308.18 | 0.0164 | H-2 -> L+1 | 0.45155  | 40.7795 |
|   |        |        |        | H -> L+3   | 0.38027  | 28.9211 |
|   |        |        |        | H-1 -> L+2 | -0.23053 | 10.6288 |
|   |        |        |        | H->L+2     | -0.15322 | 4.6953  |
|   |        |        |        | H-4->L     | -0.10159 | 2.0641  |

**Table S15.** Major transitions of **28**<sub>SO2</sub> calculated by TD-DFT.

| Excited state | Energy (eV) | Wavelength (nm) | oscillator strength (f) | Description | Absolute contributions (%) |         |
|---------------|-------------|-----------------|-------------------------|-------------|----------------------------|---------|
| 1             | 3.0411      | 407.70          | 0.0060                  | H -> L      | 0.46858                    | 43.9134 |
|               |             |                 |                         | H-1 -> L+1  | -0.32377                   | 20.9654 |
|               |             |                 |                         | H -> L+1    | 0.31246                    | 19.5263 |
|               |             |                 |                         | H-1 -> L    | 0.24932                    | 12.4321 |
| 2             | 3.1739      | 390.63          | 0.0256                  | H-> L+1     | 0.44572                    | 39.7333 |
|               |             |                 |                         | H-1 -> L    | 0.35724                    | 25.5241 |
|               |             |                 |                         | H -> L      | -0.35364                   | 25.0122 |
|               |             |                 |                         | H-1 -> L+1  | 0.19947                    | 7.9577  |
| 3             | 3.4998      | 354.26          | 0.3356                  | H -> L+2    | 0.42619                    | 36.3276 |
|               |             |                 |                         | H-1-> L     | 0.35168                    | 24.7358 |
|               |             |                 |                         | H-1 -> L+1  | 0.25548                    | 13.0540 |
|               |             |                 |                         | H -> L+1    | -0.24947                   | 12.4471 |
|               |             |                 |                         | H -> L      | 0.16998                    | 5.7786  |
|               |             |                 |                         | H-1 -> L+2  | -0.10759                   | 2.3151  |
| 4             | 3.5478      | 349.47          | 0.3965                  | H-1 -> L+1  | 0.46203                    | 42.6943 |
|               |             |                 |                         | H -> L      | 0.29519                    | 17.4274 |
|               |             |                 |                         | H-1->L      | -0.26081                   | 13.6044 |
|               |             |                 |                         | H->L+1      | 0.23369                    | 10.9222 |
|               |             |                 |                         | H-1->L+2    | -0.19133                   | 7.3214  |

|   |        |        |        |            |          |         |
|---|--------|--------|--------|------------|----------|---------|
| 5 | 3.5636 | 347.92 | 0.3792 | H-1 -> L+2 | 0.51983  | 54.0446 |
|   |        |        |        | H-1 -> L   | -0.30288 | 18.3473 |
|   |        |        |        | H -> L+1   | 0.26901  | 14.4733 |
|   |        |        |        | H-1 -> L+1 | -0.13227 | 3.4991  |
| 6 | 3.6649 | 338.30 | 0.0846 | H-1 -> L+2 | 0.59949  | 71.8777 |
|   |        |        |        | H-1 -> L+1 | 0.18537  | 6.8724  |
|   |        |        |        | H-2 -> L+1 | -0.16081 | 5.1720  |
|   |        |        |        | H-2 ->L    | -0.15218 | 4.6318  |
|   |        |        |        | H ->L      | 0.13725  | 3.7675  |
| 7 | 3.8100 | 325.42 | 0.0134 | H-2 -> L   | 0.57288  | 65.6383 |
|   |        |        |        | H-2 -> L+1 | -0.25548 | 13.0540 |
|   |        |        |        | H->L+3     | -0.23035 | 10.6122 |
|   |        |        |        | H->L+2     | -0.12609 | 3.1797  |
| 8 | 3.8644 | 320.84 | 0.0046 | H-2 -> L+1 | 0.51163  | 52.3531 |
|   |        |        |        | H-2 -> L   | 0.30149  | 18.1792 |
|   |        |        |        | H-1 -> L+2 | 0.23052  | 10.6279 |
|   |        |        |        | H -> L+3   | 0.22085  | 9.7549  |
|   |        |        |        | H-1 -> L+3 | 0.11247  | 2.5299  |
| 9 | 4.0916 | 303.02 | 0.1773 | H -> L+3   | 0.50956  | 51.9303 |
|   |        |        |        | H -> L+4   | -0.24641 | 12.1436 |
|   |        |        |        | H-2 -> L+1 | -0.23504 | 11.0488 |
|   |        |        |        | H-1->L+3   | -0.20455 | 8.3681  |
|   |        |        |        | H-3->L     | 0.11872  | 2.8189  |
|   |        |        |        | H-2->L     | 0.10940  | 2.3937  |
|   |        |        |        | H-1->L+4   | 0.10241  | 2.0976  |

---

## Reference:

- [S1] Jia, X. et al, Design and Applications of a SO<sub>2</sub> Surrogate in Palladium-Catalyzed Direct Aminosulfonylation between Aryl Iodides and Amines. *Angew. Chem. Int. Ed.* **2021**, *60*, 7353.
- [S2] Taniguchi, N., Diarylation of Chalcogen Elements using Arylboronic acids via Copper- or Palladium-catalyzed Oxidative Coupling. *Tetrahedron* **2016**, *72*, 5818.
- [S3] Janosik, T. et al, A New Concise Strategy for Synthesis of Dibenzo[b,f]thiepins and Related Fused Symmetrical Thiepin Derivatives. *J. Org. Chem.* **2007**, *72*, 8984.
- [S4] Bertozzi, C. R. et al, Synthesis and Reactivity of Dibenzoselenacycloheptynes. *Org. Lett.* **2013**, *15*, 3038.
- [S5] Gilheany, D. G. et al, Co-operative ortho-effects on the Wittig reaction. Interpretation of Stereoselectivity in the Reaction of Ortho-halo-substituted Benzaldehydes and Benzyliidenetriphenylphosphoranes. *Tetrahedron Lett.* **2002**, *43*, 2449.
- [S6] R. H. Martin et al, Thermal Racemisation of Hepta-, Octa-, and Nonahelicene: Kinetic Results, Reaction Path and Experimental Proofs that the Racemisation of Hexa- and Heptahelicene Does not Involve an Intramolecular Double Diels-Alder Reaction. *Tetrahedron* **1974**, *30*, 347.
- [S7] T. B. J. Hall, B. R. Hoggard, C. B. Larsen, N. T. Lucas, *Chem.-Asian J.* **2019**, *14*, 1106
- [S8] M. J. Frisch, G. W. Trucks, H. B. Schlegel, G. E. Scuseria, M. A. Robb, J. R. Cheeseman, G. Scalmani, V. Barone, B. Mennucci, G. A. Petersson, H. Nakatsuji, M. Caricato, X. Li, H. P. Hratchian, A. F. Izmaylov, J. Bloino, G. Zheng, J. L. Sonnenberg, M. Hada, M. Ehara, K. Toyota, R. Fukuda, J. Hasegawa, M. Ishida, T. Nakajima, Y. Honda, O. Kitao, H. Nakai, T. Vreven, J. A. Montgomery, Jr., J. E. Peralta, F. Ogliaro, M. Bearpark, J. J. Heyd, E. Brothers, K. N. Kudin, V. N. Staroverov, T. Keith, R. Kobayashi, J. Normand, K. Raghavachari, A. Rendell, J. C. Burant, S. S. Iyengar, J. Tomasi, M. Cossi, N. Rega, J. M. Millam, M. Klene, J. E. Knox, J. B. Cross, V. Bakken, C. Adamo, J. Jaramillo, R. Gomperts, R. E. Stratmann, O. Yazyev, A. J. Austin, R. Cammi, C. Pomelli, J. W. Ochterski, R. L. Martin, K. Morokuma, V. G. Zakrzewski, G. A. Voth, P. Salvador, J. J. Dannenberg, S. Dapprich, A. D. Daniels, O. Farkas, J. B. Foresman, J. V. Ortiz, J. Cioslowski, D. J. Fox, Gaussian 16, Gaussian, Inc., Wallingford CT, **2016**

# Spectra ( $^1\text{H}$ NMR and $^{13}\text{C}$ NMR)

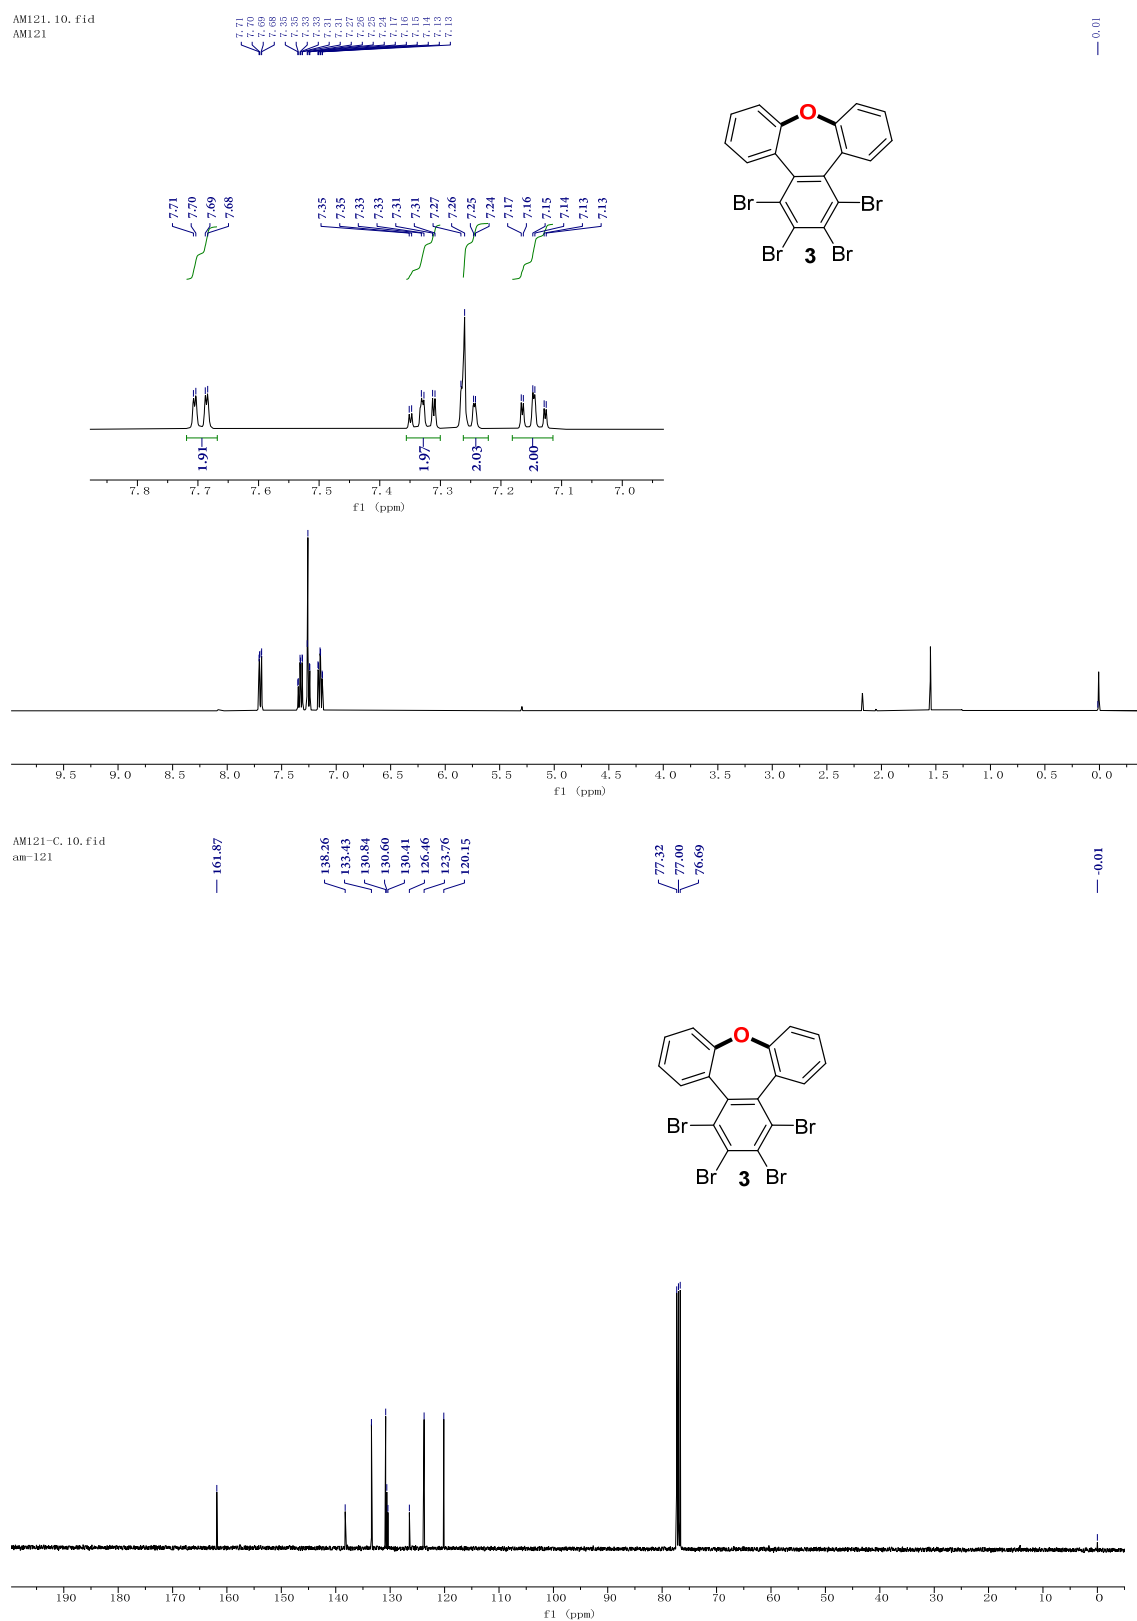

Figure S29.  $^1\text{H}$  NMR (up) and  $^{13}\text{C}$  NMR (down) of **3** in  $\text{CDCl}_3$ .

am-116.10.fid  
am-116

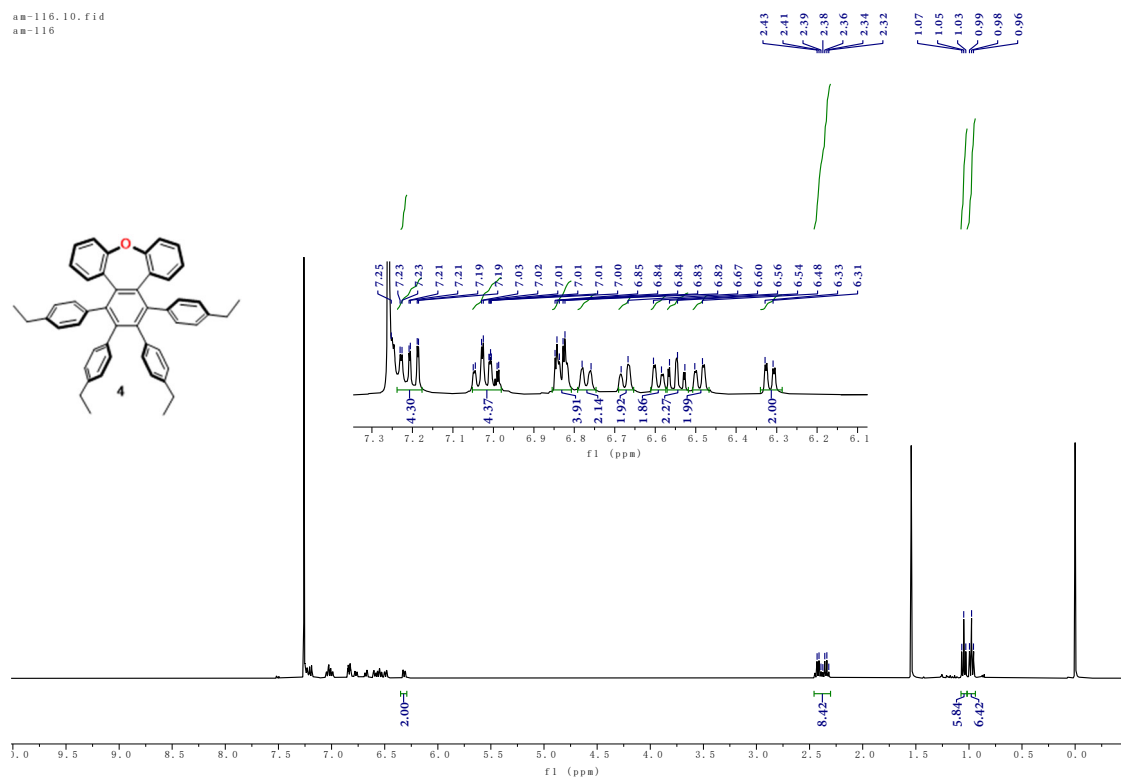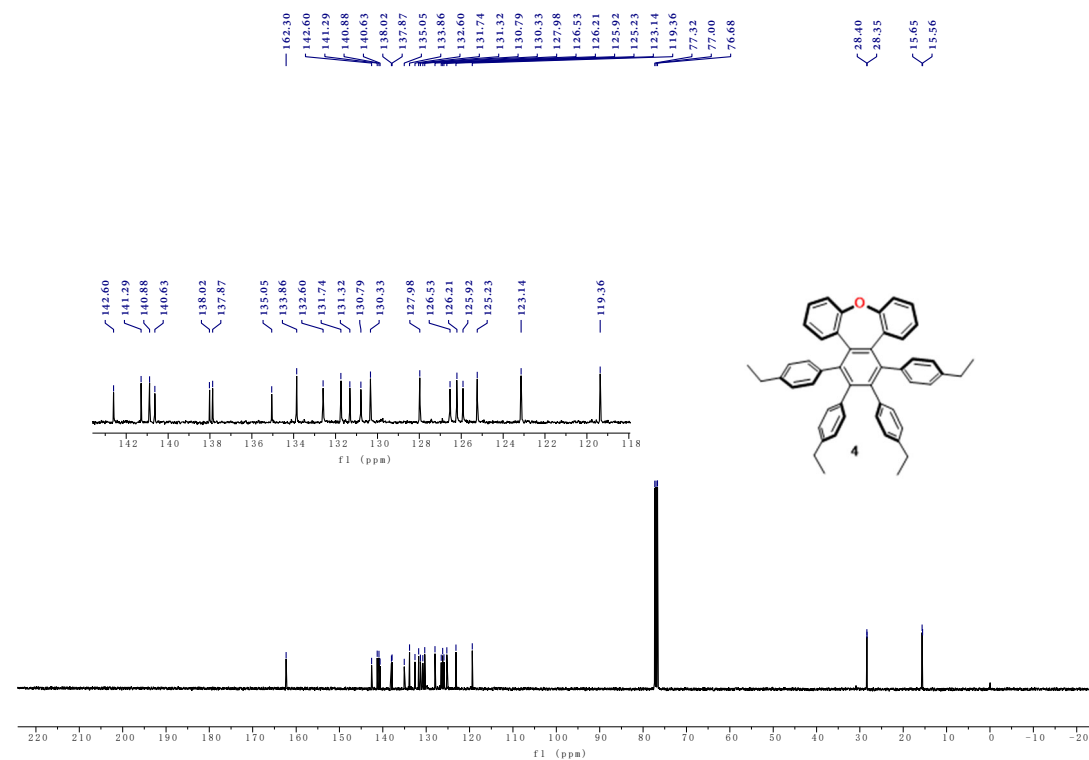

Figure S30.  $^1\text{H NMR}$  (up) and  $^{13}\text{C NMR}$  (down) of 4 in  $\text{CDCl}_3$ .

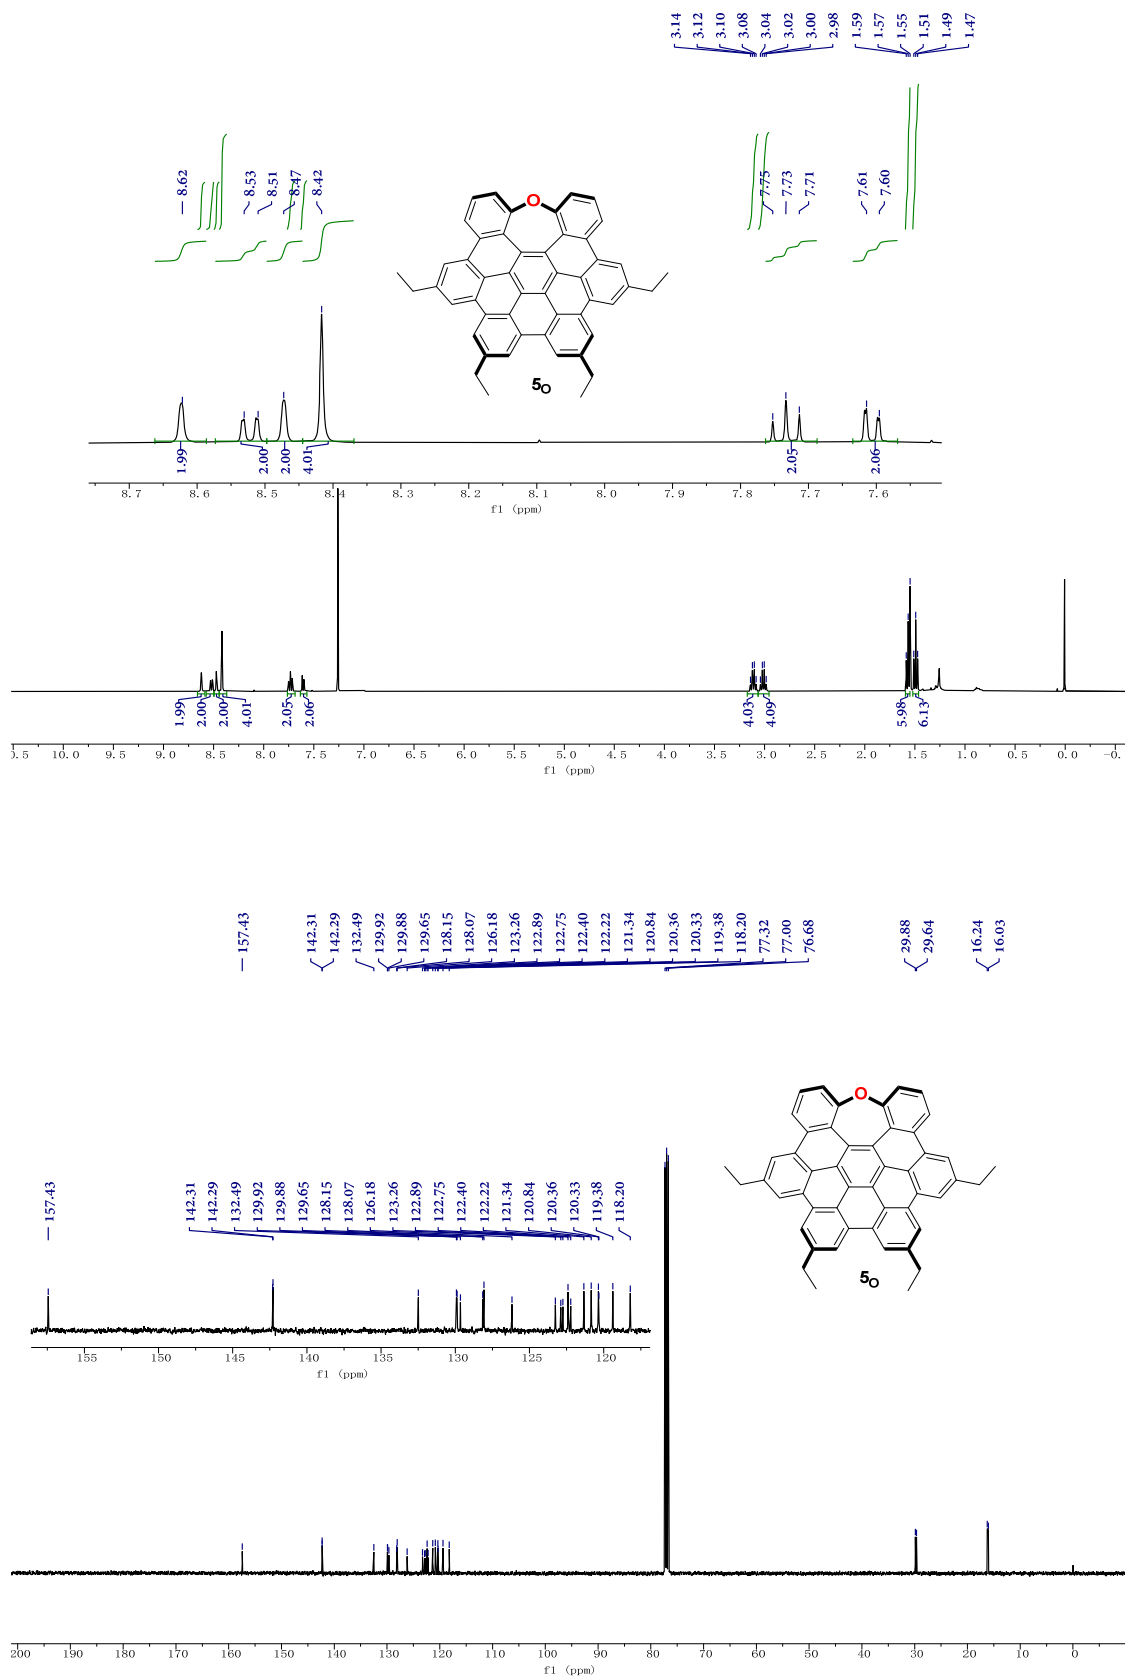

**Figure S31.** <sup>1</sup>H NMR (up) and <sup>13</sup>C NMR (down) of 5<sub>o</sub> in CDCl<sub>3</sub>.



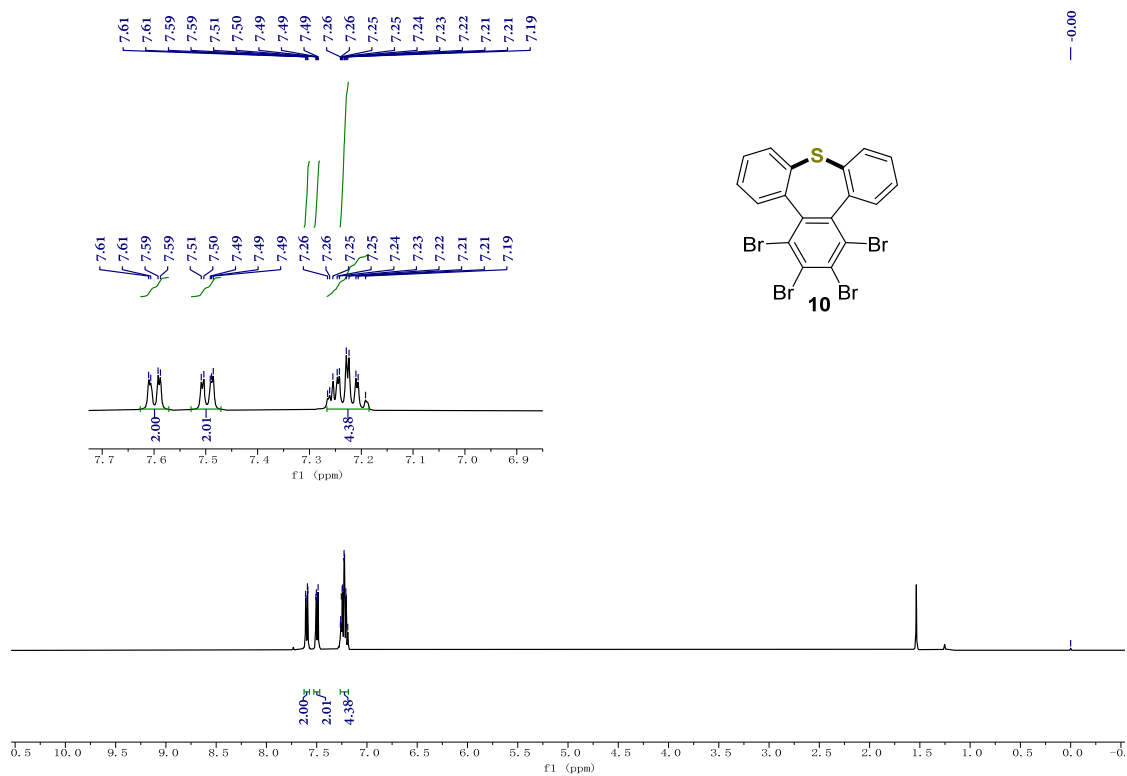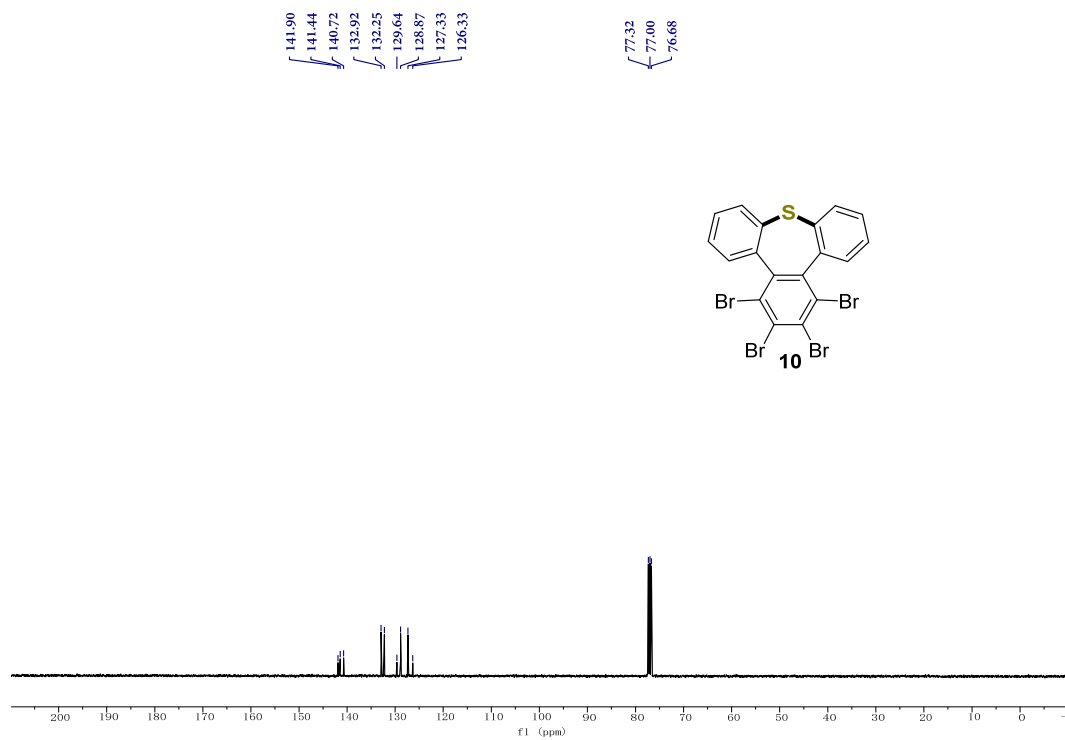

Figure S32. <sup>1</sup>H NMR (up) and <sup>13</sup>C NMR (down) of **10** in CDCl<sub>3</sub>.

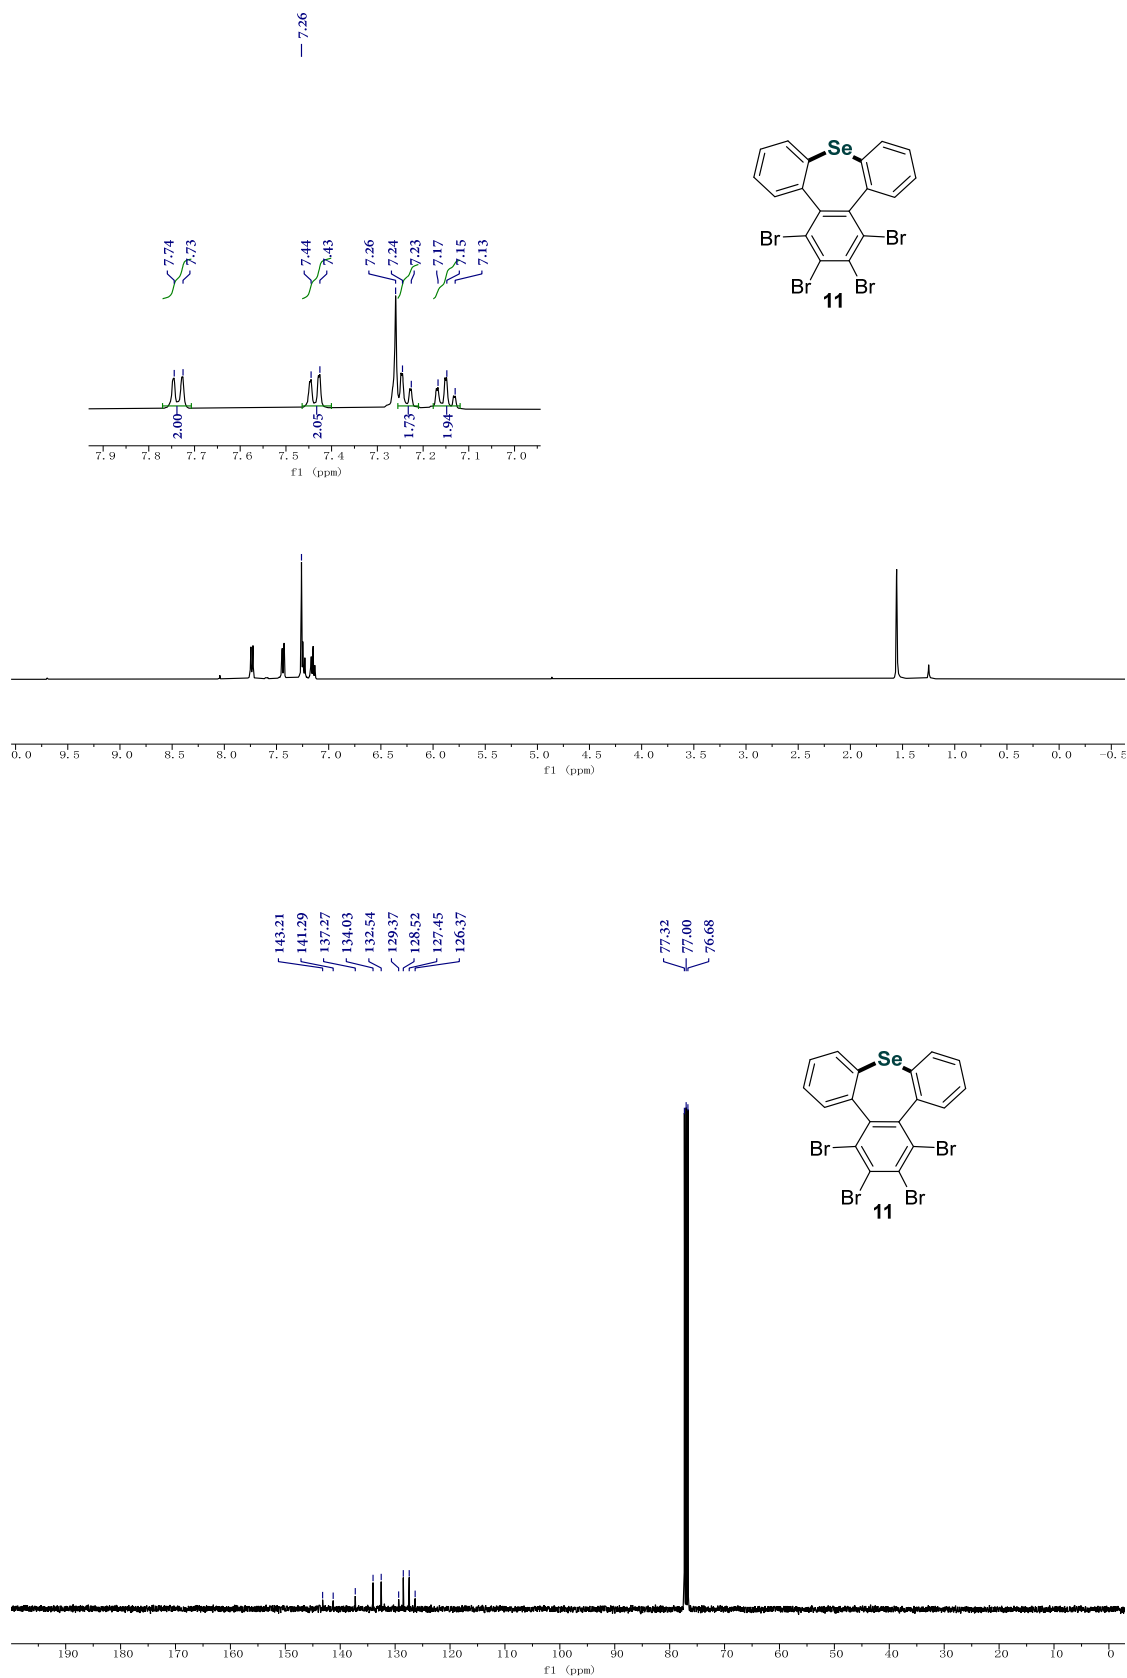

**Figure S33.** <sup>1</sup>H NMR (up) and <sup>13</sup>C NMR (down) of **11** in CDCl<sub>3</sub>.

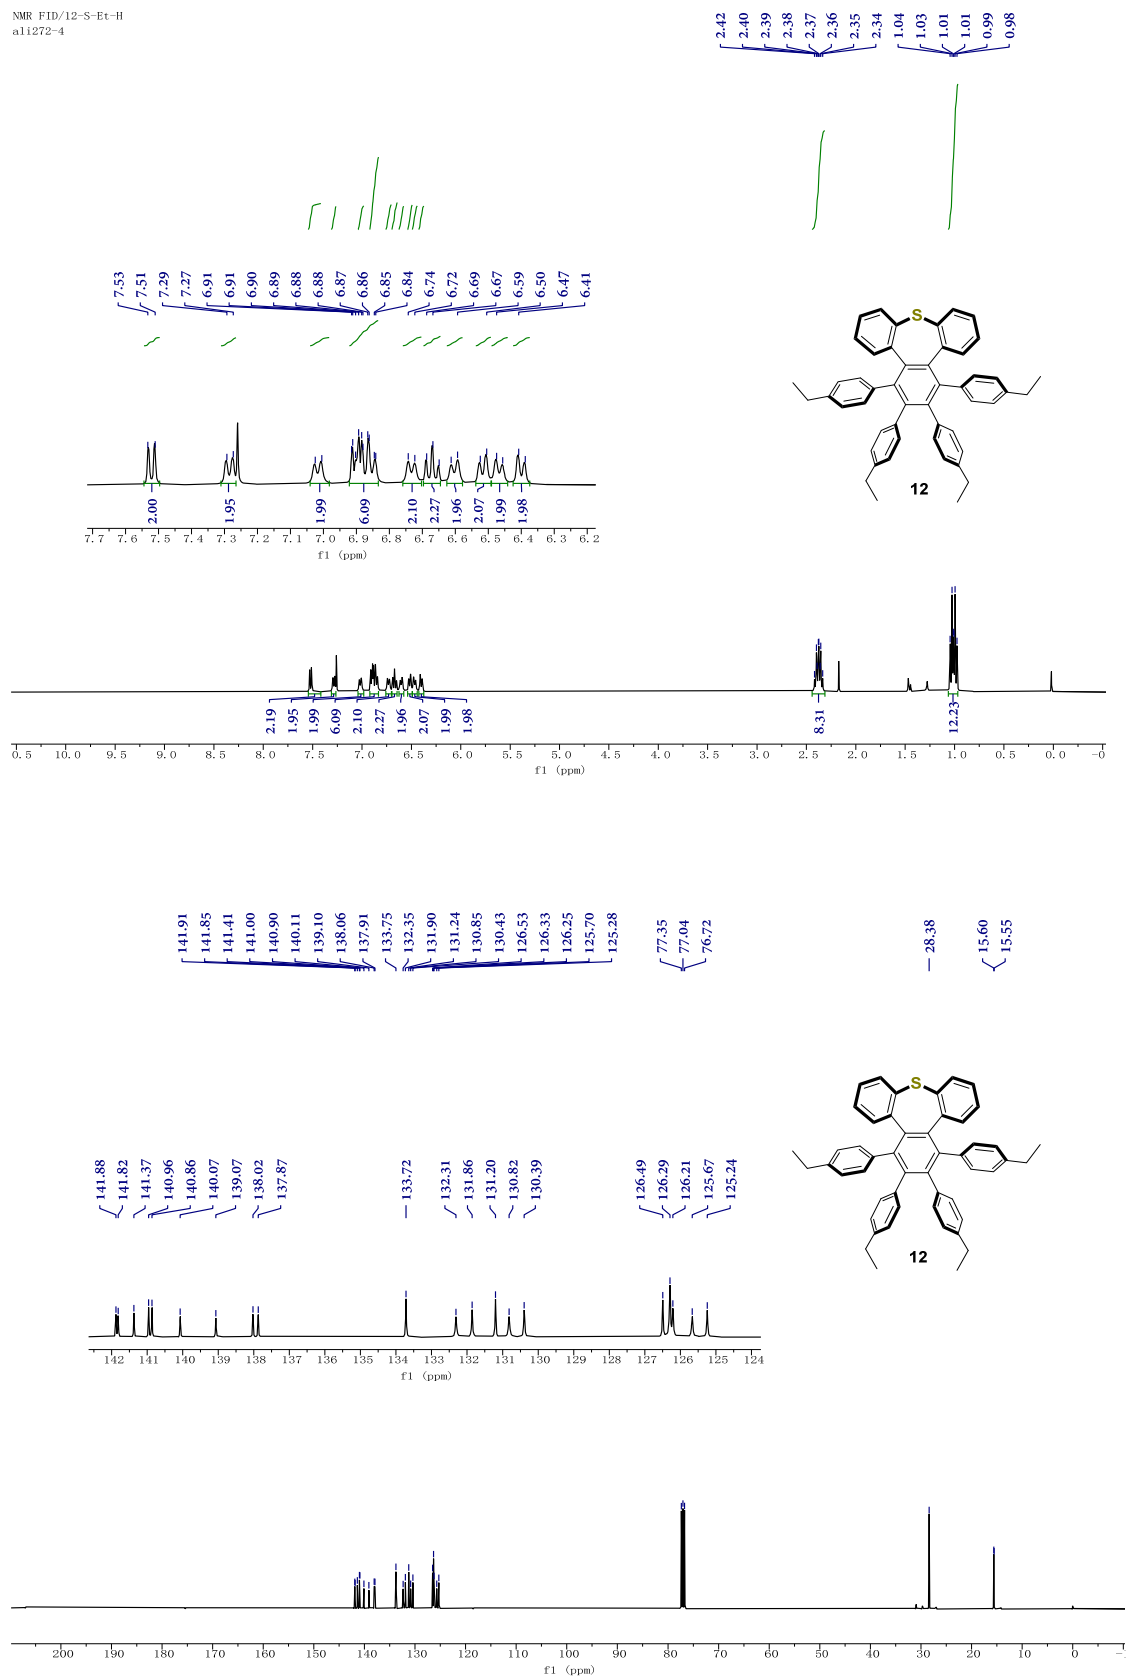

Figure S34. <sup>1</sup>H NMR (up) and <sup>13</sup>C NMR (down) of **12** in CDCl<sub>3</sub>.



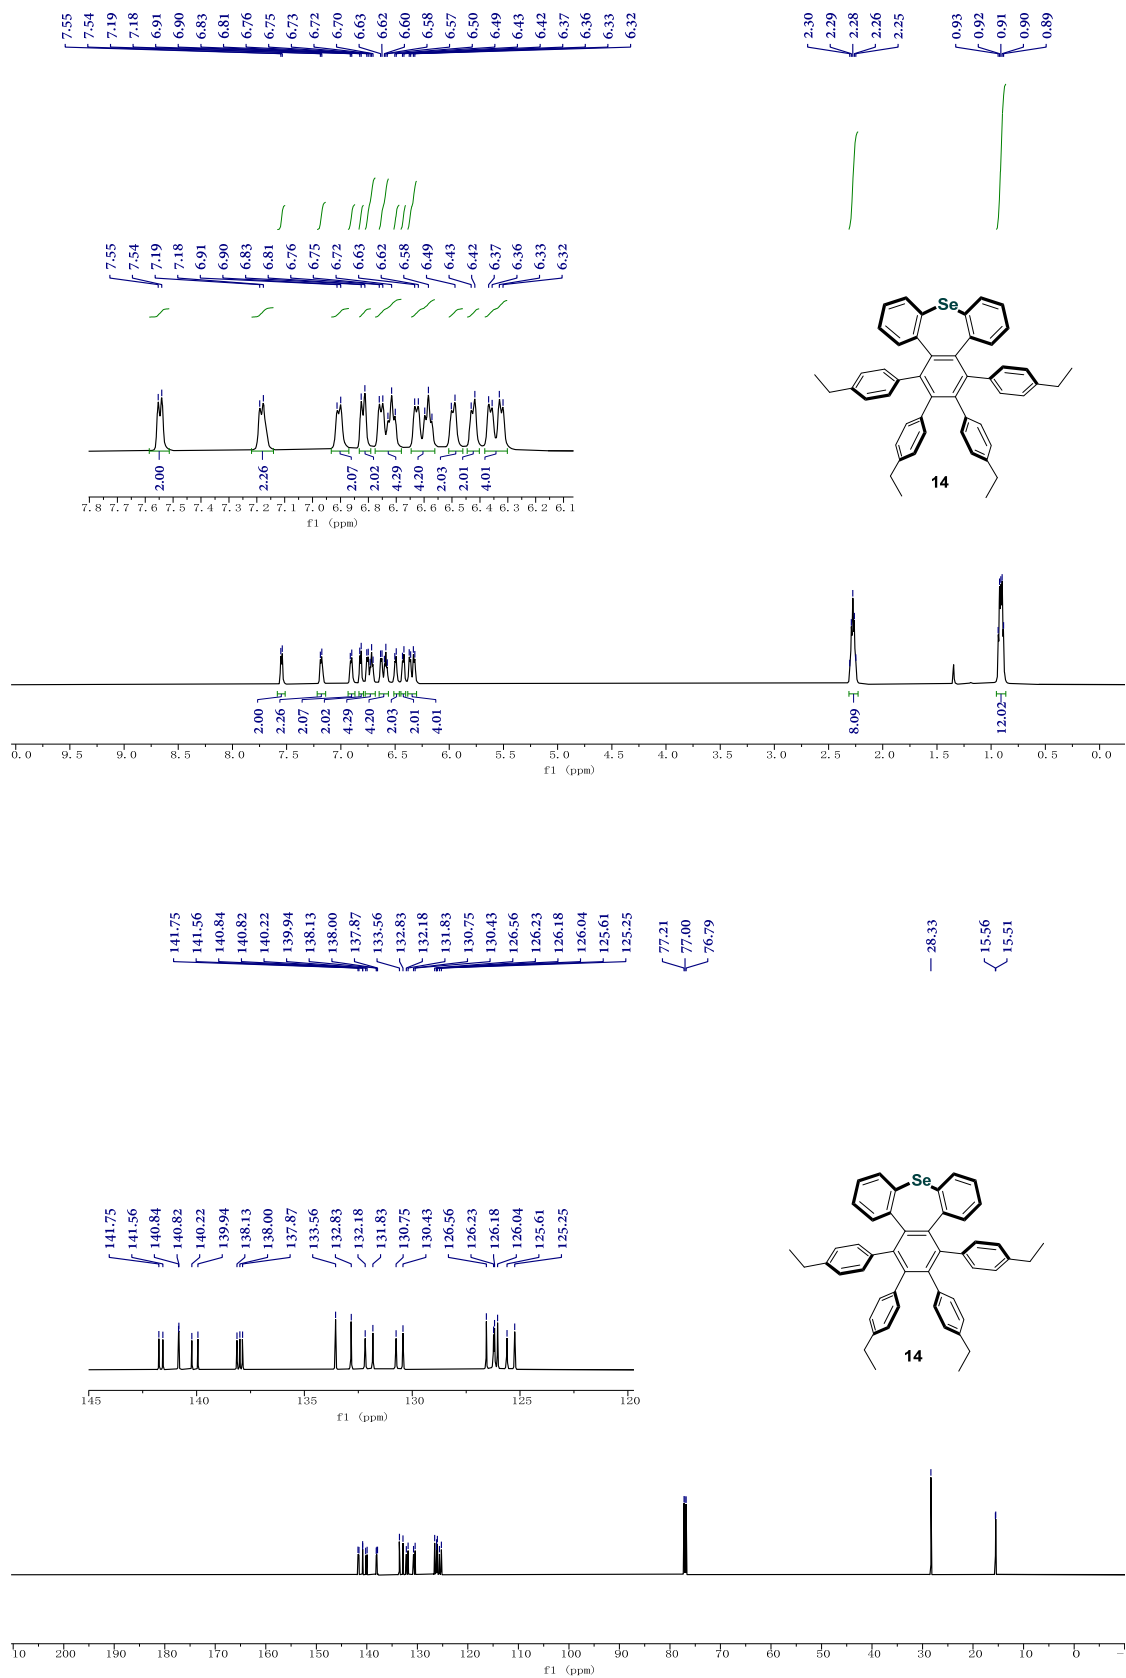

**Figure S36.** <sup>1</sup>H NMR (up) and <sup>13</sup>C NMR (down) of **14** in CDCl<sub>3</sub>.

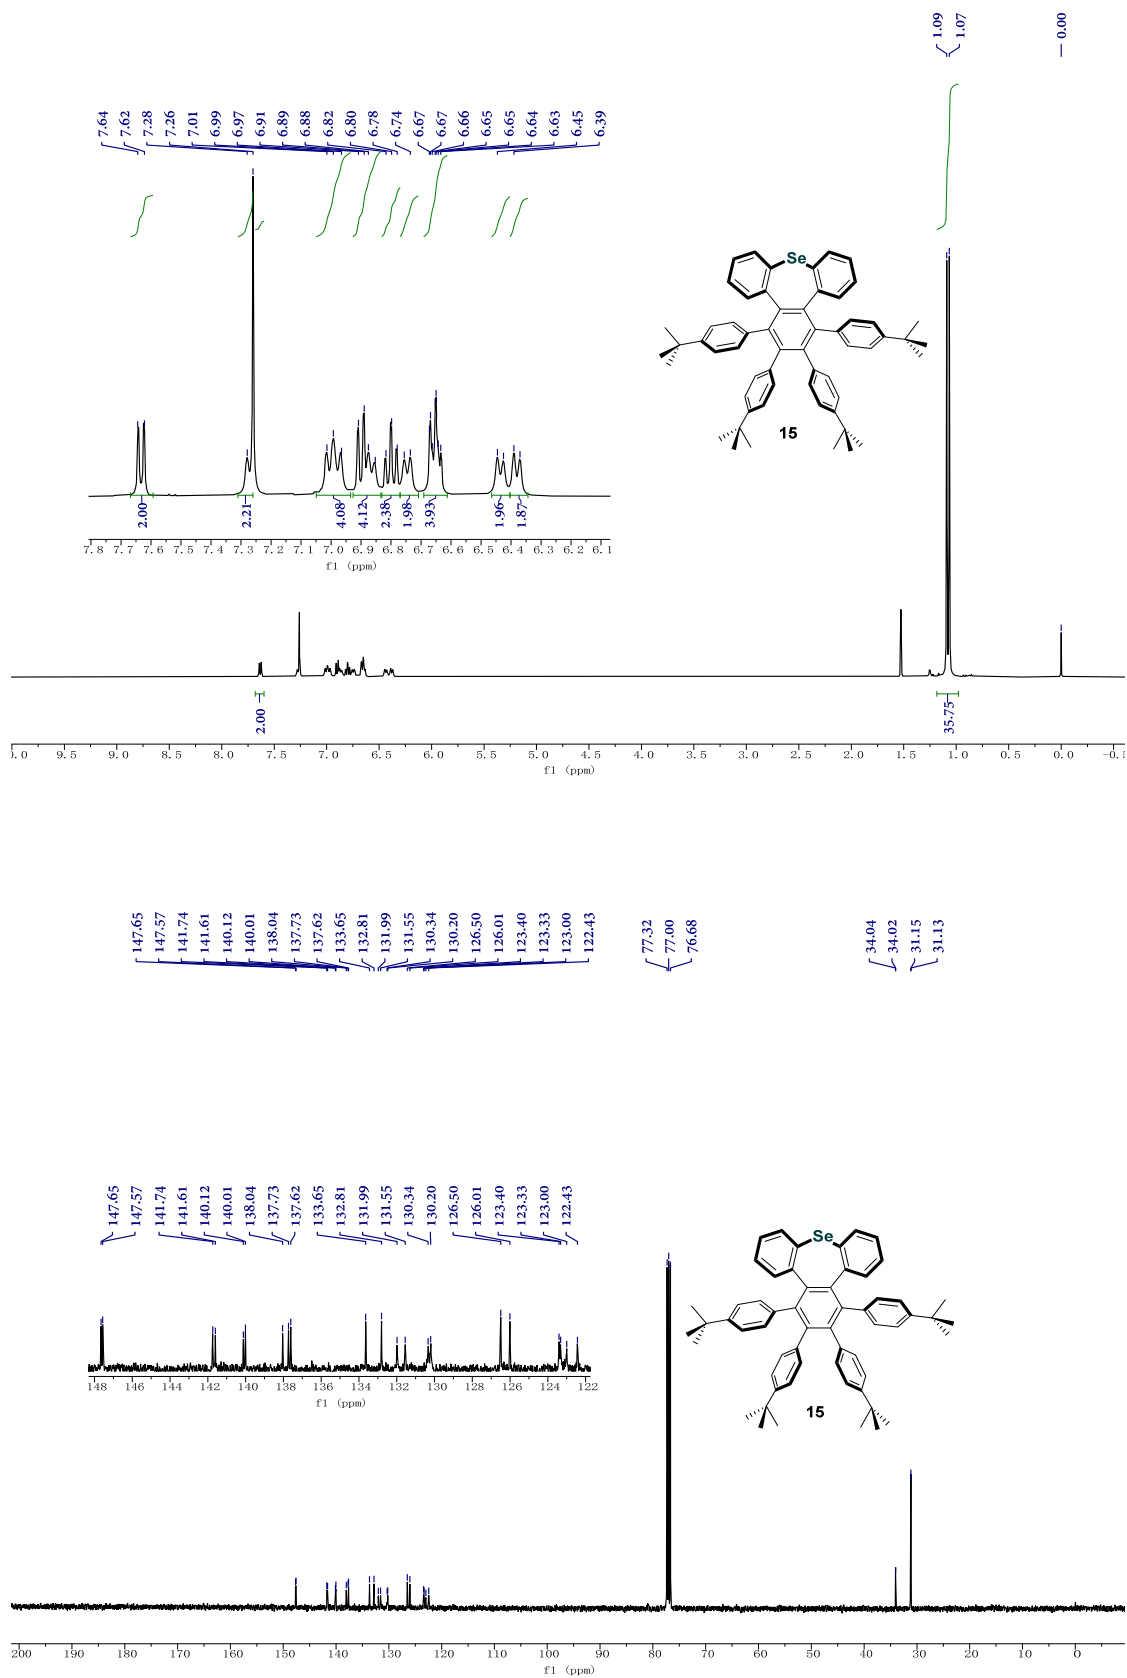

**Figure S37.** <sup>1</sup>H NMR (up) and <sup>13</sup>C NMR (down) of 15 in CDCl<sub>3</sub>.

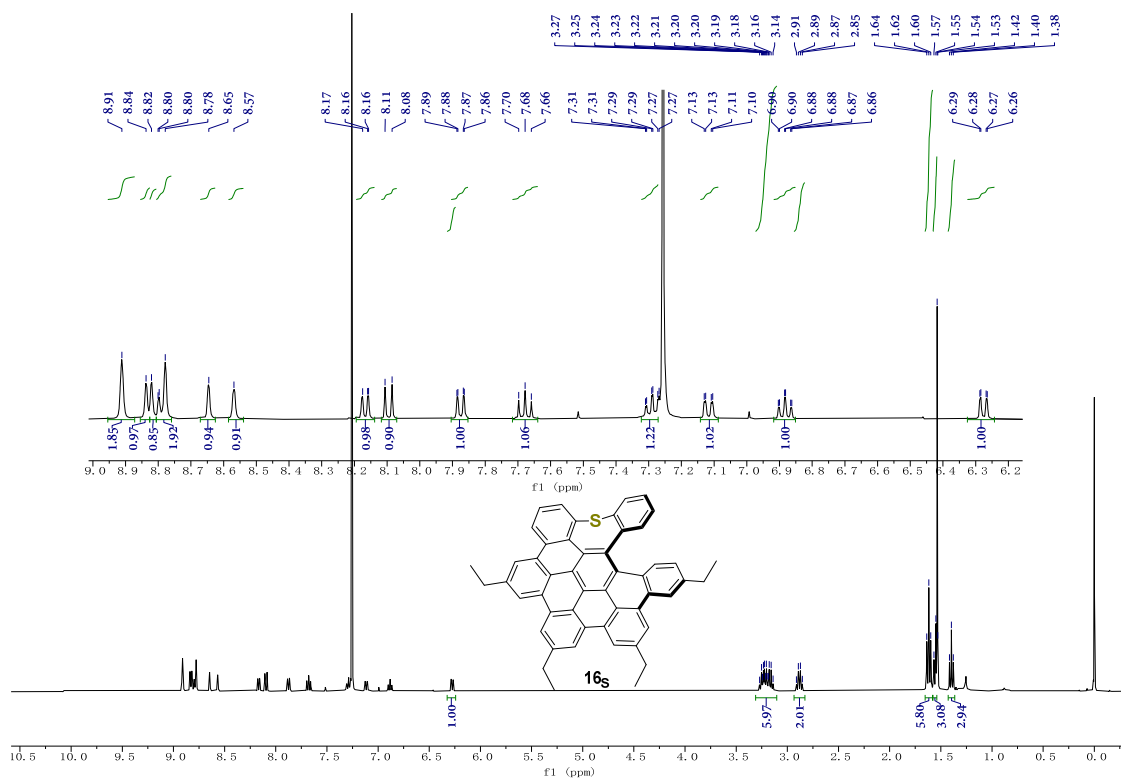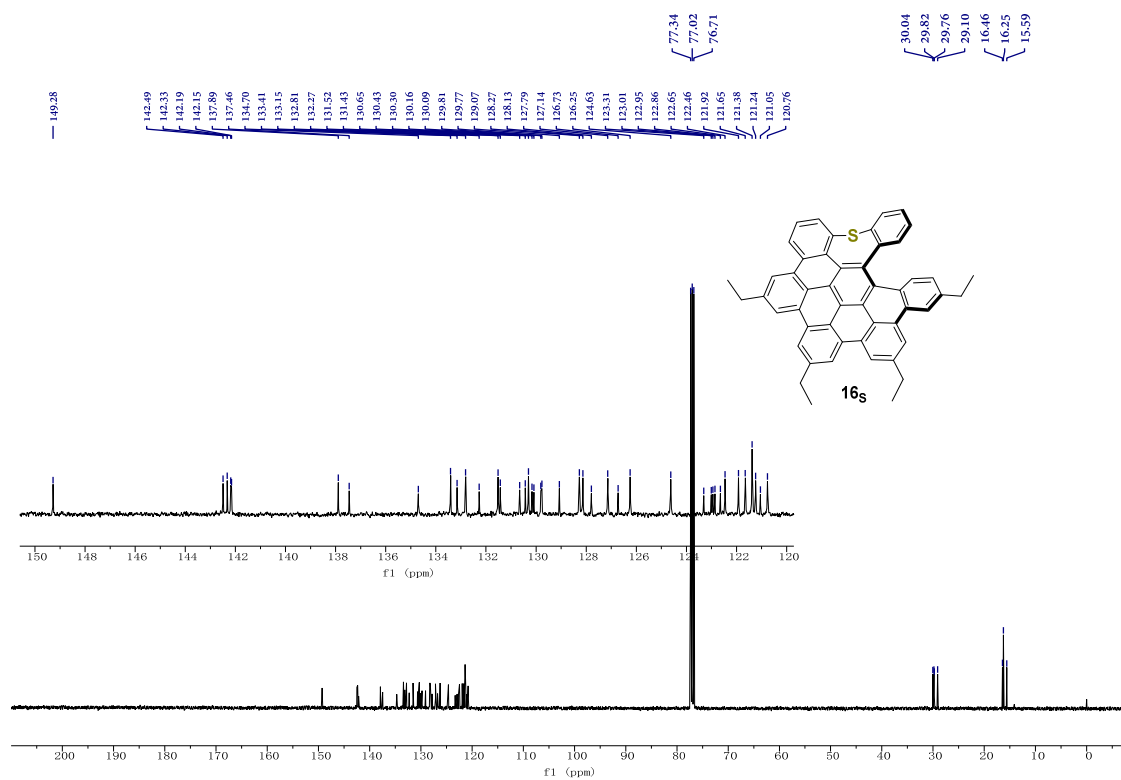

**Figure S38.** <sup>1</sup>H NMR (up) and <sup>13</sup>C NMR (down) of 16<sub>s</sub> in CDCl<sub>3</sub>.

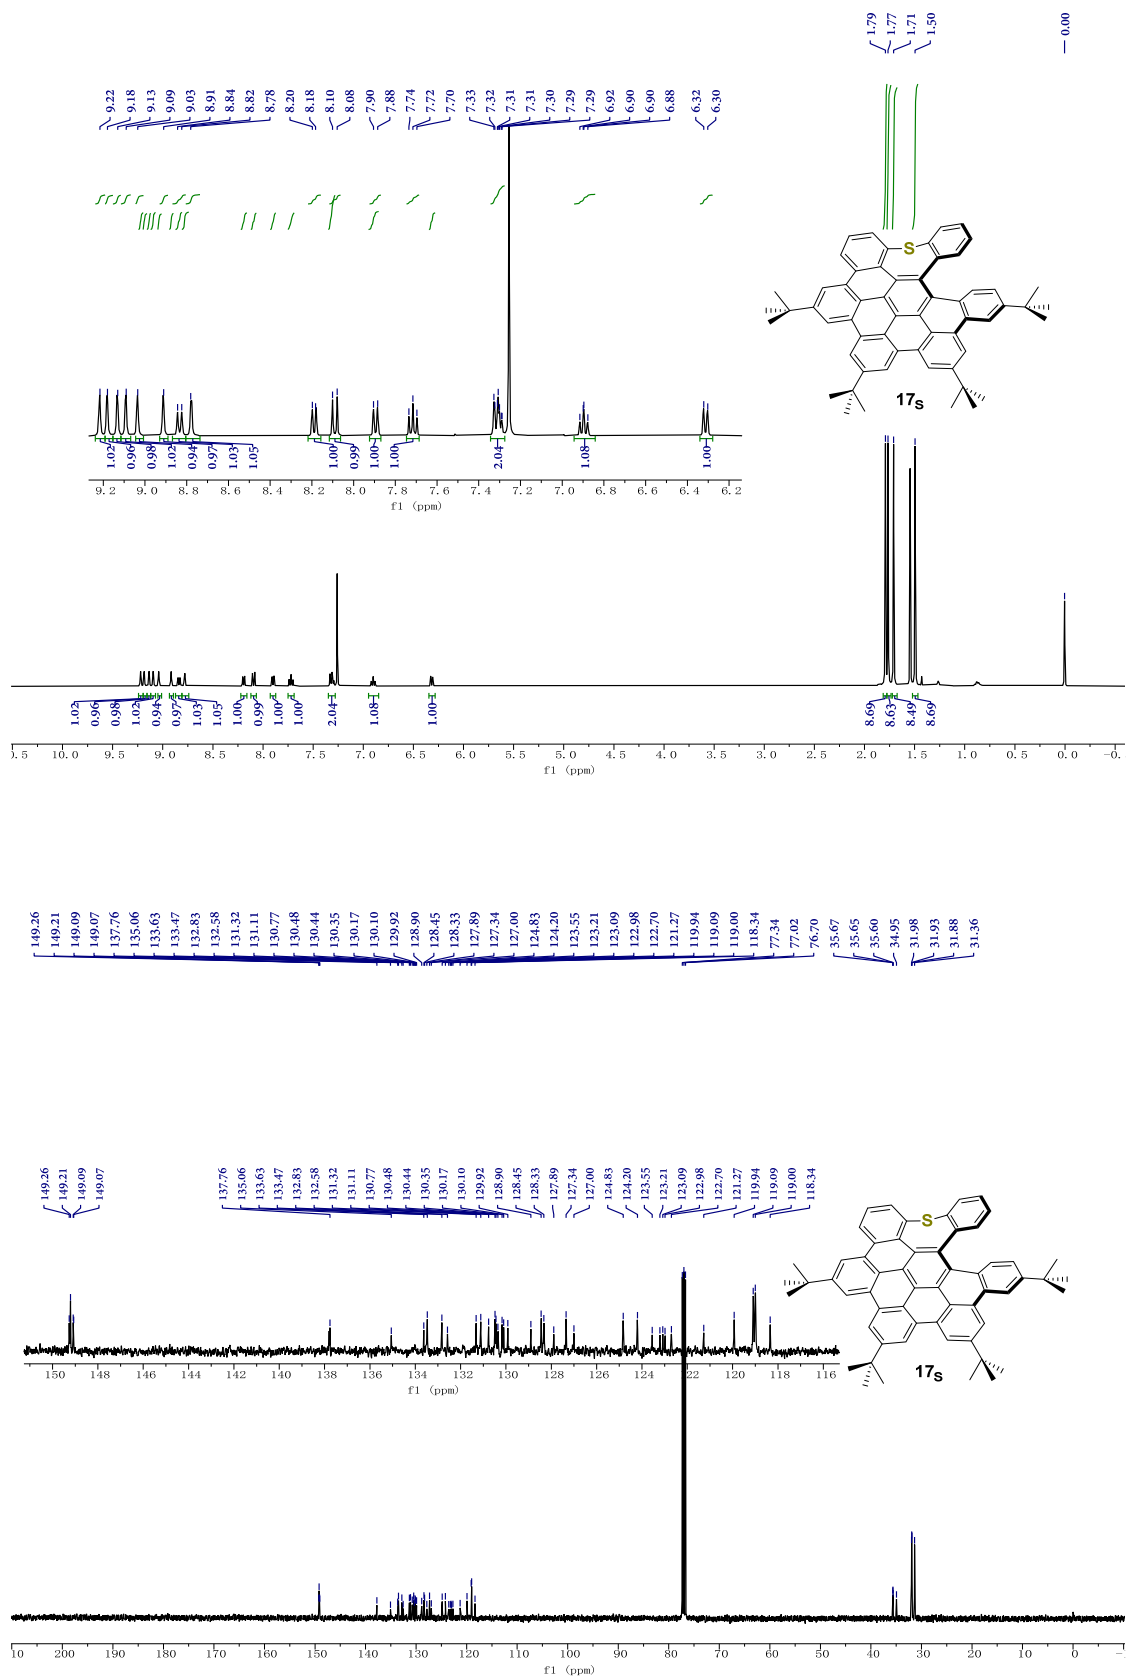

**Figure S39.** <sup>1</sup>H NMR (up) and <sup>13</sup>C NMR (down) of 17s in CDCl<sub>3</sub>.



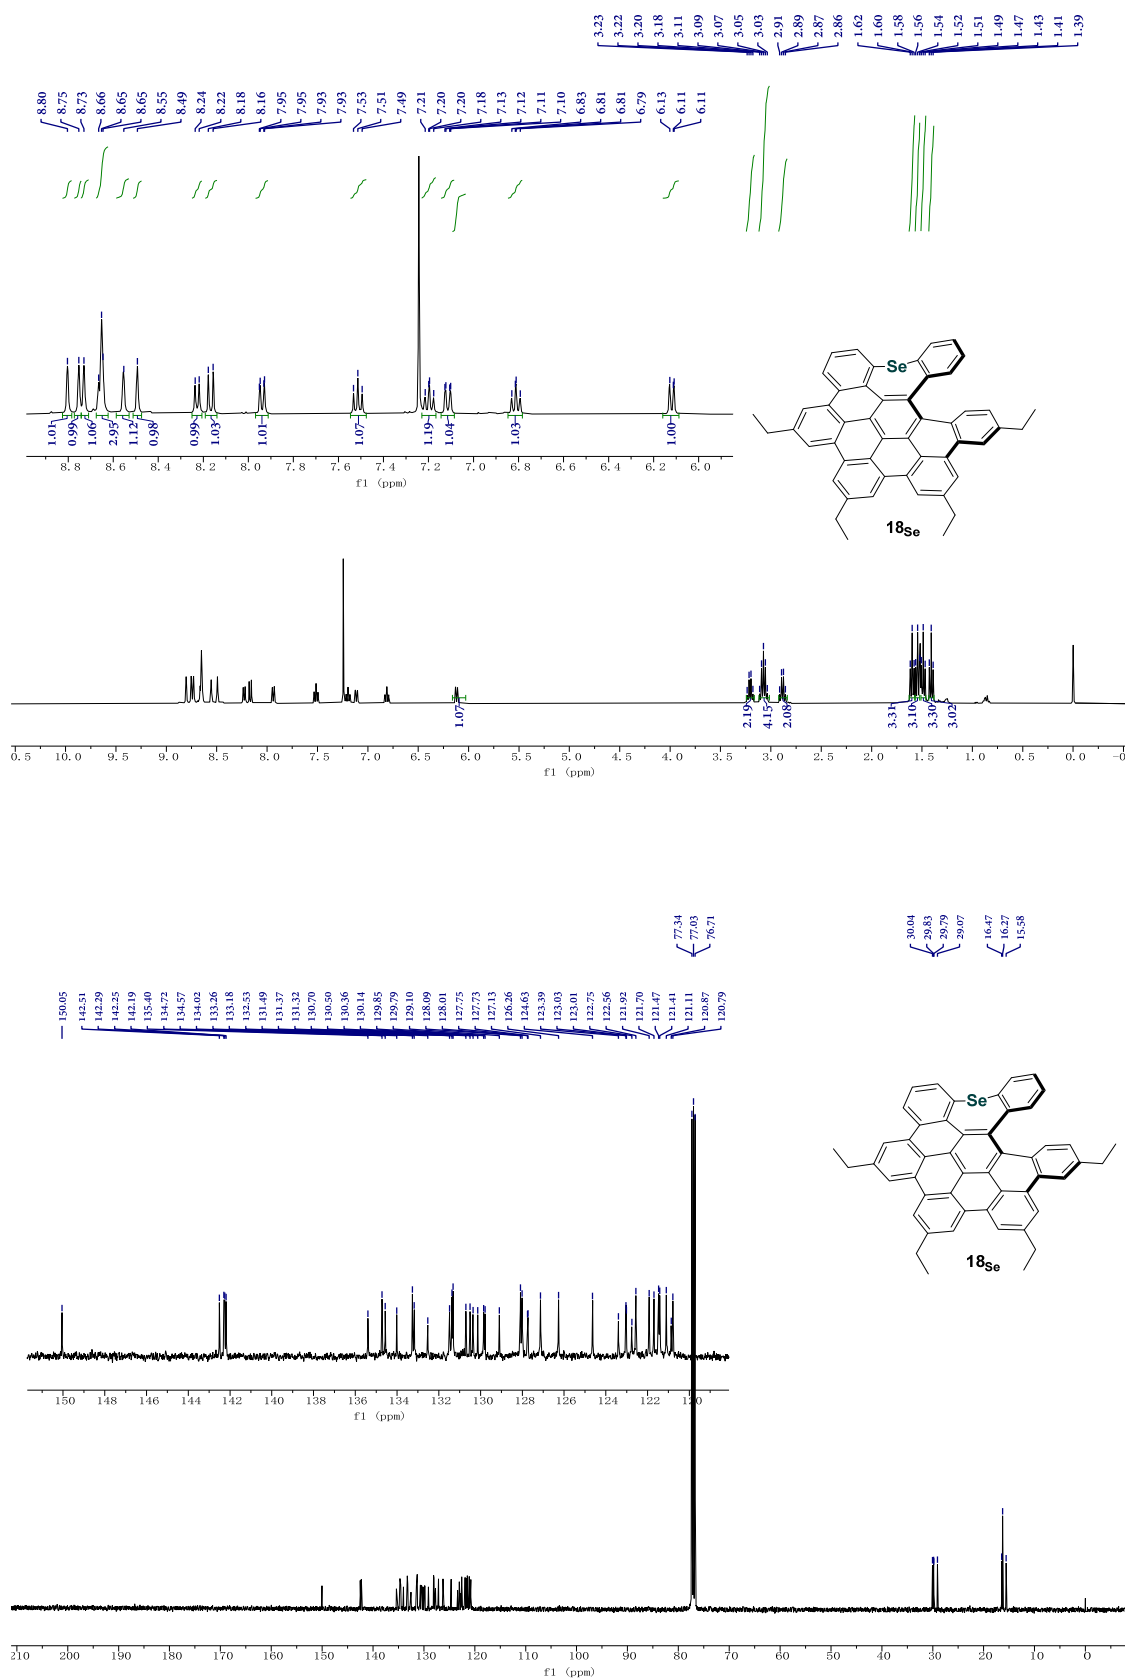

Figure S40. <sup>1</sup>H NMR (up) and <sup>13</sup>C NMR (down) of **18<sub>Se</sub>** in CDCl<sub>3</sub>.

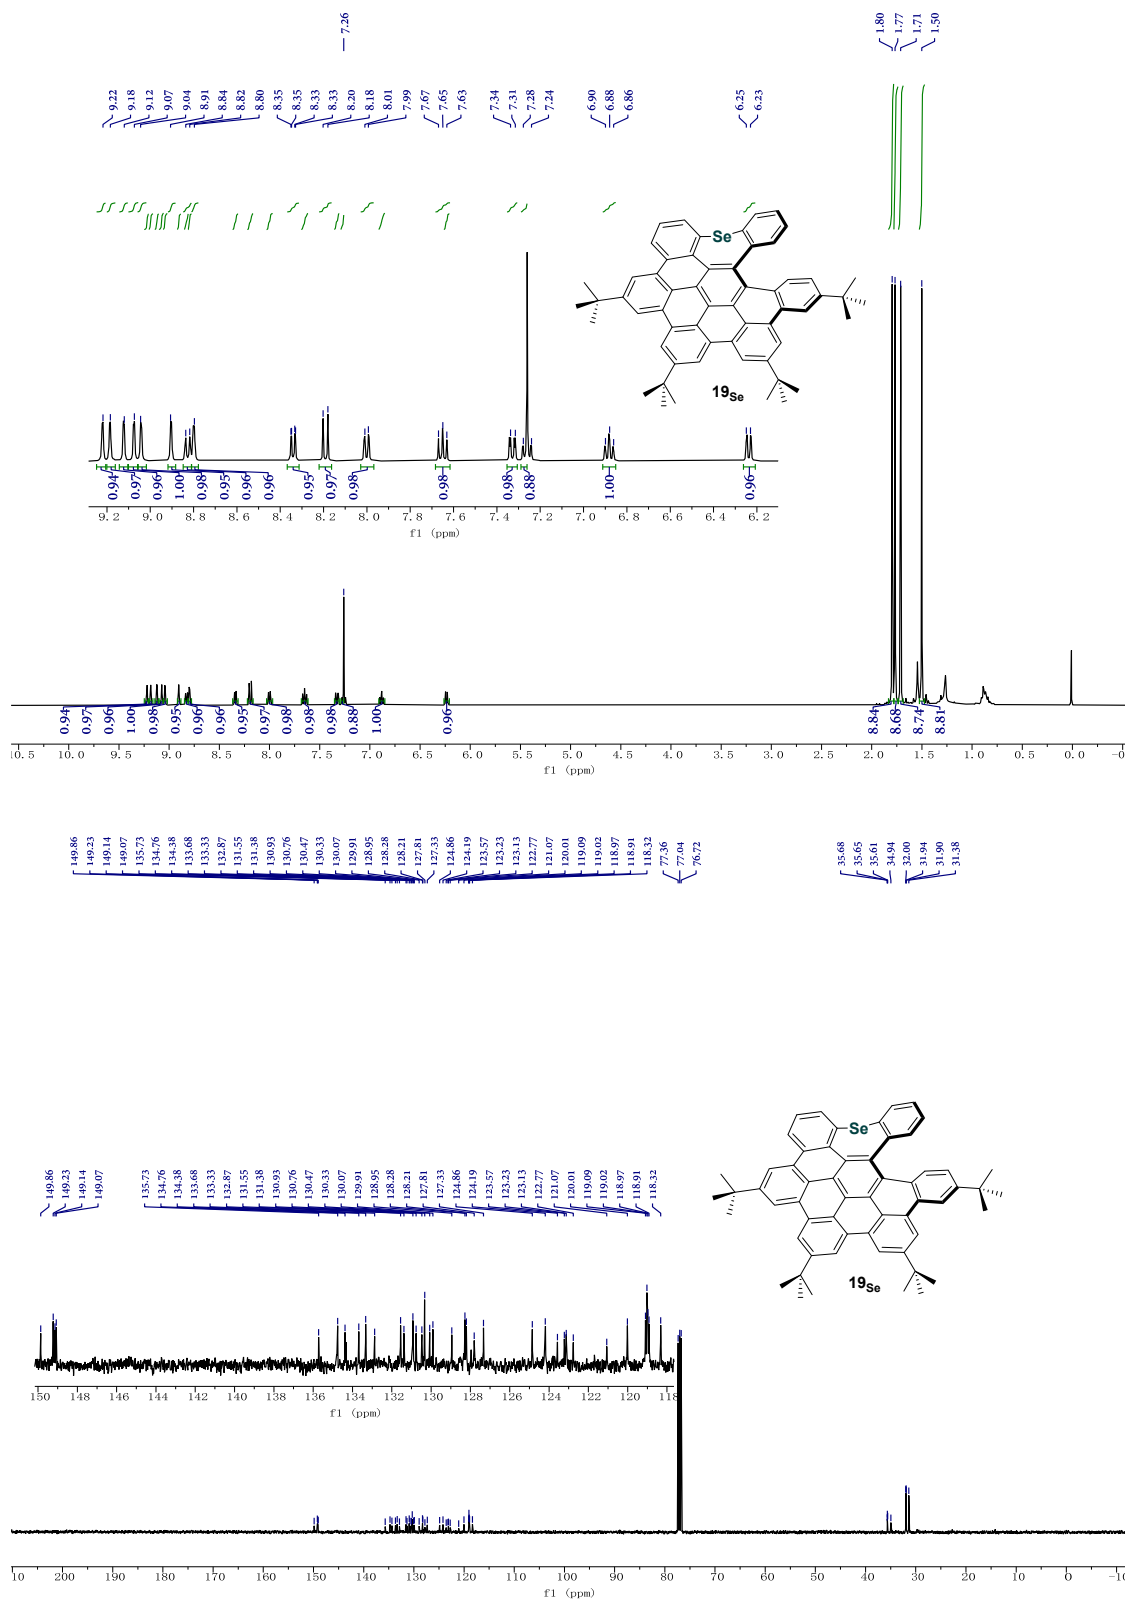

**Figure S41.** <sup>1</sup>H NMR (up) and <sup>13</sup>C NMR (down) of **19<sub>Se</sub>** in CDCl<sub>3</sub>.

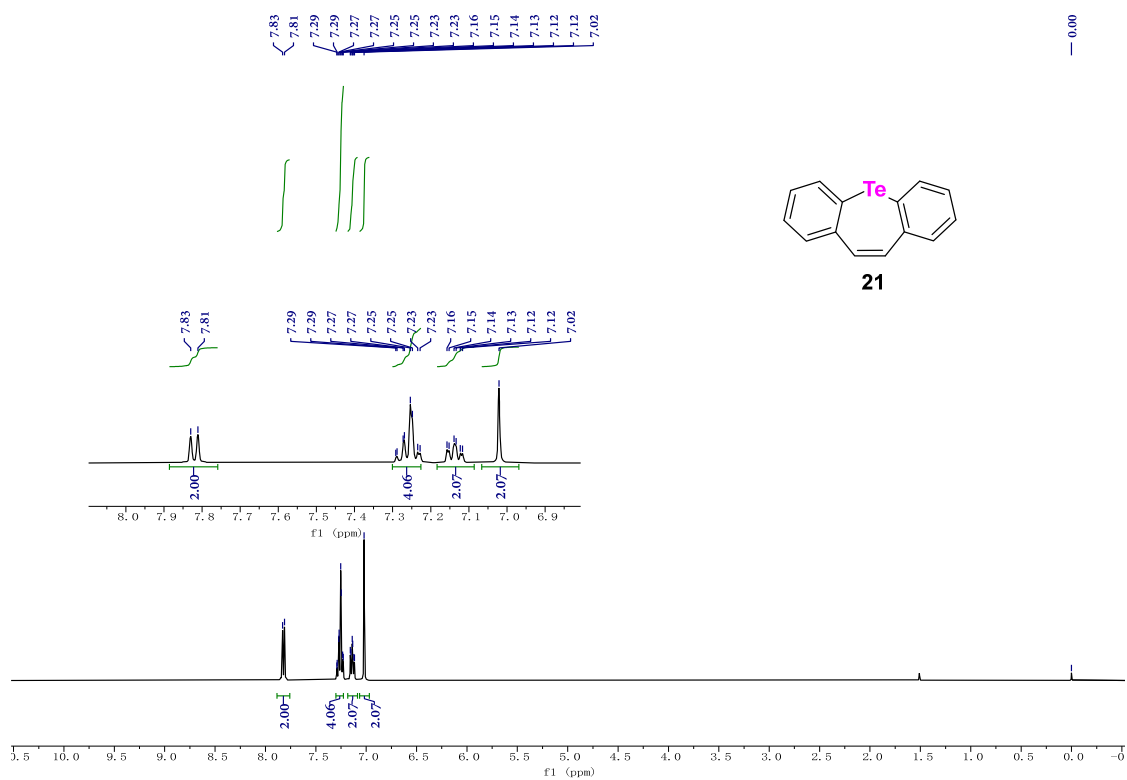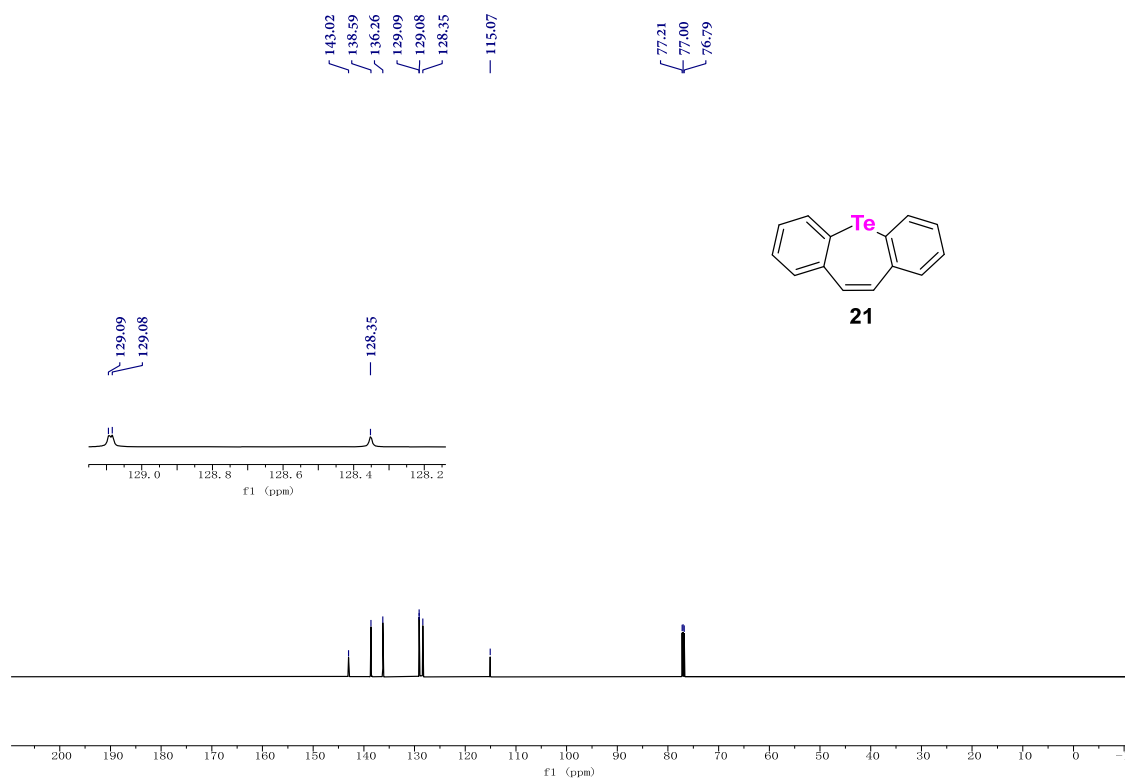

**Figure S42.** <sup>1</sup>H NMR (up) and <sup>13</sup>C NMR (down) of **21** in CDCl<sub>3</sub>.

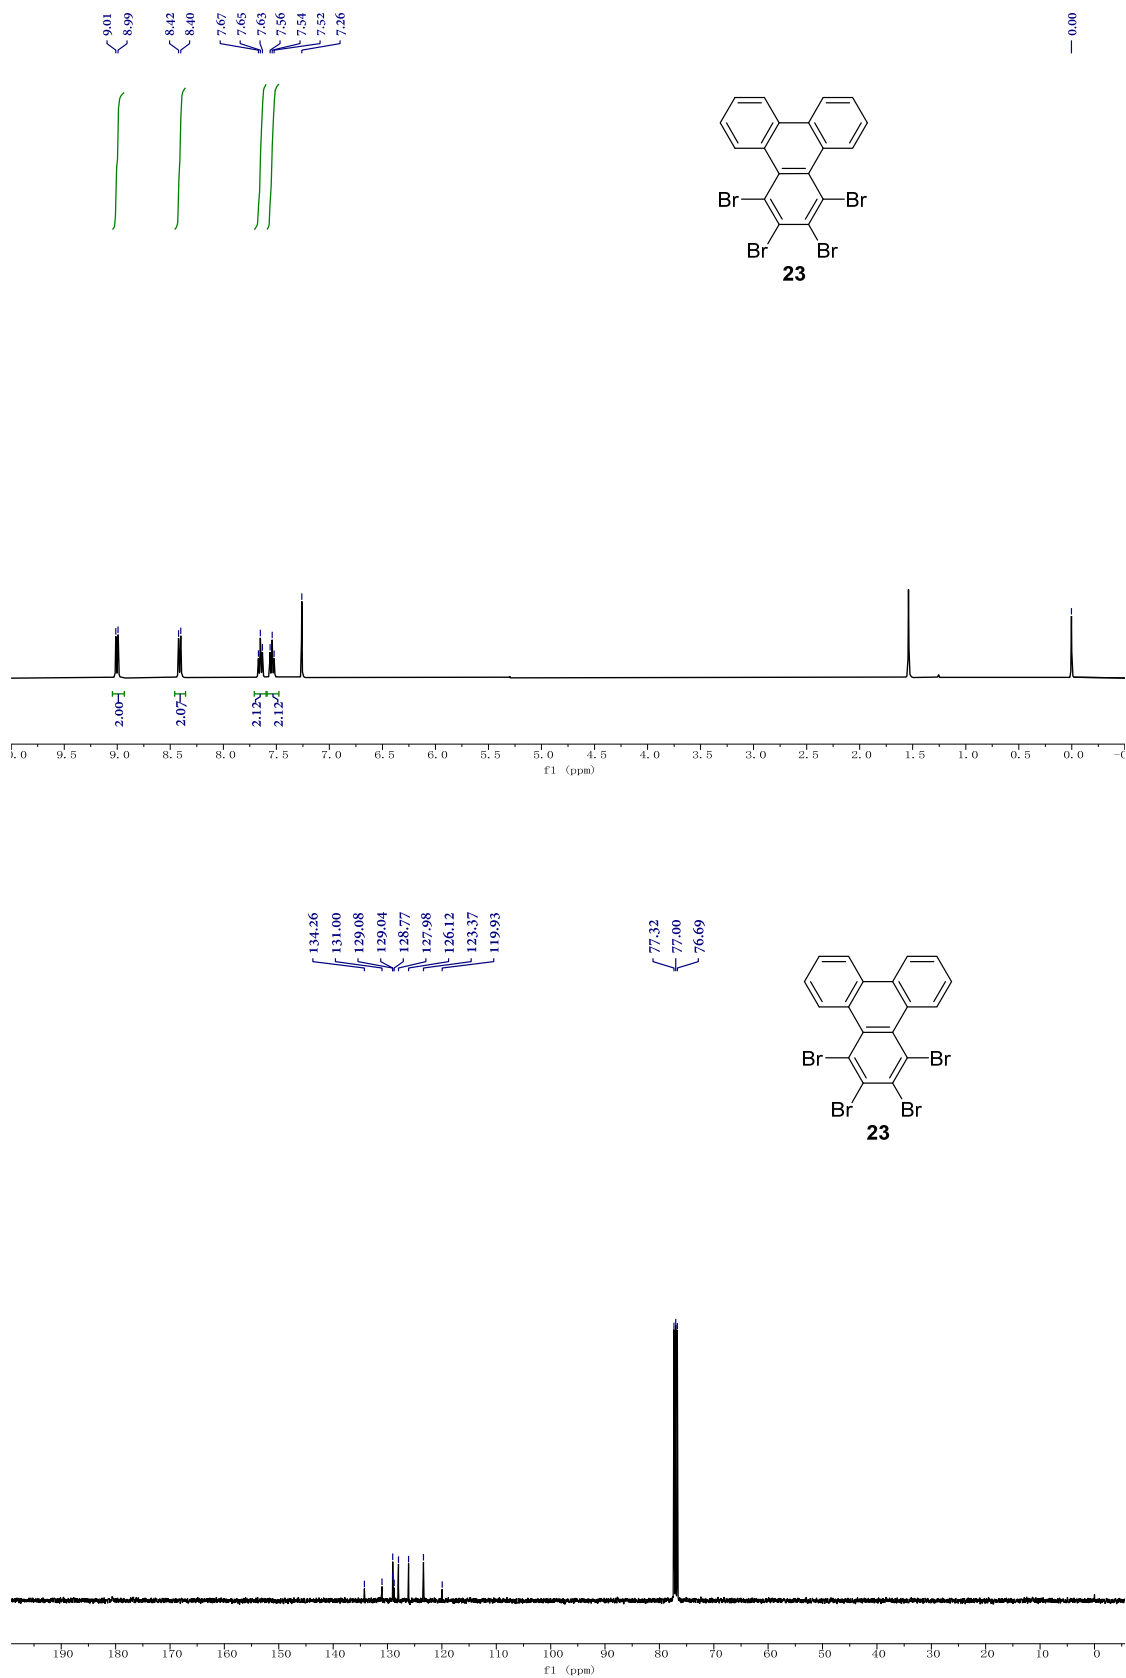

**Figure S43.**  $^1\text{H}$  NMR (up) and  $^{13}\text{C}$  NMR (down) of **23** in  $\text{CDCl}_3$ .

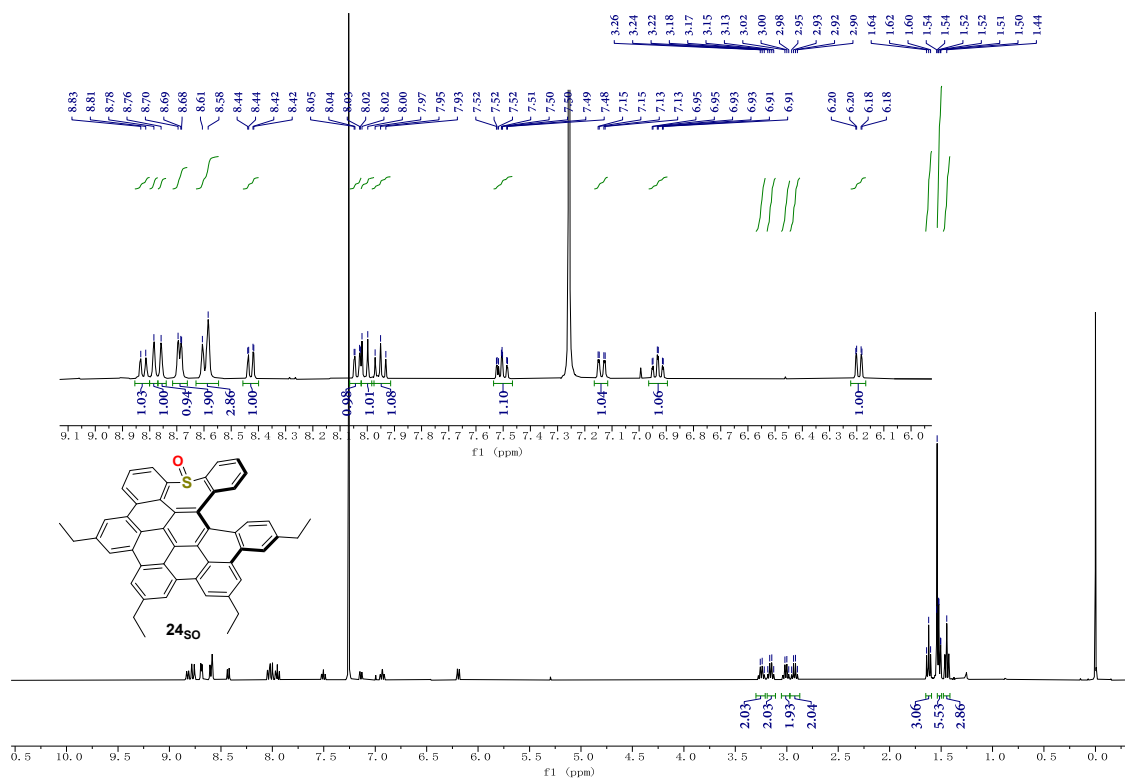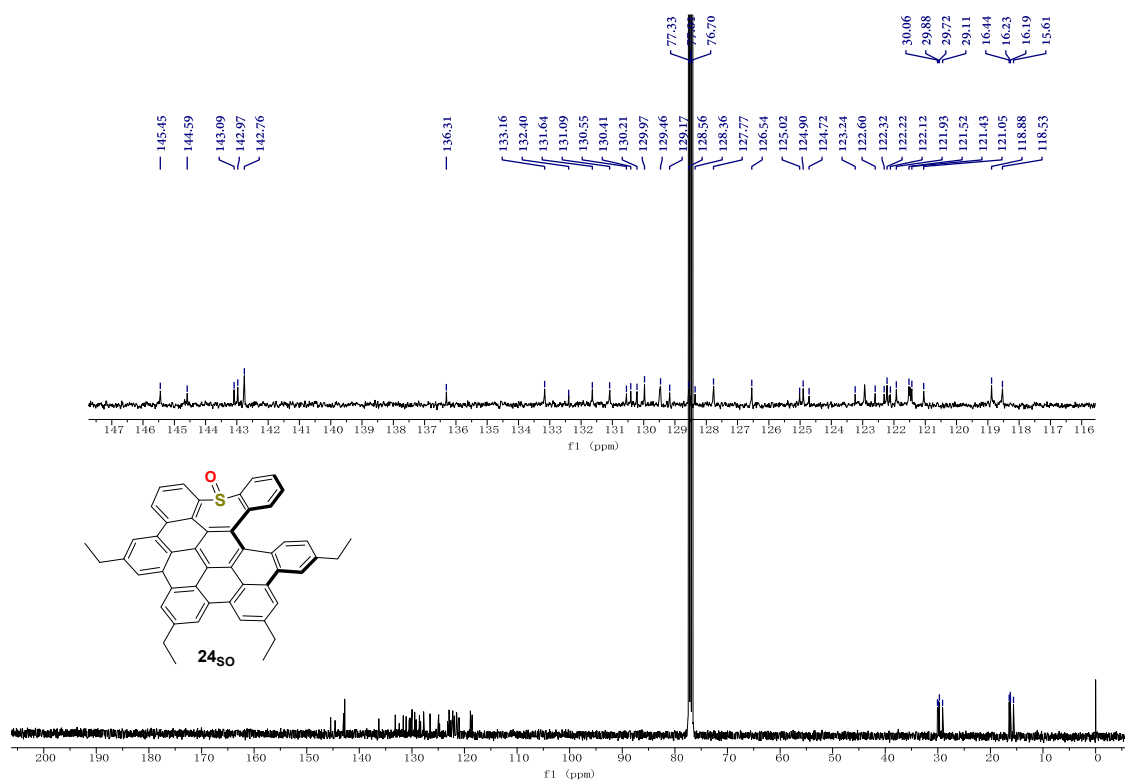

Figure S44. <sup>1</sup>H NMR (up) and <sup>13</sup>C NMR (down) of 24<sub>so</sub> in CDCl<sub>3</sub>.

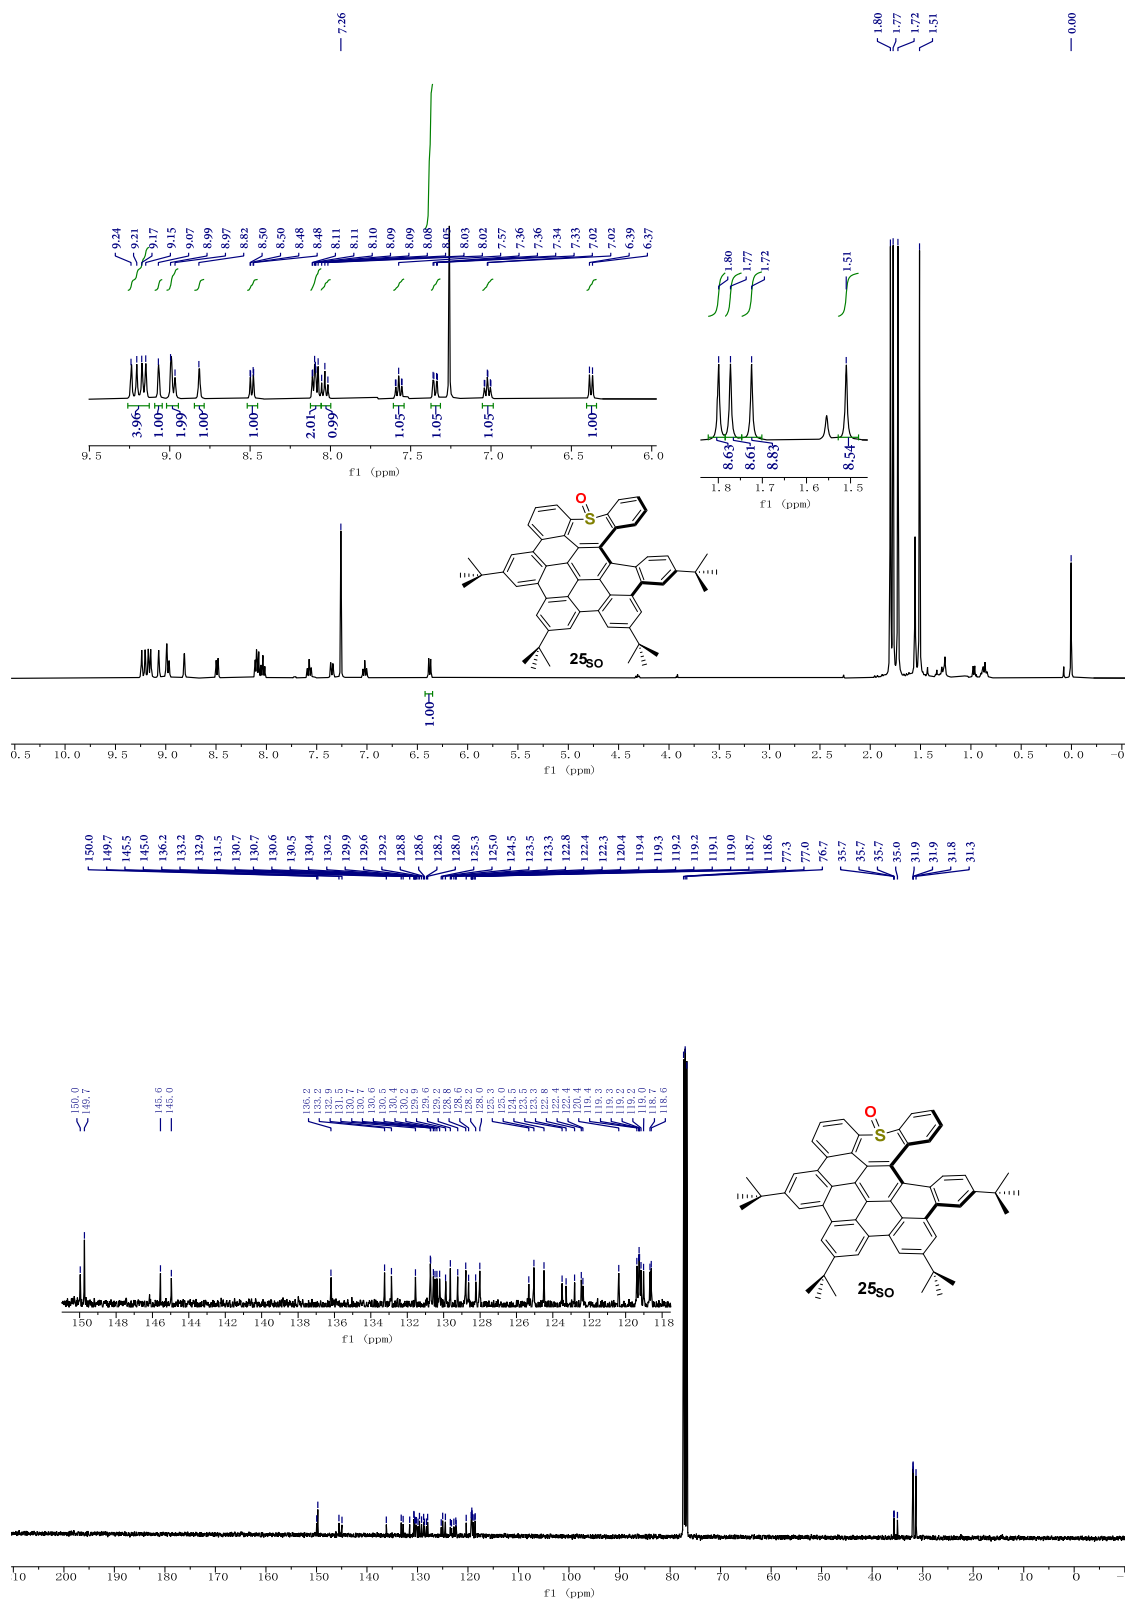

Figure S45. <sup>1</sup>H NMR (up) and <sup>13</sup>C NMR (down) of **25<sub>sO</sub>** in CDCl<sub>3</sub>.

12020216121.1.fid  
a11374b

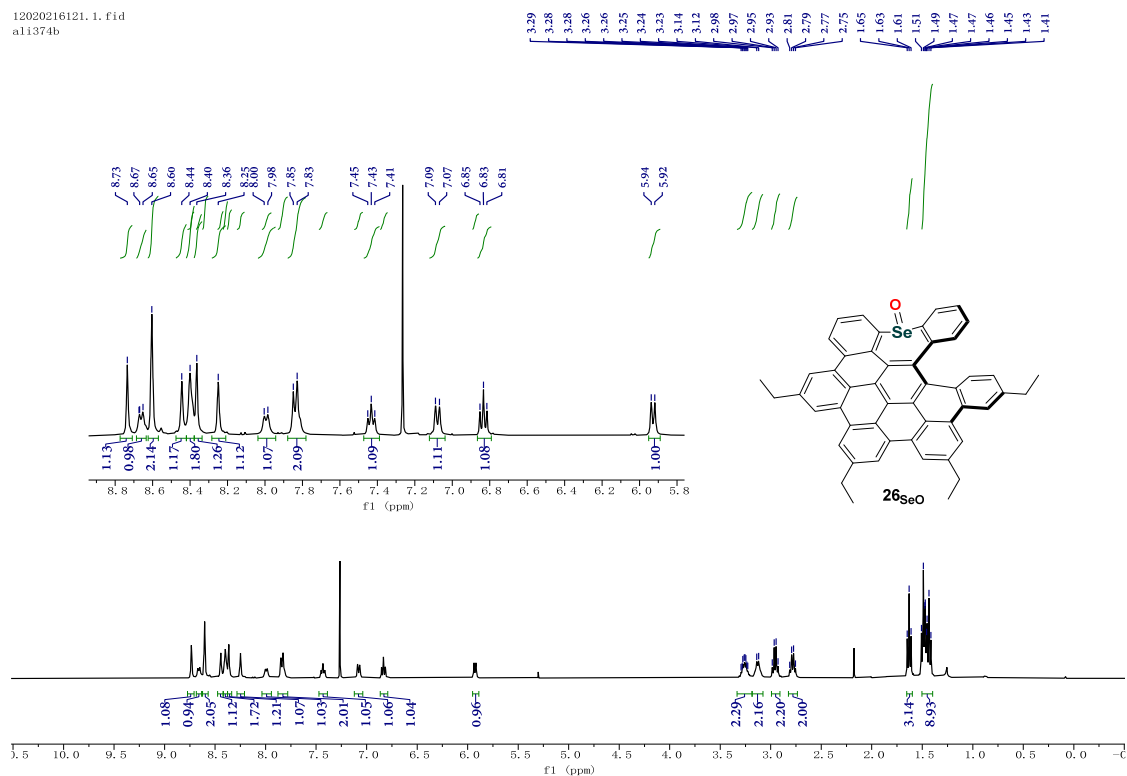

12020216121.2.fid  
a11374b

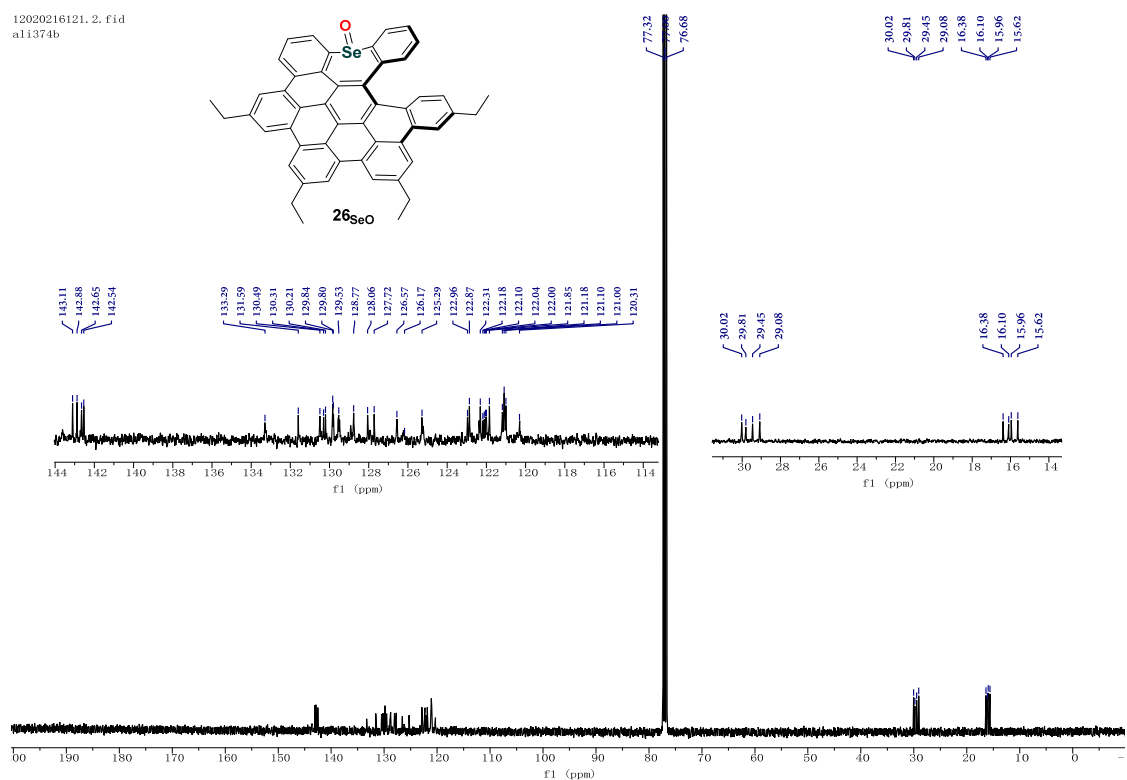

Figure S46. <sup>1</sup>H NMR (up) and <sup>13</sup>C NMR (down) of **26<sub>SeO</sub>** in CDCl<sub>3</sub>.

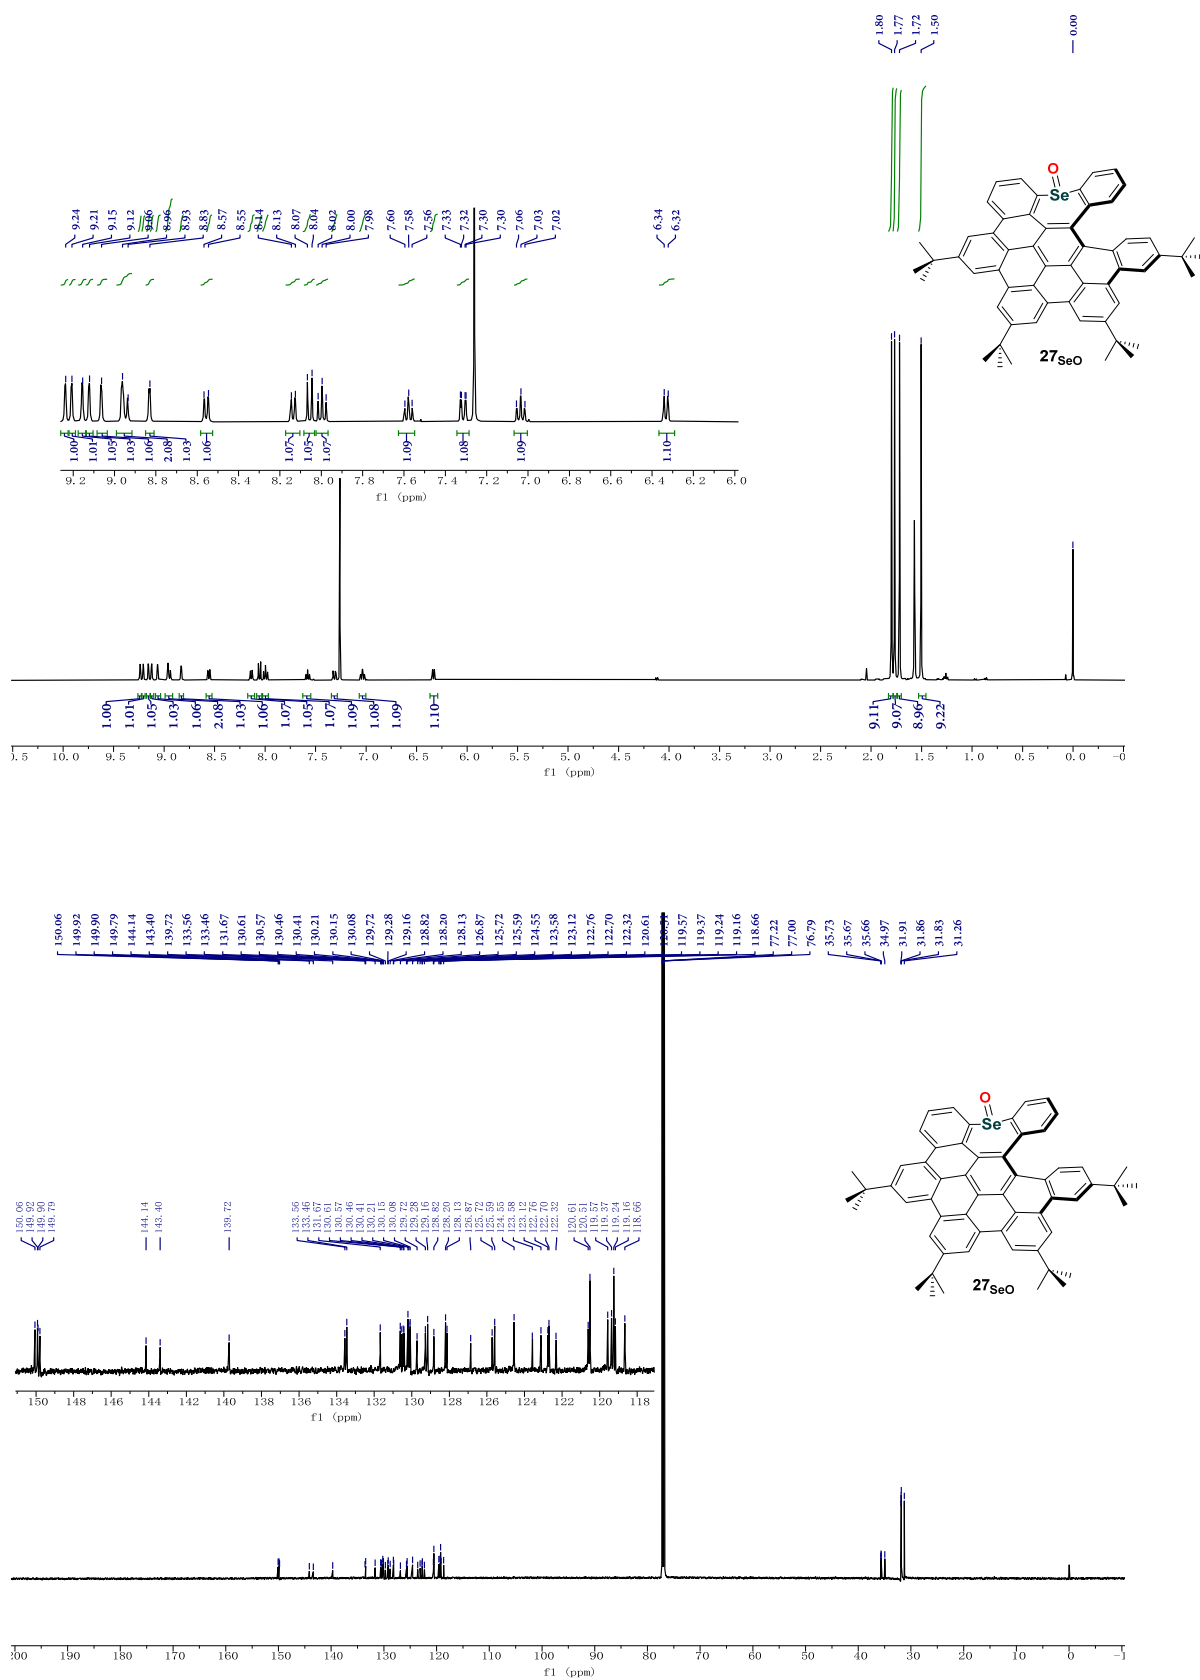

**Figure S47.** <sup>1</sup>H NMR (up) and <sup>13</sup>C NMR (down) of 27<sub>SeO</sub> in CDCl<sub>3</sub>.







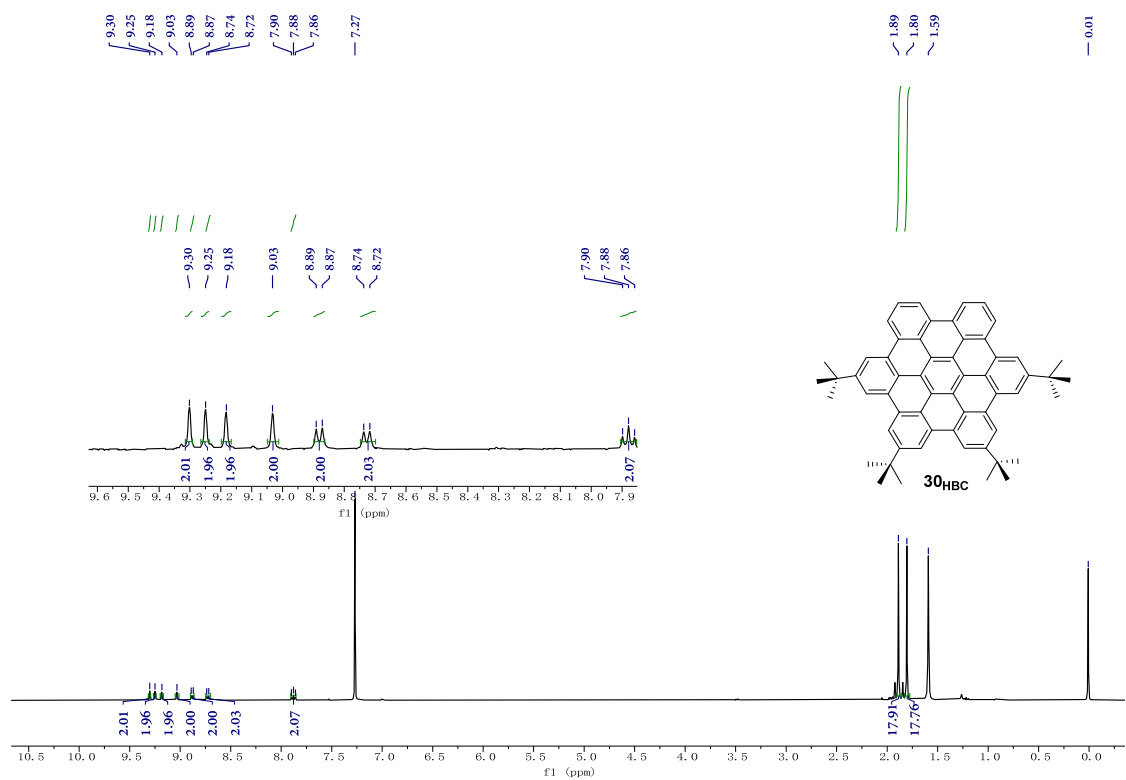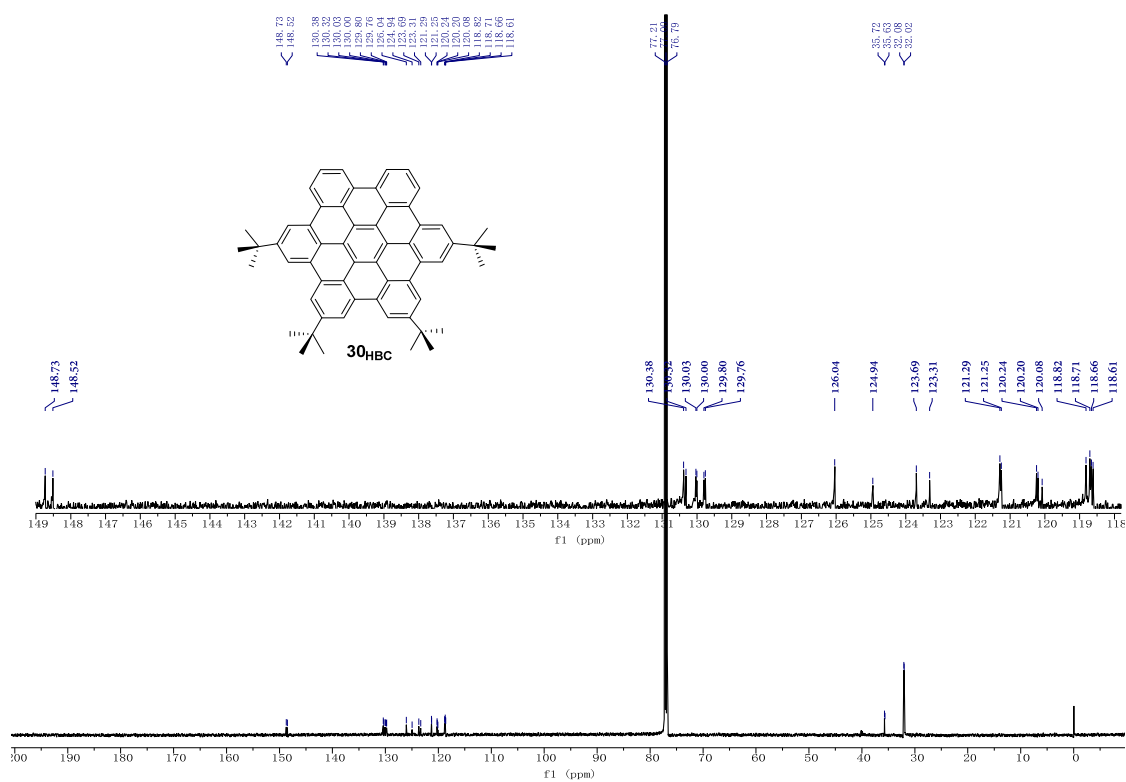

Figure S50. <sup>1</sup>H NMR (up) and <sup>13</sup>C NMR (down) of 30HBC in CDCl<sub>3</sub>.
